# Supplementary material for: An observational descriptive survey of rosacea in the Chinese population: clinical features based on the affected locations
Source: PeerJ. 2017 Jul 7;5:e3527. doi: 10.7717/peerj.3527 (PMC5502086; doi:10.7717/peerj.3527)
Supplement: Data S1 — Demographic and clinical data collected of the rosacea patients and the health control. [file peerj-05-3527-s001.xlsx]

## Sheet: full-face group
			Demographic features															Physiological indicators of epidermal barrier function															Values of self-reported symptoms										Doctor-evaluated grading severity
Number	Sex	Age	Invovled site	Duration	Stage	Oil content(μg·m-2)					Water content				Melanin				Haemoglobin				TEWL				PH			Burning	Dry	Itching	Stinging	Skin tension	Swelling	Ant line sense	Pain	Overall symptoms	Flushing	Non-transient erythema	Papulopustules	Telangiectasia	Burning/stinging	Plaques	Dry	Edema	Outside the facial symptoms	Phymatous	Total
				(months)		Forehead	Cheek	Nose	Chin	Forehead	Cheek	Nose	Chin	Forehead	Cheek	Nose	Chin	Forehead	Cheek	Nose	Chin	Forehead	Cheek	Nose	Chin	Forehead	Cheek	Nose	Chin
1	female	24	2 3 5	24	2	0	0	114	0	74.2	54.18	47.4	45.17	150.25	95	314.33	175.667	363.25	500	441.67	529	11.2	11.5	28.8	13.9	5.59	5.96	5.14	5.59	9	0	5	0	0	0	1	0	15	3	1	2	0	2	0	1	0	0	0	9
2	female	24	1 2 3 5	36	2	289	188	24	237	43.6	39.9	49.87	54.23	175	121	197	157	478	526	459.67	626	23.6	21.8	19.8	17	5.55	5.32	4.71	5.41	6	0	2	2	0	0	0	0	10	2	2	2	0	2	0	1	0	1	0	10
3	female	29	2 3 5	48	1	18	30	57	18	47.8	56.7	52.7	64.97	160.33	161.667	212.33	212	260.66	351	486.67	488	7.5	9.5	21.7	16.9	5.2	5.75	5.17	5.75	5	9	3	7	7	3	2	0	36	2	0	0	0	2	0	3	0	0	0	7
4	female	17	2 3 5	6	1	13	1	56	15	49.07	28.07	79.57	57.67	112	69	226.67	121	260	382	474.67	425	9.1	18.4	4.3	23.2	4.22	4.76	4.88	4.94	6	6	4	1	5	0	0	0	22	2	2	0	0	2	0	1	0	0	0	7
5	female	23	2 3 5	48	2	94	68	182	82	61.43	34.83	62	54.83	213.66	170.33	96.67	238	443	517	526.33	520	9.4	6.8	19	8	4.88	5.12	4.7	5.35	3	9	4	9	8	0	3	0	36	1	2	2	1	1	0	3	0	0	0	10
6	female	33	1 2 3 4 5	84	2	40	23	51	42	64	43.53	59.33	64.1	182	161	208	185.667	373.667	458	424.33	416	5.4	10.4	9.2	9.3	5.22	5.45	5.58	5.41	5	2	7	3	0	0	0	0	17	2	2	1	3	2	0	1	0	0	0	11
7	male	41	1 2 3 4 5	36	2	70	36	28	69	28.87	32.07	52.3	30.6	191	174	146.667	206	433.33	438.33	432	609.667	15.1	15	11.7	17.7	5.15	5.23	5.55	5.13	5	5	1	0	0	0	0	0	11	2	2	2	2	2	1	1	0	0	0	12
8	female	46	1 2 3 4 5	2	1	110	93	126	77	17.63	34.73	61.23	60.07	112.33	84	167	181	334.67	445.67	355	474.67	21	20.2	13.1	26.2	5.24	5.74	5.94	5.3	6	6	2	0	7	0	0	0	21	2	2	0	3	2	1	2	0	0	0	12
9	female	44	1 2 3 4 5	24	1	12	8	12	18	16.47	52.47	48.97	44	164.75	61	208	218	364	649.667	561.67	522.33	23.6	25.2	19.9	23.2	5.16	5.33	5.16	5.25	8	5	3	0	0	0	0	0	16	3	2	2	3	2	1	2	1	0	0	16
10	female	26	1 2 3 4 5	24	1	76	37	76	84	51.33	25.87	37	51.43	209.33	210	118	242	444.667	411.33	354.33	567.25	9.6	10.7	6.2	9.2	5.27	5.69	5.27	5.83	8	5	8	3	0	0	0	0	24	3	1	0	2	2	0	1	0	0	0	9
11	female	21	2 3 5	8	2	105	94	105	123	48.8	20.87	50.57	37.97	229.67	198.33	102.33	246	389	482.67	522.67	502.33	7.2	17.1	33.7	11.7	5.17	5.37	5.17	5.13	5	6	0	0	3	0	0	0	14	2	2	2	2	0	0	3	0	0	0	11
12	female	28	1 2 3 4 5	96	2 3	49	38	49	50	45.43	79.97	38.83	39.2	190.33	150.33	185	199.67	429	589.67	472	439.33	8.6	17.2	3.8	13.1	5.08	5.41	5.08	5.63	8	9	9	5	4	3	2	2	42	2	2	3	2	2	0	2	1	0	0	14
13	female	21	1 2 3 5	7	2	11	5	182	16	75.97	44.37	61.23	78.37	102.67	66.33	262.67	156	424.67	518.67	486.33	496	7.4	9.2	6	4.6	5	5.38	5	5.38	5	4	0	0	5	3	0	6	23	2	1	2	0	1	0	1	0	1	0	8
14	female	24	1 2 3 4 5	120	1 4	7	38	51	8	61.87	62.26	48.97	41.03	96.67	51	135.33	121	397	493.67	440	580	6.2	6.6	2.2	5.3	5.09	5.38	5.09	5.27	7	7	3	0	0	6	5	0	28	2	2	2	2	2	1	1	0	0	1	13
15	female	57	1 2 3 4	216	1	6	3	28	22	21.3	26.57	37	34.07	208	111	155.67	261.67	516.33	701.33	500	523	19.9	8.1	15.1	11.5	5.22	5.14	5.41	5.4	6	7	3	0	3	3	3	0	25	2	3	2	2	2	2	2	1	0	0	16
16	female	26	1 2 3 4	96	1 3	114	76	126	67	50.03	28.2	50.57	62.53	146.667	107.667	244.33	178	426	426.33	549.33	420	6.2	11.8	16.8	10.8	5.55	5.57	5.92	5.55	6	3	8	3	3	0	3	0	26	2	1	0	1	2	0	1	0	0	0	7
17	female	43	1 2 3 5	2	1	24	18	79	23	47.43	43.73	38.83	59.33	167	150	210.5	186.33	402	454	437	538.67	33.7	28.5	16.2	34.4	5.09	5.15	5.24	4.7	9	9	8	3	5	3	5	3	45	4	4	0	2	2	1	2	1	0	0	16
18	female	38	1 2 3 4 5	60	2	57	66	77	45	71.9	56.6	30.13	64.23	208	134.33	197	198.33	331	410	394.67	492.67	3.8	6.3	10.3	4.6	5.36	5.55	4.89	5.58	0	3	0	0	3	0	0	0	6	1	1	2	3	1	0	1	0	0	0	9
19	female	47	1 2 3 5	15	2	56	37	18	81	54.57	42	74.1	64.77	118	79	212.33	185	394	472	410.33	566	6	10.2	16.9	9.9	5.32	5.7	4.49	5.55	3	3	0	0	4	0	0	0	10	3	2	2	2	2	0	2	0	1	0	14
20	female	19	1 2 3 5	36	2	182	47	84	147	59.23	34.47	42.67	67.9	152.33	126.67	226.67	163.33	405.67	474	655.75	541.67	5	11.4	23.2	13.8	5.95	5.79	4.88	5.94	5	0	0	0	0	0	0	0	5	3	2	2	1	2	0	0	0	0	0	10
21	female	20	1 2 3 5	60	2 3	51	52	123	61	40.67	20.2	64.6	58.03	166.67	140.33	284.33	201.33	383	467.67	373.67	485.67	128.8	22.8	8	14.1	5.36	5.65	4.86	5.16	8	8	5	2	7	1	2	2	35	2	1	3	0	3	0	2	0	0	0	11
22	female	43	2 3 4 5	12	1	28	18	50	50	22	14.3	28.87	23.63	191.33	180	284.67	226.33	368	466.3	575.67	520.67	19.8	35.6	34.4	20.8	5.8	6.05	5.16	5.59	4	4	7	1	7	7	0	0	30	2	2	0	1	1	1	2	1	0	0	10
23	female	41	1 2 3 4 5	276	1	126	135	16	220	43.67	31.97	17.63	36.47	184	142.67	245.33	231.33	467	585	518	583.33	21.7	25.2	17.2	22.7	4.96	5.52	5.55	5.54	8	8	2	2	6	5	2	0	33	1	2	1	3	3	1	3	1	0	0	15
24	female	23	2 3 4 5	72	1 3	79	15	8	83	45.33	42.9	16.47	44.2	156.33	114.33	147.33	192.33	446.67	453.67	511.33	445.67	4.3	9.5	9.2	15.4	4.95	5.32	5.09	5.15	7	5	2	2	0	0	0	0	16	2	1	1	1	3	0	2	0	0	0	10
25	male	46	1 2 3 5	24	2 3	79	23	223	86	26.37	7.34	51.33	45.4	232.5	227.66	211	319	425	507.33	496	473	19	13.6	6.6	18.3	4.74	4.98	5.36	4.82	7	5	10	5	3	3	3	3	39	2	1	3	1	2	2	2	0	0	0	13
26	female	45	1 2 3 5	12	1	188	173	56	105	66.2	27.57	39.9	47.77	150.6	108.67	191.33	190	565.67	570.67	567.67	519.67	14.8	14.5	8.1	13.1	4.88	5.22	5.32	5.44	9	9	1	4	9	5	4	1	42	1	3	1	3	3	2	2	1	0	0	16
27	female	22	1 2 3 4	20	2 3	65	3	182	59	64.43	68.73	56.7	61.13	164	124.67	221.67	194.33	397.33	496.67	389.67	454.67	4	2.2	11.8	3	4.46	4.63	5.95	4.73	5	0	0	0	0	0	0	0	5	2	1	2	2	2	0	0	0	0	0	9
28	female	24	1 2 3 4 5	18	2 3	82	38	51	152	64.37	64.27	28.07	63.03	199.33	187.33	192.67	241.67	441.67	438.67	364.67	569.33	12.5	15.1	19	7.6	5.5	5.33	5.36	5.7	10	10	8	7	6	2	0	0	43	3	1	3	1	3	1	2	0	0	0	14
29	female	25	1 2 3 4 5	10	2 3	46	51	28	64	46.7	43.37	34.83	52.87	206	135.33	191.33	181	526.33	566.67	427.33	546.67	10.7	16.8	5.3	15.6	5.19	5.6	5.8	5.74	6	6	2	2	5	0	2	0	23	3	2	3	2	2	0	1	0	0	0	13
30	female	48	1 2 3 5	60	1	0	0	126	17	35.75	38.1	3.5	39.8	151.67	115.33	221.67	158	424.33	441.67	553.67	529	14.2	16.2	11.5	19.2	5.21	5.62	4.82	5.39	4	4	0	0	2	0	0	0	10	1	1	1	3	1	0	2	0	0	0	9
31	female	38	2 3 4 5	300	1	72	48	79	61	62.73	52.5	74.2	74.77	102.33	67	192.67	174.33	432	459.67	373.667	487.33	7.3	10.3	10.8	12.3	5.75	5.92	5.54	5.92	9	7	7	3	6	6	3	3	44	2	2	2	3	3	1	1	1	0	0	15
32	female	49	1 2 3 4 5	6	1 3	29	23	79	32	61.53	65.93	43.6	67.67	185	241	121	212	355	486.67	433.33	522.67	7.6	9.1	14.4	10.1	5.18	4.8	5.45	4.66	5	0	10	0	3	0	0	0	18	3	2	0	2	2	0	0	0	0	0	9
33	male	19	1 2 3 4	72	2 3	133	157	188	84	64.93	50.58	47.8	62	262.67	217.67	161.667	314.33	561.67	556.33	334.67	472	9.7	8.2	11.5	9.6	4.67	5.4	5.99	4.96	8	6	0	2	2	0	2	0	20	2	2	3	0	2	0	1	0	0	0	10
34	female	31	2 3 4	6	2	72	3	65	71	55.5	52.67	49.07	59.33	135.33	96	69	197	354.33	396	364	486.33	6.7	6.6	21.8	9.6	4.87	5.14	5.92	5.13	7	5	3	2	0	0	0	0	17	2	2	2	0	2	0	1	0	0	0	9
35	female	44	2 3 4 5	240	2 3 4	94	77	82	152	62.63	53.16	61.43	52.3	155.67	125.33	170.33	212.33	379	488	444.667	440	4.3	3.3	9.5	5.6	4.72	4.71	4.66	4.59	0	0	0	0	0	0	0	0	0	3	2	3	3	0	0	0	0	0	1	12
36	female	32	1 2 3 4 5	24	2 3	71	36	46	54	57.07	53.77	59.33	61.23	244.33	209.67	259.33	226.67	445.33	473	389	500	11.3	13.4	18.4	11.9	5.41	5.17	5.05	5.48	1	1	5	0	3	0	0	5	15	1	1	3	1	1	0	2	0	0	0	9
37	female	47	2 3 4	360	1 3	53	67	0	84	51.57	59.73	90	48.97	210.5	196.67	190	284.33	438.75	471.33	436.33	549.33	4	5	6.8	4.6	4.57	4.88	4.78	4.98	7	3	7	3	3	5	3	0	31	1	2	2	3	3	2	2	1	0	0	16
38	female	41	1 2 3 4 5	24	2 3	0	3	72	19	46.43	39.53	84.67	37	145	155.67	284.67	174	544.67	440.67	359.33	437	11.5	6.2	11.2	9.5	4.68	4.99	4.82	5.23	3	0	0	0	0	0	0	0	3	1	2	3	3	1	0	2	0	0	0	12
39	female	34	1 2 3 4 5	180	2	53	31	29	36	59.87	53.63	45.33	50.57	205.67	173.67	245.33	214.33	430.33	394.67	404.33	473.33	6.7	4.6	23.6	9	5.41	5.92	5.28	5.46	4	8	0	2	6	0	0	0	20	3	1	2	2	2	0	1	0	0	0	11
40	female	31	2 3 4 5	72	1	149	128	133	70	46.6	52.83	47.33	38.83	206.33	204.33	147.33	209	400.33	410.33	473	518	3.2	7	7.5	9.7	4.78	5.24	5.39	5.08	4	6	6	0	0	0	0	0	16	1	1	1	2	1	0	1	0	0	0	7
41	male	30	2 3 4 5	156	2	92	154	128	92	46.73	24.55	51	30.13	207.33	100	235.67	301.67	481	655.75	467.67	511.33	6.6	15.5	9.1	12.7	4.69	4.89	4.36	4.98	0	0	4	0	0	0	0	0	4	0	2	2	1	0	0	0	0	0	0	5
42	female	24	1 2 3 4 5	24	2	10	5	154	45	59.27	35.53	65.97	74.1	134.67	106.67	197.33	186.67	392.33	373.67	466.3	496	14.7	12.2	22.7	10.7	4.7	4.49	5.59	4.5	0	0	3	0	0	0	0	0	3	0	1	2	0	0	0	0	0	0	0	3
43	male	39	2 3 5	60	1	44	43	0	66	61.83	45.47	52.97	42.67	280.33	338.67	188	413.67	459	575.67	585	567.67	11.6	12.6	15.4	15.3	4.27	4.88	4.82	4.79	0	4	2	0	0	0	0	0	6	1	2	1	3	0	0	1	0	0	0	8
44	female	17	1 3 4 5	24	2	157	70	63	43	51.27	52.27	17.3	47.4	138.67	113.67	246	172.67	394	325.67	453.67	389.67	5.3	5	18.3	5	4.83	4.86	5.54	5.27	4	3	5	3	5	3	3	0	26	3	1	2	2	1	0	0	0	0	0	9
45	female	23	2 3 4 5	36	1	10	3	12	6	23.8	31.67	5.2	49.87	164.67	173.67	188.33	211	301.33	386	498.67	364.67	4.3	7.7	13.1	4.8	5.23	5.16	5.45	5.34	3	3	9	0	3	2	1	0	21	1	1	0	2	1	0	1	0	0	0	6
46	female	15	1 2 3 5	36	2	90	52	11+A4365	77	61.57	62.75	16.43	52.7	183.1	162	163.33	191.33	411.67	416.67	353	427.33	1.5	3.3	2.7	4.6	5.7	5.9	5.99	5.85	5	2	6	0	0	2	5	0	20	3	1	2	1	0	0	0	0	0	0	7
47	female	37	1 2 3 5	120	2	67	48	48	74	75.7	71.23	34.2	79.57	259.33	287	280.33	221.67	438.33	543.67	580.67	553.67	6.2	6.1	8	10	5.05	4.92	5.06	4.8	6	2	8	0	2	0	8	0	26	3	2	1	3	0	0	0	0	0	0	9
48	female	32	1 2 3 5	120	2 3	121	82	133	168	65.97	69.43	11.73	62.13	190	145	166.67	192.67	443.33	446.33	469	597.33	5.3	6.2	5.6	8.7	4.78	5.5	5.78	5.94	5	7	2	5	1	5	1	0	26	3	2	3	2	2	0	1	0	0	0	13
49	female	32	1 2 3 5	12	2 3	50	26	50	40	52.97	52.67	3.8	60.37	284.67	255.33	298.5	301	564.67	531.67	582.33	693	6	8.3	6	10.8	4.82	4.85	4.62	4.65	4	1	1	0	0	0	0	0	6	1	1	3	3	1	0	0	0	0	0	9
50	male	28	1 2 3 4 5	24	1	94	66	0	78	56.13	31	11.2	61.7	245.33	222.33	280	235.67	436.33	509	542	556.67	11.9	14.4	8.33	12.4	5.28	5.42	4.5	5.46	9	7	7	9	7	0	5	0	44	3	1	2	1	3	0	1	0	0	0	11
51	female	37	1 2 3 4 5	6	1	34	40	81	136	34.2	52.07	18.7	49.57	147.33	138	201.07	197.33	359.33	462	526	520.67	7.6	10.3	11.7	8.7	5.39	5.36	5.46	5.31	6	6	6	3	3	0	0	0	24	1	2	2	3	2	0	1	0	0	0	11
52	female	48	1 2 3 4 5	48	1 3	33	56	62	42	58.03	50.23	30.03	45.03	191	166.33	183	188	404.33	442	408	572	5	12.6	4.9	19.2	4.36	4.79	4.62	4.49	10	10	3	2	5	0	0	0	30	2	2	3	3	3	0	2	0	0	0	15
53	male	29	1 2 3 4 5	60	2	91	69	83	59	36.2	59.9	22.77	63.27	253.67	251	262.33	304	473	552	625.67	550.33	7	9.7	13.2	10.1	5.59	5.78	5.35	5.87	0	0	0	0	0	0	0	0	0	0	2	2	2	0	0	0	0	0	0	6
54	female	36	2 3 4	72	1	63	40	85	24	175.67	64.33	59	58.67	15.23	74.99	57.97	69.67	386.67	334.33	472	546.67	2.5	4.9	6.5	9.6	4.57	4.88	4.78	4.98	7	3	5	0	0	0	0	0	15	2	2	1	3	2	0	0	0	0	0	10
55	female	35	2 3 4 5	12	2	188	72	48	246	19.97	52.9	13.37	46.07	186	187.33	205.33	219.67	333.66	431.33	563	515.33	2.3	2.8	1.7	6.8	5.4	5.48	5.18	5.02	1	0	0	2	2	0	0	0	5	1	1	3	1	0	0	0	0	0	0	6
56	female	39	1 2 3 4 5	42	1 4	61	11	105	55	50	33.73	45.8	56	185	184	279	290.3	358	333.3	505	514.3	7.5	9.8	12.9	4.6	4.64	4.82	4.6	4.76	2	0	5	1	0	1	1	1	11	1	1	2	1	1	1	1	0	0	1	9
57	female	29	1 2 3 4 5	120	1	168	30	65	81	25.13	56.93	44.17	57.3	241.33	226	301.33	317.67	479.67	560	497	625	4.9	5.8	5.3	3.9	4.96	5.4	5.26	5.17	7	7	5	5	4	4	1	0	33	2	2	1	1	2	0	1	0	0	0	9
58	male	18	2 3 4	36	2	105	71	221	44	50.47	72.27	36.97	63.83	224	197.33	267	292.5	465.33	455.67	530.33	449	3.3	7.3	6.3	4.6	4.59	4.84	4.59	4.49	6	0	0	2	0	2	0	8	18	1	3	3	1	2	0	0	0	0	0	10
59	female	44	2 3 4 5	72	1	1	0	25	3	71.9	61.13	5.83	65.43	124.2	110	203.67	188.33	245.33	257	412	409.33	3.9	7.9	9.7	7.9	5.68	5.55	5.11	5.2	3	4	2	0	5	0	0	0	14	0	1	1	1	1	0	1	0	0	0	5
60	female	34	1 2 3 4 5	12	2	13	37	84	55	63.3	70.53	21.3	52.3	175.67	224.33	259	258.67	280.33	334	343.67	514	2.5	4.9	6.5	9.6	4.89	5.11	4.49	4.82	1	1	0	0	2	5	1	2	12	1	2	3	1	1	0	0	0	0	0	8
61	female	23	1 2 3 5	36	2	63	40	85	24	69.43	57.47	72.13	78.27	196.67	166.67	216.33	214	452.67	453	449	455	5.4	6.8	5.1	4.1	4.8	4.33	4.52	4.54	5	4	4	0	6	0	2	3	24	2	1	3	2	1	0	0	0	0	0	9
62	female	20	2 3 5	24	2	58	25	73	140	64.3	79.5	71.43	80.63	208	179	264	231.33	386.67	334.33	472	546.67	7.5	10.2	9.9	11.2	4.63	4.86	4.26	4.73	3	5	0	0	2	0	0	0	10	1	0	1	0	2	0	1	0	0	0	5
63	female	25	1 2 3 5	18	2	61	4	88	57	57.7	25.77	28.53	46.37	196.33	131.33	232.67	207.75	419	323.67	332	443.5	4	16	6.7	8.3	4.9	5.09	5.33	5.49	6	9	8	0	3	0	0	2	28	1	1	2	1	2	0	2	0	0	0	9
64	female	60	1 2 3 4 5	12	1	9	16	66	70	15.23	74.99	57.97	69.67	151	134.33	161	293.33	512.667	498.67	502.33	547	1.4	4.4	5	5.3	5.13	5.16	5.42	5.17	0	1	2	0	0	0	0	0	3	3	2	0	3	0	0	1	0	0	0	9
65	female	44	2 3 4 5	12	1	17	32	80	24	56.47	70.27	22.23	67.2	199.67	160.67	227.67	217	344	353.33	414	454.33	2.4	3.8	2.6	4.5	4.92	4.91	4.9	4.92	5	3	2	0	1	0	0	0	11	2	2	0	2	1	0	1	0	0	0	8
66	female	18	1 2 3 4 5	12	1	68	31	110	116	58.93	54.8	40.17	36.4	205.33	156.67	218.33	224.67	416.67	357	359.33	533	3.4	1.6	3.8	13.6	4.87	5.33	5.02	5.21	0	5	3	2	5	0	3	4	22	2	3	3	0	1	0	2	0	0	0	11
67	female	35	1 2 3 4 5	24	2	62	18	45	62	37.8	33.17	6.7	45.57	143	115.67	159.67	159	345.67	409	336.3	430	6.9	4.1	5.2	2.9	5.56	5.36	5.33	5.09	4	7	4	3	7	4	3	0	32	1	1	2	2	1	0	1	0	0	0	8
68	female	46	1 2 3 4 5	48	1	44	8	14	55	62.9	51.43	33.63	72.67	166.33	199.67	208	298.5	462.33	650.33	474	602.5	6	9.4	5.5	6.3	5.67	5.62	5.38	5.61	5	3	2	0	2	2	0	2	16	3	3	3	3	3	0	1	0	0	0	16
69	male	43	1 2 3 4 5	6	1	16	12	32	18	48.13	47.93	26.4	52.4	180.33	178	291	230	442.33	507.33	341	391.67	16.1	20	7.67	10.9	5.59	5.49	4.86	4.81	3	4	2	0	3	0	3	0	15	2	2	1	3	1	0	2	0	0	0	11
70	male	64	1 2 3 4 5	120	1 3	150	70	267	94	62.1	58.43	53.2	66.53	164.67	134	199	230	616.67	532.33	586.33	423.33	16.5	12.2	23.1	15.1	5.12	5.3	4.83	4.64	4	3	3	3	0	0	0	1	14	1	3	1	3	2	0	1	0	0	0	11
71	female	41	1 2 3 4 5	6	2 3	18	26	37	52	28.63	76.43	43.73	59.17	144.33	126.5	177.33	173	321	248	493	418.33	5.7	7	6.6	5.1	5.22	5.51	5.38	5.37	0	4	4	0	1	0	0	2	11	2	2	2	1	2	0	1	0	0	0	10
72	male	35	2 3 4 5	24	2	129	72	175	279	56.68	56.82	60.63	40.63	318	204.67	269.33	262	425.67	392	444.33	514	0.2	5.7	10.8	5.8	5.72	6.03	5.55	5.78	4	4	4	4	4	4	4	4	32	2	2	3	1	1	2	0	0	0	0	11
73	female	31	1 2 3 4 5	120	1	47	13	61	51	45.07	59.43	45.25	50.32	199	176	218	185.33	373.67	348	380	411	7.3	8.5	11.7	9.3	5.87	5.77	5.78	5.99	2	7	6	0	7	0	0	0	22	3	2	0	2	1	0	2	0	0	0	10
74	male	23	2 3 4	36	2	72	35	152	114	44	0	9.6	93	188	174.67	231	232	460.67	365	231	232	7.8	13.2	7.2	5.6	5.9	6.05	6.1	6.23	2	0	3	0	0	0	0	0	5	2	2	2	3	0	0	0	0	0	0	9
75	female	21	1 2 3 5	36	2	72	6	91	74	56	35	43.32	58.31	187	163.67	217.5	215	413.5	328.67	320.5	433.67	10.3	7.4	1.7	8.4	4.95	5.05	4.85	5.17	1	3	2	1	0	1	0	0	8	3	2	2	3	1	0	0	0	0	0	11
76	male	25	2 3 4	36	2	77	71	63	68.5	53.9	83.5	41.35	60.9	193.33	194	202	271	429.33	284	504.8	450.67	2.8	3.1	7.4	5.5	5.41	5.5	5.19	5.64	2	3	1	4	3	4	4	3	24	3	2	1	3	1	2	1	0	0	0	13
77	female	21	2 3 5	84	1	55	36	100	68	65.7	54.1	40.7	73.5	182.33	115.33	246.67	161.67	455.67	325	419.67	474.67	4.4	4.7	3.8	8.6	5.76	5.87	5.59	5.69	5	6	1	1	0	0	0	0	13	3	2	2	3	2	0	1	0	0	0	13
78	female	25	1 2 3 4 5	96	2	188	129	253	138	26.2	44	34.3	40.7	223	209.5	186.33	277	449.5	412	470.33	621.67	9.3	7.2	10.5	8.3	6.07	5.79	5.9	5.6	1	0	1	1	0	3	0	1	7	3	3	2	2	0	0	0	0	0	0	10
79	female	21	1 2 3 4 5	24	1	80	69	96	51	60.9	61.8	38.7	63.2	186.5	136.5	206	218.33	410.5	350.5	351.67	420.67	5.9	7.2	8.3	6.6	5.83	5.97	4.91	4.78	4	7	5	2	7	2	0	2	29	2	2	1	2	2	0	1	0	0	0	10
80	female	16	1 2 3 4 5	12	1	62	86	67	126	53.3	61.06	54.2	60.87	169.67	139.33	198.67	148.33	272	266.67	328.33	465.33	4.8	3.1	0.5	4.6	5.12	5.04	5.23	5.43	6	2	7	1	0	0	1	0	17	3	2	2	3	2	2	1	0	0	0	15
81	female	22	2 3 4	8	2	70	66	89	43	54.23	61.67	61.5	67.9	209.33	127.5	222	212.67	344.33	428.75	395.33	455.67	4.6	3.7	1.3	3.5	4.99	5.6	5.43	5.55	5	0	5	5	3	0	0	0	18	2	1	3	2	1	0	0	0	0	0	9
82	male	42	1 2 3 4 5	96	1	52	21	21	0	57.4	77.5	52.6	55.5	168	334	227.5	252	604	466	432	755	10	7	5.3	12.2	6.01	6.17	5.91	6.03	1	1	1	0	0	4	0	0	7	3	3	2	3	1	3	1	0	0	0	16
83	female	43	2 3 4 5	7	2 3	58	42	55	128	70.17	74.5	52.8	67.3	190.67	176	216.2	200	357	457	539	498.5	15.8	12.4	17.2	13.9	4.78	4.93	4.76	4.62	3	3	3	0	2	0	0	0	11	2	3	2	3	1	1	1	0	0	0	13
84	female	24	1 2 3 4 5	24	1 3	80	37	53	48	42.6	62.77	46	74.97	179.33	140.67	249.5	192	370.33	436.67	406	511	2.5	1.5	0.6	2.9	4.43	4.63	4.71	4.59	7	0	4	3	3	3	3	3	26	2	1	3	3	1	1	0	0	0	0	11
85	female	24	1 2 3 4 5	144	2 3	143	96	138	190	50.8	55.9	55.17	41.33	210.67	147.33	227	202.33	481	450.33	507.67	507.33	1.9	5.2	12.8	4.1	5.87	5.88	5.4	5.73	5	4	4	7	4	0	0	0	24	3	2	3	2	2	0	0	0	0	0	12
86	female	20	1 2 3 4 5	36	1	79	59	183	84	70.83	65.8	67.07	57.5	149.33	128.33	217	203.33	458	404.67	458	459	6.5	3.3	9.3	4.5	5.69	5.33	4.56	5.09	1	0	1	0	0	0	0	0	2	2	2	2	1	1	0	0	0	0	0	8
87	female	21	1 2 3 4	48	2 3	85	29	65	48	68.63	64.67	50.2	67.63	199.33	144.67	249	227.67	483.33	367	447	403.67	2.2	2.1	1.9	4.2	5.87	5.83	5.88	5.84	7	3	3	0	0	0	0	0	13	2	1	3	2	1	0	0	0	0	0	9
88	female	36	2 3 4 5	24	1	128	53	62	64	66.37	70.5	36.4	67.43	165.67	123	189	196	357	516.33	372	421.33	0.7	1.8	0.7	5.7	5.49	5.4	4.85	4.92	9	5	3	0	3	0	0	0	20	2	1	2	3	3	0	0	0	0	0	11
89	female	31	2 3 4 5	12	1 3	0	35	57	209	65.9	40.9	63.4	45.7	148.67	166.33	168.67	211	283.67	440	401.33	546.67	0.7	7.2	5.4	7.1	5.44	5.68	5.63	5.32	0	0	2	0	0	0	0	0	2	1	1	3	3	1	0	1	0	0	0	10
90	female	27	1 2 3 4 5	60	2 3	73	81	60	76	65.53	70.8	32.33	73.1	218.33	238	204	204.33	482.67	593	396	57.33	2.4	6.3	5.4	4.3	5.83	5.82	5.52	5.7	1	3	3	0	3	0	1	2	13	1	2	3	2	1	0	1	0	0	0	10
91	female	42	1 2 3 4 5	24	2 3	42	57	35	45	66.33	69.95	26.03	48.4	119	161	130.33	100	644	440.67	483.67	763.33	3.9	2.9	13.6	10.8	4.69	5.23	5.95	5.07	3	5	3	2	3	0	0	0	16	1	2	3	2	1	0	1	0	0	0	10
92	female	23	1 2 3 4 5	60	1	182	209	161	75	68.77	47.6	51.13	71.8	174.67	172.67	177.33	213.33	446	390.67	379.33	468	2.3	2.3	4.2	0.9	5.26	5.39	5.22	5.42	5	6	2	0	0	0	0	0	13	1	2	2	1	1	0	0	0	0	0	7
93	female	21	1 2 3 5	60	1	91	71	124	64	67	67.8	42.53	69.37	173	148.67	206.33	195.33	365.33	369.67	414.33	380.33	1.3	6.2	24.3	1.7	4.72	5.04	4.9	4.9	7	7	4	0	7	7	0	0	32	1	1	2	1	3	0	1	0	0	0	9
94	female	19	2 3 4	24	1	82	55	69	54	74	69.7	32.47	68.83	212.67	164.33	249	211.67	364.67	261.67	364	456.33	2.3	4.5	2.1	3.9	5.33	5.41	5.03	5.21	2	0	7	0	0	7	0	0	16	1	1	1	0	0	0	0	0	0	0	3
95	male	36	1 2 3 4	36	1	77	99	50	150	34.17	26.93	37.23	43.43	260	254	289	297	469.67	501.33	543.67	563.67	2.3	4.6	5.2	3.7	4.93	5.35	5.32	5.5	0	0	3	0	0	0	0	0	3	0	1	2	1	0	0	1	0	0	0	5
96	female	29	1 2 3 5	72	1	68	63	54	71	47.8	50.53	50.13	50.6	156.67	130.33	203	163.33	359.33	520.33	392.33	469.33	1.7	7.7	1.3	10.1	5.85	5.85	5.88	5.85	5	3	0	0	2	0	0	0	10	2	2	1	2	1	0	0	0	0	0	8
97	female	49	1 2 3 5	24	1	65	18	78	87	56.67	70.57	69.9	71.8	161	140.33	231.67	198.33	332	297.33	452.33	622	2.9	1.9	4.8	2.6	5.65	5.65	5.38	5.53	6	2	8	5	2	2	0	1	26	3	1	1	1	2	0	0	0	0	0	8
98	female	26	2 3 4 5	84	2 3	82	33	110	57	78.8	63.23	66.33	73.47	157	136	226	175	312	514.67	416	493.67	4.4	7	6.1	9.7	5.69	5.69	6	5.87	5	3	5	3	2	0	0	0	18	3	2	3	1	2	0	0	0	0	0	11
99	female	18	1 2 3 5	60	2 3	79	18	102	94	46.7	39.84	56.77	61.67	172.33	162	224.67	213.33	505	374	463.67	535.67	11.1	6.2	22.7	3.5	5.6	5.57	5.48	5.47	5	8	3	0	8	0	0	0	24	1	1	3	0	2	0	1	0	0	0	8
100	female	24	1 2 3 5	60	1	136	22	159	60	34.33	39.23	49.9	51.37	214	126.33	242	204.33	406	292.33	350	448.67	1.9	6.6	19.7	6	5.76	5.8	5.6	5.74	5	6	7	4	7	4	2	0	35	1	1	2	0	2	0	1	0	0	0	7
101	male	49	1 2 3 4 5	24	2 3	55	86	143	131	20.03	31.1	60.67	35.77	296	300.667	160	311.667	562.667	545.667	644	501.333	13.6	17.7	3.9	10.3	5.47	5.59	4.93	5.49	5	8	8	0	5	3	2	5	36	2	2	2	2	2	1	2	0	0	0	13
102	female	23	2 3 4	24	1	20	7	79	79	56.2	29.2	65.2	57.2	176	107.33	164.33	229.75	299	451.667	446	420.25	4.6	3.1	2.3	5	5.15	5.95	4.63	5.43	8	3	0	1	3	3	0	0	18	2	2	1	1	2	0	1	0	0	0	9
103	male	23	1 2 3 4	96	1	74	59	85	116	55.1	53.3	40	55.9	177.33	145	149	172	505	523.5	365.33	517.67	12.3	21.9	1.3	9.3	4.9	4.92	5.88	4.92	7	0	0	3	0	3	0	0	13	2	2	1	1	2	0	0	0	0	0	8
104	female	38	1 2 3 4	6	2	38	62	128	91	55.53	54.23	73.6	50.5	182	119	195.33	303	506	507.33	364.67	411.67	6.1	4.3	2.3	13.9	5.48	5.29	5.33	5.06	5	4	5	3	1	0	0	0	18	2	2	2	1	2	0	1	0	0	0	10
105	female	44	2 3 5	6	1	16	45	0	28	60	58.07	71.7	54.6	125	76	119	121.67	533	409	469.67	355.3	5.5	6.4	2.3	10.5	4.54	4.84	5.83	4.97	5	7	2	0	7	0	0	0	21	3	1	1	1	2	0	2	0	0	0	10
106	female	39	2 3 5	8	2	53	16	73	45	58.93	43.73	70.4	59.77	196.67	145.67	174.67	226.33	410.67	396.33	358	564.67	13.2	17.2	1.7	16.8	4.86	5.29	5.4	4.98	7	8	0	0	7	10	0	0	32	2	1	2	3	1	0	2	0	0	0	11
107	female	50	1 2 3 5	6	2	34	9	42	27	40.03	34.83	48.4	29.67	210	203.67	173	196.67	369.33	500.67	382	482.33	25.8	25	2.9	22	4.78	5.36	5.68	5.86	3	3	5	0	3	0	0	0	14	2	1	1	1	1	0	3	0	0	0	9
108	female	47	1 2 3 4 5	180	1	52	11	87	7	59.53	55.43	71.8	56.6	131.67	131.67	212.67	185	359.67	503	369.67	509	4.7	4.6	4.5	8.1	4.61	4.62	5.82	4.58	6	3	2	1	0	0	0	1	13	1	1	0	3	2	0	1	1	0	0	9
109	female	44	1 2 3 4 5	6	1	0	4	182	0	24.57	34.34	69.37	27.53	179.33	152.33	260	211.33	477.33	499	261.67	528.67	21.5	27.2	4.2	30.8	5.55	5.35	5.23	5.74	10	10	10	6	6	6	0	10	58	3	2	1	3	3	2	3	0	0	0	17
110	female	44	1 2 3 4 5	144	1	89	28	91	102	51.93	57.23	66.33	35.57	283.75	196	265.33	284.33	500	464	501.33	602.33	7.8	10.4	5.7	8.1	5.33	5.78	5.39	5.76	3	0	2	2	0	0	0	0	7	3	1	0	2	1	0	0	0	0	0	7
111	female	31	1 2 3 4 5	36	1	159	37	82	171	49.03	50.67	68.77	49.7	173	154.33	364.67	228	454	480	361.2	552	11.6	9.2	7.1	9.1	5.31	5.84	5.04	5.86	8	3	0	0	2	0	0	0	13	3	2	2	2	2	0	1	0	0	0	12
112	female	28	1 2 3 4 5	156	2	47	11	77	20	44.67	57.03	67	65.3	150.33	131.67	469.67	199.67	304	414.33	393.63	331.67	5.2	6.9	4.3	9.1	5.41	5.64	5.41	5.03	2	1	2	2	1	2	1	0	11	3	2	1	2	1	0	0	0	0	0	9
113	female	25	1 2 3 5	12	1	56	33	68	23	51.63	49.4	74	52.97	165.33	134	259.33	179.33	378.67	344	441.67	435.67	6.3	122.2	10.8	16.2	5.17	5.56	5.35	5.49	1	10	3	0	8	0	0	0	22	1	1	0	0	0	0	2	0	0	0	4
114	female	40	2 3 4	156	1	42	11	65	32	55.63	47.93	31.27	58.4	169	173	283.75	232.5	362.33	453.33	362	509.5	6.8	3.4	3.3	9.7	5.44	5.74	5.85	6	3	0	1	0	0	0	0	0	4	3	1	0	3	0	0	0	0	0	0	7
115	female	21	1 2 3 5	12	1	69	72	82	102	48.67	48.37	80.2	67.36	98.8	81.67	173	192.67	361.2	357.33	410.67	492	8.4	8.1	2.1	8.7	5.29	5.44	5.65	5.42	5	5	3	1	3	1	0	0	18	3	2	1	1	1	0	1	0	0	0	9
116	female	35	1 2 3 5	12	1	145	46	79	43	70.63	75.6	69.87	90.4	217.67	184.67	181	277.33	393.63	440.67	369.33	526	8.7	6.9	1.8	6.9	4.16	4.14	5.69	4.35	10	5	6	0	6	6	0	0	33	1	1	2	2	2	0	2	0	0	0	10
117	female	23	1 2 3 4 5	24	2	94	28	136	62	40.6	48.2	1.8	60.67	217.33	178.67	197	205.67	441.67	510	381.67	501	5.3	11.2	7.2	6.6	5.43	5.59	5.57	5.46	7	4	4	0	6	0	0	0	21	3	2	2	1	2	0	0	0	0	0	10
118	female	30	1 2 3 4 5	24	2	94	89	93	81	54	32	18.7	65.2	173	119	173	146	362	354	412	527	13.8	19.8	2.3	23.5	5.16	5.81	5.9	5.7	1	1	2	2	2	3	2	3	16	2	1	2	0	1	0	1	0	0	0	7
119	female	28	1 2 3 4	12	1	54	58	85	75	32	25.8	26	40	160	158	196	228	286	358	478	438	5.5	6.9	10.8	14.9	5.4	5.62	5.33	5.17	0	1	0	0	2	0	0	0	3	2	1	0	0	0	0	1	0	0	0	4
120	female	23	1 2 3 4 5	120	1	96	119	159	90	68.23	31.27	13.07	73.6	164.33	148	163.67	152.33	443.67	382	460.33	335.33	3.6	3.9	2.4	6.6	5.33	5.39	5.59	5.47	7	5	0	2	2	5	0	1	22	2	2	2	3	2	0	0	0	0	0	11
121	female	35	1 2 3 5	48	1	20	1	99	92	61.53	80.2	20.8	71.7	149	168.67	197.33	181	307.67	404.33	441.33	430	4.9	4.4	9.6	7.3	5.2	5.6	5.78	5.52	10	5	10	10	5	4	10	10	64	1	1	1	3	3	0	1	0	0	0	10
122	male	23	2 3 4	72	1 3	232	85	175	87	45.8	69.87	64.5	70.4	195.33	180.66	279	254.33	472	417.67	598.67	513.67	8.5	17.4	11.1	9.2	5.31	5.25	5.53	5.28	1	1	3	0	0	0	0	1	6	3	0	0	0	0	0	0	0	0	0	3
123	female	32	1 2 3 4 5	6	1	54	79	19	22	57.27	36.83	36.57	67.17	215	219.67	211.5	236	339.3	314.67	363.2	479	2.7	3.9	6	2	5.38	5.55	5.73	5.6	4	4	5	5	4	0	6	0	28	1	1	0	1	2	0	1	0	0	0	6
124	female	36	2 3 4 5	6	1	12	6	20	56	80.17	80.27	55.2	83.03	119.33	146	190	184.33	311.67	405.33	411.67	401.1	10.6	10.6	21	15.3	4.42	4.59	4.58	4.39	6	2	4	6	7	0	2	1	28	1	1	1	3	2	0	1	0	0	0	9
125	female	28	1 2 3 5	120	1	69	16	25	39	70.23	69.7	30.63	61.17	170.33	133	180	232	423.33	527	417	473.67	6.5	24.9	11.7	11.7	4.96	5.33	5.38	5.45	8	6	6	6	6	3	4	0	39	1	1	1	3	2	0	1	0	0	0	9
126	female	19	1 2 3 4 5	24	2 3	121	70	161	95	65.13	61.7	52.77	59.77	202	148	244.67	188	434	391.67	412.67	453	5.5	6.3	4.3	6.6	5.31	5.38	4.95	5.09	4	8	3	0	3	0	1	1	20	2	1	3	2	1	0	1	0	0	0	10
127	male	26	2 3 5	24	1	72	117	95	51	40.43	53.37	62.7	46.2	223.67	126.67	223	187	464.33	441	497	416.33	17.5	4.5	3.9	7.4	5.15	5.32	5.13	5.38	8	3	6	1	0	0	5	0	23	2	2	1	2	2	0	0	0	0	0	9
128	female	42	1 2 3 5	48	1	5	0	7	20	55.83	78.13	58.77	64.07	168.33	142.67	200.33	205	369	404.33	419	513	4.1	4.1	14.8	17	4.43	5.12	4.5	4.54	8	10	10	0	8	0	0	5	41	1	1	1	3	2	0	1	0	0	0	9
129	male	21	2 3 5	6	2 3	94	70	40	58	31.3	52.53	40.8	52.59	239.33	220.67	245.67	296	458.67	484.33	577	542.3	10.2	4.3	5.6	7.1	5.18	5.33	4.96	5	2	1	0	1	1	0	0	0	5	2	2	3	3	1	0	1	0	0	0	12
130	female	25	1 2 3 5	120	2 3	35	12	50	42	52.33	60.53	42.33	53.73	163.5	136	153.67	159.33	318.75	335	407.67	407.33	5	8	4	6.1	5.6	5.9	5.85	5.82	8	6	4	4	6	6	0	0	34	1	1	3	1	3	0	1	0	1	0	11
131	female	25	1 2 3 4 5	24	2 3	46	51		64	46.7	43.37	46.7	52.87	206	135.33	276	181	526.33	566.67	348	564.67	10.7	16.8	8.1	15.6	5.19	5.6	5.21	5.74	6	6	2	2	5	0	2	0	23	3	2	3	2	2	0	1	0	0	0	13
132	female	31	1 2 3 4 5	24	1	93	16	152	105	38.67	66.47	31.92	66.03	136.33	102	200	148	401.33	365.33	379	486.5	3.2	6.8	3.1	1.4	5.17	5.05	4.8	4.98	1	3	5	1	5	1	0	0	16	3	1	0	1	1	0	2	0	0	0	8
133	female	33	1 2 3 4 5	6	2	143	13	31	109	44.3	60.5	42.37	65.67	194.67	82	216.67	173.67	397.67	438.67	405.67	467.33	9	19	5.6	9.7	5.04	5.09	5.23	4.88	5	5	6	4	4	5	5	5	39	2	1	2	1	2	0	2	0	0	0	10
134	female	52	1 2 3 4 5	120	1	121	20	40	43	40.18	52.4	45.52	56.38	153	177.33	217	204.33	414	389.67	496.67	504.67	4.1	6.3	5.3	6.4	5.6	5.73	5.51	5.19	6	5	4	6	0	0	5	6	32	2	1	0	2	2	0	2	0	0	0	9
135	female	51	1 2 3 4	96	1	13	1	24	46	49.5	45	46	46.4	130	118	156	191	315.67	321	440	469.33	4.4	7.9	14.9	14.6	5.2	5.14	5.76	5.43	0	3	2	0	4	1	1	0	11	1	1	0	3	1	0	2	0	0	0	8
136	female	43	2 3 5	10	1	65	41	57	53	46.7	31	44	55.9	226	201.67	242.5	223.5	329	563.67	482	526.5	9.3	10.9	4.8	6.3	5.45	5.75	5.12	5.14	7	1	5	0	0	4	6	0	23	3	2	1	3	2	0	1	0	0	0	12
137	female	21	1 2 3 5	96	1	196	206	234	221	58.87	27.43	57.8	52.17	203.67	154	214.33	213.67	513.67	351.5	466	511.33	4.7	7.4	9.7	7.3	5.48	5.72	5.84	5.88	4	0	2	0	0	2	0	0	8	1	1	2	2	1	0	0	0	0	0	7
138	male	18	1 2 3 4	72	1	172	68	213	136	44.37	27.57	65.93	48.2	165	135.33	223	221.33	449.33	425	501.33	516.33	6.3	8.4	6.5	6.4	4.89	4.99	4.56	5	10	5	0	0	9	9	0	0	33	3	2	1	2	3	0	1	0	0	0	12
139	male	22	2 3 4	72	1	42	55	196	47	19.77	16.33	60.8	29.67	250	215.33	246.33	324	364.33	496	402.67	389.67	14.5	27.2	3.3	29.3	4.76	5.72	4.42	5.56	4	5	3	0	0	0	0	0	12	2	1	1	0	2	0	1	0	0	0	7
140	female	19	2 3 5	8	2	50	29	172	98	43.8	35	78.57	49.2	153.33	114.67	181	219.33	382.33	414.67	486.67	434.33	5.8	6.9	2.1	5.6	5	5.13	4.96	5.28	5	3	0	0	0	0	0	0	8	1	1	1	1	1	0	2	0	0	0	7
141	male	22	2 3 4	48	1	41	44	42	65	38.07	31.57	43.77	49.43	291.67	202.67	268.33	281.33	425.33	526	4.2	572.67	9.6	13	1.8	12.8	4.32	4.55	5.31	4.62	5	4	5	4	0	0	0	0	18	1	1	1	0	2	0	1	0	0	0	6
142	female	40	1 2 3 4	10	2	8	6	50	13	31.57	50.9	67.4	47.1	139.67	99	170.33	157	321.33	364	626.33	426.33	6.1	5.4	7.2	5.6	5.78	5.22	5.15	5.6	3	3	3	0	2	0	0	0	11	2	1	1	1	1	0	1	0	0	0	7
143	female	24	1 2 3 4 5	6	2	128	94	41	83	39.3	56.93	54.4	48.87	190.67	157	279.33	239.33	470	530.33	534.33	432.33	4.4	7.2	4.4	7.2	5.29	5.59	4.43	5.84	5	0	0	0	0	0	0	0	5	1	1	3	1	1	0	0	1	0	0	8
144	female	35	1 2 3 4	24	2	75	39	8	60	58.27	49.97	52.33	72.6	123.4	148	147.5	226.33	423.67	472.67	552.5	502.33	2.9	5.1	17.4	2.4	5.02	4.87	5.18	4.84	7	7	3	0	3	0	0	0	20	1	1	2	1	1	0	1	0	0	0	7
145	female	22	1 2 3 4 5	36	2	109	37	128	71	39.47	53.57	63.23	35.5	221.67	172.33	150.33	186.33	522.67	442	405	601	4.8	3.8	3.9	9.1	5.28	5.55	5.84	5.73	0	0	3	0	0	0	0	0	3	1	1	3	2	0	0	0	0	0	0	7
146	female	36	1 2 3 4 5	240	2	89	64	75	75	64.1	67.6	61.3	75.1	253.33	211	156.67	208.33	441	473.67	442	585.33	9	10.4	10.6	10	5.48	5.87	4.84	5.64	6	2	2	0	3	0	0	0	13	1	2	3	3	2	0	1	1	0	0	13
147	female	23	1 2 3 4 5	12	2	150	58	109	131	47.8	51.5	53.2	52.37	217.67	188.67	158	221.33	414.33	368	341.33	509	7.8	5.4	6.6	9.2	5.43	4.99	5.73	5.03	5	0	3	0	3	0	0	0	11	2	1	3	2	1	0	0	0	0	0	9
148	female	16	1 2 3 4 5	24	2	68	33	89	71	47.75	51.43	81.53	45.37	155.33	115.67	305	208.37	374.33	456.33	362.67	438.67	2.4	3.6	23.5	5.7	4.77	5.3	5.33	5.09	1	0	1	0	0	0	0	0	2	0	1	3	0	0	0	0	0	0	0	4
149	female	23	2 3 5	48	2	94	68	150	82	61.43	34.83	39.83	54.83	213.66	168.4	170.33	238	443	624	517	520	9.4	9.99	14.9	8	4.88	5.33	5.12	5.35	3	9	4	9	8	0	3	0	36	1	2	2	1	1	0	3	0	0	0	10
150	female	18	1 2 3 4	48	2 3	68	69	112	68	36.53	43.63	13.4	58.57	228	190.67	271.67	290.67	357	356.67	555	470	8.6	7	6.6	5.5	5.28	4.95	5.15	5.15	0	0	0	0	0	0	0	0	0	0	1	3	0	0	0	0	0	0	0	4
151	male	36	2 3 4 5	36	2 3	88	45	152	52	41.2	51.13	42.37	66.47	339.33	315.67	282.33	393.67	511.67	544.67	631	560.67	2.1	4.7	7.3	8.9	5.25	5.31	5.32	5.32	0	0	0	0	0	0	0	0	0	2	3	2	3	0	0	1	0	0	0	11
152	female	49	1 2 4 5	48	2	23	23	22	183	34.67	75.63	41.6	74.03	199.67	220.67	239.5	272	421.33	371.67	379	566.33	1.5	2.2	5.9	3.8	5.72	5.5	5.3	5.33	3	6	3	2	0	0	3	0	17	1	1	2	2	1	0	0	0	0	0	7
153	female	31	1 2 3 5	36	1	116	34	70	100	64.63	73.6	54.7	70.33	190.67	183	198	259.33	386	384.5	463.37	583	5.7	7.6	31.5	8.5	5.16	5.26	4.53	4.87	6	7	6	3	7	0	3	0	32	2	2	1	2	2	0	1	0	0	0	10
154	female	30	1 2 3 4	60	1	65	3	192	62	63.37	62.33	43.6	66	174.33	150.33	209	232	404	410.33	429	407	9.2	1.3	6.8	5.7	5.81	5.7	5.32	5.5	7	5	5	3	6	2	5	5	38	2	1	2	1	2	0	2	0	0	0	10
155	female	18	1 2 3 4 5	60	2 3	209	87	185	254	61.27	71.7	67.7	49.57	181	149	213.67	171.67	464.67	425	396.67	440.67	2.5	1	1	3.6	5.28	5.34	5.12	5.33	3	0	0	5	0	0	0	5	13	3	1	3	2	1	0	1	0	0	0	11
156	female	23	1 2 3 5	72	2 3	55	26	98	61	61.4	70.93	64.07	61.57	195.67	162	244	246.33	365	288.33	445	356	4.4	7.5	4.8	5.7	5.41	5.24	5.18	5.23	0	10	8	10	10	10	8	10	66	0	1	2	2	0	0	1	0	0	0	6
157	female	22	1 2 3 4 5	12	2 3	138	173	230	149	49.03	29.23	47.53	57.7	196.33	214	165.33	181	427.67	416.67	463.67	638.67	5.5	7.1	5.1	11	5.43	5.74	5.63	5.83	3	5	7	2	4	0	1	7	29	2	2	3	2	1	0	1	0	0	0	11
158	female	21	1 2 3 4 5	60	2 3	227	180	197	190	47.93	50.97	45.67	57.77	261.67	230	240.3	268.33	457.33	494	290	502.33	2.1	3.3	1	3.5	5.39	5.05	5.13	5.23	0	0	1	0	0	0	0	0	1	0	1	3	2	0	0	2	0	0	0	8
159	female	19	2 3 4 5	72	2 3	138	53	178	90	61.47	48.33	55.87	59.77	211.67	187.33	312.5	170.33	517	496	347.2	619	10.3	4.7	8.4	7.5	5.77	5.49	5.75	5.72	2	4	0	0	2	5	0	0	13	1	1	3	0	1	0	1	0	0	0	7
160	male	21	1 2 3 4 5	48	1	75	85	86	63	36.3	35	41.17	49.93	205.67	188.33	213.67	279.33	502.67	546.33	538.33	594.33	6.3	8.9	16.4	5.8	5.04	5.36	4.65	5.48	4	5	3	3	5	3	3	0	26	3	1	2	2	1	0	2	0	0	0	11
161	female	25	1 2 3 4 5	120	2 3	74	37	100	44	61.3	64.97	61.23	53.73	200	125.33	229.33	182.67	478	514.33	440	444	7	8.3	4.4	6.2	5.21	4.97	4.83	5.03	5	8	8	3	8	1	7	3	43	3	2	3	3	2	0	1	0	0	0	14
162	female	29	1 2 3 4 5	24	2 3	116	69	209	150	53.2	49.83	36.23	60.8	222	130	156	186	405	318.33	338	435.67	2.8	5.8	3.1	3.6	5.22	5.63	5.87	5.59	7	5	9	3	5	0	2	0	31	1	1	3	3	3	0	1	0	0	0	12
163	female	22	1 2 3 4 5	24	1 3	66	45	116	72	31.5	77.7	69.8	78.57	297.1	151	221.33	181	442	407	437	402.67	3.5	3.9	3.4	4.6	5.22	5.33	5.09	5.43	1	0	2	0	2	0	0	0	5	3	1	3	1	1	0	0	0	0	0	9
164	female	39	1 2 3 4 5	120	1 3	76	32	67	86	39.83	45.23	40.97	43.77	181	183	221.33	236	341.33	421	363	486.67	8.1	8.2	4.1	6.2	5.67	5.73	5.86	5.77	2	3	6	0	0	0	0	0	11	2	1	3	2	1	0	0	0	0	0	9
165	female	21	1 2 3 5	7	2 3	46	58	142	21	73.03	60	64.27	67.4	133.67	147.5	153.67	165	362.67	322.5	357.67	142	0.8	4.8	5.9	4.2	5.44	5.78	5.73	5.83	5	4	0	0	5	3	0	6	23	1	1	3	1	0	0	0	0	0	0	6
166	male	21	2 3 4 5	12	2	70	24	138	24	32.37	37.5	41.2	54.4	194.33	150.33	228	171.67	482.33	571.33	357	626.33	7.9	16.5	6.6	16.2	5.25	5.6	5.38	5.68	7	3	1	0	0	2	2	0	15	2	1	2	1	3	1	1	0	0	0	11
167	female	30	1 2 3 4 5	24	2 3	41	55	227	43	47.93	55.77	34.67	52.33	175	156.67	239.33	139.67	425	510.67	511.67	534.33	11.6	15.6	23.5	16	5.18	5.32	5.62	5.31	0	5	2	0	2	0	0	0	9	0	2	3	3	0	0	1	0	0	0	9
168	female	43	2 3 4 5	6	2	56	29	138	29	46.87	37.37	64.63	63.23	187	158	199.67	202	425	366	421.33	552.5	5.5	11.4	14.9	5.2	5.6	5.12	5.65	5.19	0	5	3	0	0	0	0	0	8	0	2	2	1	0	0	1	0	0	0	6
169	female	26	1 2 3 4 5	7	2 3	75	55.5	75	60	36.1	32.9	63.37	43.4	158	106	190.67	171.67	330	433	386	459	16	12	6.6	15.1	4.68	4.85	5.78	4.86	3	8	4	1	5	4	0	5	30	2	2	3	2	2	0	2	1	0	0	14
170	female	29	1 2 3 4	36	1	39	28	74	83	67.1	74.27	61.27	69.13	198	164	174.33	277	397.33	373.67	404	537	3.9	3.5	7.3	8	5.31	5.26	5.42	5.31	5	0	5	0	0	3	0	0	13	1	1	1	2	2	0	0	0	0	0	7
171	female	39	1 2 3 4 5	12	2	52	51	116	55	60	54.93	61.4	68.63	178	131.67	186	182.67	310.33	329	464.67	465.67	4	2.8	8.9	3.1	5.44	5.45	4.99	5.54	5	5	8	0	7	0	7	0	32	2	1	2	2	2	0	1	0	0	0	10
172	female	40	2 3 4 5	144	2	9	4	173	46	32.9	33.13	49.03	44.87	132	122	181	157	300.33	408.67	560.67	423.67	4.5	3	8.3	1.5	5.57	5.69	5.81	5.33	9	7	2	0	2	0	0	0	20	2	1	2	2	3	0	2	0	0	0	12
173	female	24	1 2 3 4 5	36	1	7	38	180	8	61.87	62.23	59.77	41.03	96.67	51	236	121	397	493.67	566.33	580	6.2	6.6	5.8	5.3	5.09	5.38	5.73	5.27	7	7	3	0	0	6	5	0	28	2	2	2	2	2	1	1	1	0	0	13
174	female	24	1 2 3 4 5	144	2 3	89	152	260	51	52.3	26.53	47.17	51.43	181.33	160	222.33	179.67	392	416.33	452	449.33	4.8	10.8	3.9	9.8	5.09	5.28	5.16	5.09	5	9	3	1	8	1	3	0	30	3	1	3	1	2	0	1	0	0	0	11
175	female	26	1 2 3 5	12	2	35	13	32	13	64.93	56.7	16.63	44.6	147.67	86.67	154	170.33	329.67	358.33	372	407.33	9.8	18.5	2.2	8.5	5.38	5.53	5.38	5.4	8	7	7	0	4	0	1	1	28	1	1	2	2	3	0	1	0	0	0	10
176	female	18	1 2 3 4 5	6	2 3	39	31	44	37	28.5	35.6	38.93	47.47	206.3	153	230	245.3	428.67	516.67	425	360.3	7.8	11.9	7.7	8	5.62	5.92	5.33	5.55	5	6	5	6	6	0	0	0	28	2	2	3	2	2	0	1	0	0	0	12
177	male	21	1 2 3 4	12	2	220	54	267	178	51.87	66.1	53.6	56.3	168.33	151	212	210.67	438.33	384.33	513.33	448	3	6.6	9.1	8.1	5.65	5.9	5.41	5.35	5	1	2	2	1	0	0	0	11	3	3	2	3	2	0	1	0	0	0	14
178	female	54	2 3 4 5	60	1	48	6	20	21	28.73	64.67	49	42.17	191.33	174.67	186	261	281	288	333.33	444.5	4.9	2.4	3.8	13.7	5.78	5.63	5.52	5.72	2	8	8	4	0	0	0	0	22	1	1	2	2	1	0	3	0	0	0	10
179	female	27	2 3 5	60	1	8	6	74	36	34.9	47.8	49.4	33.7	135.67	125.5	172.67	161.5	304	509	437	494	8.7	12.8	15.1	9.3	5.42	5.81	5.52	5.56	0	0	1	0	0	0	0	0	1	2	2	1	2	0	0	0	0	0	0	7
180	female	25	2 3 5	96	1	40	52	110	49	69.4	60.1	50.1	76.44	182.33	194.67	257	154.5	299.33	401.67	376	410.5	7.2	7.6	2.5	6.3	4.99	5.73	5.39	5.61	4	5	5	4	0	3	6	2	29	3	2	2	2	1	0	2	0	0	0	12
181	female	27	1 2 3 4	120	2 3	70	54	135	54	64.7	59	52.3	73.83	164.67	144	196.67	183	343.67	400.67	424	425.67	5.9	8.6	11.4	6.1	5.91	5.87	5.64	5.66	0	3	1	0	3	0	0	0	7	1	1	3	1	0	0	0	0	0	0	6
182	male	33	2 3 4	12	2 3	89	65	157	65	60.57	64.4	54.73	55.47	226.67	248.67	224.67	317.67	400.67	522.33	705	514	3.9	5.8	9.6	7.3	6.05	6.08	5.16	5.53	0	0	0	0	0	0	0	0	0	1	2	2	2	0	0	0	0	0	0	7
183	female	22	1 2 3 5	24	1	114	71	138	171	64.83	70.13	65.93	54.03	198	112.33	219.67	194.67	402.33	330.33	386	560.67	1.3	2.2	2.4	3.5	4.83	5.28	5.1	5.19	5	1	1	0	3	1	0	0	11	2	1	2	2	2	0	0	0	0	0	9
184	female	44	1 2 3	24	1	0	0	260	0	35.73	12.97	54.97	38.17	155.33	103	248	190.3	405.33	361.67	472	56.67	19.3	20.3	10.3	13.9	5.51	5.73	5.85	5.41	10	9	6	10	10	2	2	2	51	3	3	0	0	3	2	3	1	1	0	16
185	female	43	1 2 3	12	1	13	6	32	30	46.57	32.57	34.97	46.2	144	111.667	267.61	185	339.667	418	368	479	21.7	27.3	6.3	19.1	5.38	5.67	5.4	5.84	6	6	3	0	2	2	0	0	19	2	2	0	2	2	0	2	0	0	0	10
186	female	46	1 2 3	12	2	42	12	44	32	69.77	34.53	51.67	73.03	164.33	87.5	212.67	181	366.33	533.75	315.67	516	11.1	20.9	7	9.7	5.36	5.75	5.47	5.64	6	1	0	1	1	0	1	0	10	2	3	1	2	2	1	1	0	0	0	12
187	female	40	1 2 3	24	2	124	121	267	65	43.9	25.33	28.33	56.27	210	153.67	206.67	269	396.75	496.33	437.33	528	6.2	7	2.8	10.9	11	5.33	5.31	5.25	3	6	3	0	6	0	0	1	19	1	1	2	0	2	0	2	0	0	0	8
188	female	17	1 2 3	48	1	128	38	20	28	40.05	20.97	61	44.9	165.667	162.667	276.33	200.33	446.667	432	405	494.667	8.5	29	3.5	9.6	4.87	5.85	5.32	5.98	9	4	0	0	0	0	0	0	13	3	2	2	1	2	0	2	0	0	0	12
189	female	30	1 2 3	6	2	30	27	74	17	41.53	47.17	65.47	55.4	134.33	68.33	231.83	163.33	438.67	422	460.33	423.33	29.3	24.9	10.5	19.9	5.38	5.4	4.87	5.41	9	5	2	2	6	0	0	0	24	2	2	2	1	2	1	1	0	0	0	11
190	female	19	1 2 3	24	2 3	66	112	110	109	60.13	41.93	50	53	178	132.33	209	193	488.33	508.67	329.33	476.67	2.8	10.5	3.6	10.3	5.08	5.47	5.77	5.19	5	1	3	0	0	1	0	1	11	2	2	3	2	1	1	0	0	0	0	11
191	female	34	1 2 3	96	2	21	51	35	37	60.2	51.2	21.87	53.83	190	160	90.67	217	362	488	451	497	5.5	3.6	7.2	7	5.51	5.31	5.46	5.4	0	1	3	0	3	0	0	0	7	1	2	2	3	1	0	1	0	0	0	10
192	female	24	1 2 3	156	1	25	15	157	29	57.73	26.3	59.4	54.97	149.67	111.33	103	216.67	361.33	493	399.67	524.67	3.3	7.2	13.8	6.5	5.3	5.32	4.35	5.38	7	7	5	0	3	0	3	0	25	3	1	1	2	2	0	2	1	0	0	12
193	male	49	1 2 3	6	2	2	1	138	3	51.3	36.23	51.67	34.97	145	166	149.67	129.67	297	399	492	429.67	14.6	13.8	5.5	15	4.6	4.87	5.44	4.53	1	0	0	0	1	0	1	0	3	1	1	1	3	0	0	0	0	0	0	6
194	female	29	1 2 3	6	1	25	45	187	35	70.57	66.4	78.47	51.67	127	125.33	227	153	377	419.33	424	494.33	3.1	5.5	6.2	10.8	5.41	5.77	5.1	6	5	7	7	0	2	0	0	0	21	2	1	1	2	2	0	1	0	0	0	9
195	female	24	1 2 3	24	2 3	44	43	44	33	53.8	54.37	39.17	58.33	145.67	114.33	145.67	190.67	466.33	478.67	510.33	538.67	11.4	12.3	4.2	6.9	5.32	5.46	4.19	5.47	6	9	1	0	8	0	0	0	24	3	2	3	2	2	0	2	0	0	0	14
196	male	17	1 2 3	120	1	7	20	80	42	43.6	20.3	52.1	61	109	84.33	209	177.67	420.3	460.67	521.33	429.67	17.7	7	16.2	24.6	4.35	4.7	5.16	4.67	5	3	3	0	0	0	0	0	11	3	1	1	1	2	0	1	0	0	0	9
197	female	25	1 2 3	36	2	13	21	83	79	45.39	39.23	64.4	65.47	168.33	110.33	168.33	214.67	316.33	317.67	467	413.67	8.5	13.3	16	7.1	5.44	5.42	4.43	5.48	2	4	2	0	5	0	4	0	17	1	1	1	1	0	0	1	0	0	0	5
198	female	44	1 2 3	36	2	54	62	52	62	74.83	67.07	20.13	62.73	307	197.33	300.67	211.67	577.67	496	478.33	490	6.4	6	5.2	4.8	5.1	5.41	4.91	4.87	5	2	2	2	0	0	0	0	11	1	1	2	3	1	0	0	0	0	0	8
199	female	39	1 2 3	84	1	22	24	62	44	44.9	56	37.3	60	213	191	217	235	394	521	430	478	6.2	13.9	7.1	15.3	4.19	5.03	5.05	4.85	5	4	8	0	4	0	0	0	21	1	1	2	3	2	0	0	0	0	0	9
200	female	23	1 2 3	72	2 3	54	62	76	69	52.97	68.3	26.97	69.3	157.67	132.33	157	146.67	373.67	429.33	437.33	473	4.6	11.6	6.8	7.7	5.16	5.85	5.39	5.51	8	7	3	0	0	0	0	0	18	2	1	3	3	3	0	1	0	0	0	13
201	female	34	1 2 3	24	1	42	10	18	30	30.33	34.17	16.33	42	172.67	176	262	233.3	316.67	456.67	425.67	414	15.8	25.2	11.7	15.2	4.43	4.94	5.38	4.81	4	5	8	1	5	8	1	1	33	1	1	1	2	2	0	2	0	0	0	9
202	female	31	1 2 3	12	2 3	27	36	0	97	57.27	77.9	34.37	73.4	161.67	183	296	250.67	354.33	379.33	446	526.67	9.3	11.9	16.1	11.2	4.91	5	4.68	4.88	0	0	2	0	0	0	0	0	2	1	1	3	2	0	0	0	0	0	0	7
203	female	18	1 2 3	8	2 3	85	34	289	41	53.5	62.67	52.2	56.1	193	176	266.33	220.67	467.23	437.33	497.67	486	2.2	6	5.3	6.5	5.53	5.46	4.69	5.17	2	0	3	0	0	0	0	0	5	2	1	3	2	1	0	0	0	0	0	9
204	female	39	1 2 3	24	2	63	36	64	81	58.1	47.9	23.9	54.37	203.33	163.33	229	224	405.67	533	512	533	6.4	5.1	3.5	5.9	5.45	5.71	5.42	5.36	8	1	1	0	6	0	0	0	16	3	3	1	3	0	0	1	0	0	0	11
205	male	35	1 2 3	60	2	14	19	26	22	21	50	36	46.6	183	209	197	243	508	548	620	695	7.1	10.9	4.4	9.2	4.03	5.6	5.86	5.55	0	8	3	0	0	0	2	0	13	2	3	3	0	1	2	2	1	0	0	14
206	female	25	1 2 3	24	2	28	0	182	0	35.97	21.87	83.2	48.23	142	142.8	210.8	170.67	293	368	250.3	399.67	8.4	11.1	9.5	7.9	4.97	5.51	5.21	4.99	6	8	8	1	5	0	0	0	28	2	1	2	2	2	0	1	0	0	0	10
207	female	21	1 2 3	84	2 3	22	31	51	28	43.78	59.4	96.5	55.9	148	103	215.2	173	369	471	578.4	492	8.5	9.7	18.4	9.9	4.71	4.67	5.21	4.76	8	8	8	0	0	0	0	0	24	2	1	3	0	3	0	2	0	0	0	11
208	male	21	1 2 3	60	1	187	98	0	180	45.47	51.67	11	52.67	200	149.67	208	263.67	472	505.33	262.52	424	4.3	9.2	7.89	6.2	5.44	5.59	5.21	5.56	7	5	4	7	0	0	0	0	23	2	1	1	1	2	0	1	0	0	0	8
209	female	37	1 2 3	60	1	44	26	142	44	39.33	78.47	63.87	81	214.33	194.33	280	248	368	419	443	510.33	4.7	5.5	7.7	7	5.03	5.41	4.85	5.24	0	8	0	0	6	0	0	0	14	1	1	1	2	0	0	1	0	0	0	6
210	female	51	1 2 3	24	1	80	21	42	103	19.47	39.17	35.4	59.97	198	182.67	176	267.61	315.67	351.33	444.67	521.33	10.2	13.3	11.7	18.9	5.55	5.48	5.29	5.24	1	7	7	0	4	0	0	0	19	1	1	0	1	0	0	2	0	0	0	5
211	female	37	1 2 3	12	1	83	46	38	61	51.5	52.1	31.7	64.73	168.33	172.33	215.33	212.67	437.33	443.33	347	467	2.5	4.7	1.6	4.4	4.47	4.71	4.67	4.66	2	2	0	0	2	0	0	0	6	2	1	1	2	1	0	1	0	0	0	8
212	female	28	1 2 3	24	1	52	36	62	25	62.2	70.8	56.2	63.65	183	154.5	203.33	206.67	405	380.5	449.33	478.33	6.4	5.4	7.2	9.8	5.84	6.08	6.17	5.85	1	2	1	0	1	0	0	0	5	3	1	1	3	1	0	1	0	0	0	10
213	female	43	1 2 3	24	2	62	37	187	105	53.87	45.57	26.8	44.37	202	163.33	256.38	276.33	460.33	502.33	295.67	520.67	8.4	2.3	8.3	9.2	5.39	5.6	5.21	5.79	1	1	4	0	1	0	3	1	11	1	1	2	2	1	1	1	0	0	0	9
214	female	15	1 2 3	12	1	76	19	102	136	55.7	82.4	54.27	20.1	188.83	130.67	219.75	231.83	329.33	267.67	495.75	467.67	4.3	2	11.7	9.4	5.14	5.29	4.56	5.13	1	2	1	1	2	1	1	0	9	1	0	0	1	1	0	1	0	0	0	4
215	female	59	1 2 3	120	2	18	5	187	19	46.2	42.37	59.33	65.37	170	226	191.33	317.3	451	537	541.67	505.3	7.9	9.9	13.9	12.7	4.26	4.71	5.32	4.5	5	1	1	0	0	0	4	0	11	2	2	1	3	1	0	1	0	0	0	10
216	female	31	2 3 5	24	2 3	0	0	44	0	54.2	54.18	14.23	45.17	150.25	145.1	184	175.667	363.25	500	485.67	529	11.2	11.5	17	13.9	5.59	5.96	5.75	5.59	1	5	5	0	4	0	0	2	17	3	1	3	3	1	0	2	0	0	0	13
217	female	30	1 2 3 5	36	2 3	289	188	80	237	43.6	39.9	64.77	54.23	175	121	156.33	157	478	526	520.67	626	23.6	21.8	6.9	17	5.55	5.32	4.76	5.41	1	3	1	1	1	0	0	0	7	3	1	3	0	1	1	1	0	0	0	10
218	female	27	2 3 5	48	1 3	18	30	83	18	47.8	56.7	27.9	64.97	160.33	161.667	232.5	212	260.66	351	583.33	488	7.5	9.5	23.2	16.9	5.2	5.75	5.12	5.75	4	4	1	0	1	0	0	1	11	3	1	3	0	1	0	1	0	0	0	9
219	female	26	2 3 5	6	1 3	13	1	52	15	49.07	28.07	22.03	56.67	112	69	220.67	312	260	382	445.67	425	9.1	18.4	1.8	23.2	4.22	4.76	5.45	4.94	3	3	0	0	3	0	0	0	9	3	1	3	0	1	0	1	0	0	0	9
220	female	31	2 3 5	48	2	94	68	62	82	61.43	34.83	23.63	54.83	213.66	170.33	231.33	238	443	517	389	520	9.4	6.8	9.5	8	4.88	5.12	5.23	5.35	5	9	6	5	5	5	5	5	45	3	1	1	3	2	0	2	0	0	0	12
221	female	22	1 2 3 4 5	84	2	40	23	76	42	64.06	43.53	36.47	64.1	182	161	192.33	185.667	373.667	458	429	416	5.4	30.4	8.4	9.3	5.22	5.45	5.74	5.41	8	4	5	0	0	0	0	0	17	3	1	1	1	2	0	1	0	0	0	9
222	female	61	1 2 3 4 5	120	2 3	70	36	18	79	28.87	32.07	44.2	30.6	191	174	198	206	433.33	443.1	424.67	609.667	15.1	15	5.5	17.7	5.15	5.23	5.8	5.13	2	4	2	0	1	1	0	0	10	3	1	3	0	1	0	1	0	0	0	9
223	female	24	1 2 3 4 5	2	1 3	110	93	0	77	47.3	34.73	52.47	60.07	172.3	84	168.33	181	334.67	445.67	537	474.67	21	20.2	24.3	26.2	5.24	5.74	4.96	5.3	3	4	7	0	3	1	7	3	28	3	1	3	0	1	0	1	0	0	0	9
224	male	26	1 2 3 4 5	24	1	12	8	289	18	16.47	52.47	25.87	44	164.75	61	183.33	218	364	649.667	500	522.33	21.6	25.2	0.7	23.2	12	2.3	4.95	1.2	2	2	2	0	0	1	0	1	8	1	1	1	1	1	0	1	0	0	0	6
225	female	55	1 2 3 4 5	24	1	76	37	18	84	51.33	25.87	20.87	51.43	209.33	210	202	242	444.667	411.33	526	567.25	9.6	30.7	10.2	9.2	5.27	5.69	4.74	5.83	2	0	0	0	0	0	0	0	2	1	1	1	3	1	0	1	0	0	0	8
226	female	23	2 3 5	8	2	105	94	13	123	48.8	20.87	19.97	37.97	229.67	198.33	188.83	246	389	482.67	351	502.33	7.2	17.1	6.3	11.7	5.17	5.37	4.88	5.13	4	5	10	7	6	6	3	0	41	3	1	1	1	2	0	2	0	0	0	10
227	female	30	1 2 3 4 5	96	2	49	38	94	50	45.43	79.97	19.33	39.2	190.33	150.33	170	199.67	429	589.67	382	439.33	8.6	17.2	10.2	13.1	5.08	5.41	4.46	5.63	6	10	6	3	10	0	0	0	35	3	1	1	1	2	0	3	0	0	0	11
228	male	53	1 2 3 5	7	2 3	11	5	40	16	75.97	44.37	52.3	78.37	106.2	66.33	225.5	156	424.67	518.67	517	496	7.4	1.2	11.4	4.6	5	5.38	5.5	5.38	3	3	1	0	1	3	0	0	11	3	1	3	3	1	0	1	0	0	0	12
229	female	50	1 2 3 4 5	36	1	7	38	70	8	61.87	62.26	21.23	41.03	166.7	51	245	321	397	493.67	255.67	580	6.2	6.6	8.8	5.3	5.09	5.38	5.59	5.27	4	2	2	3	2	4	0	1	18	3	1	1	3	1	0	1	0	0	0	10
230	female	21	1 2 3 4	72	1	6	3	110	22	21.3	26.57	48.97	34.07	208	111	160.33	261.67	516.33	721.6	430.33	523	9.9	8.1	4.3	11.5	5.22	5.14	5.54	5.4	1	1	5	0	1	3	0	0	11	3	1	0	0	1	0	1	0	0	0	6
231	female	14	1 2 3 4	96	1 3	114	76	12	67	50.03	28.2	37	62.53	146.667	107.667	206.67	178	426	426.33	400.33	420	6.2	2.8	4.7	10.8	5.55	5.57	5.15	5.55	5	5	2	3	2	2	2	5	26	3	1	3	0	2	0	2	0	0	0	11
232	female	45	1 2 3 5	2	1 3	24	18	76	23	47.43	43.73	50.57	59.33	167	150	276.33	186.33	402	454	481	538.67	33.7	28.5	5.4	34.4	5.09	5.15	4.82	4.7	10	2	6	0	0	3	0	0	21	3	1	3	3	1	0	1	0	0	0	12
233	female	41	1 2 3 4 5	60	2 3	57	66	105	45	61.9	56.6	38.83	64.23	208	134.33	231.83	198.33	331	410	392.33	480.67	3.8	6.3	2.3	4.6	5.36	6.55	5.44	5.58	10	2	2	0	0	4	0	0	18	3	1	3	1	1	0	1	0	0	0	10
234	female	30	1 2 3 5	15	2	56	37	49	81	54.57	42	30.13	64.77	118	79	207	185	394	472	459	566	6	40.2	2	9.9	5.32	5.7	4.73	5.55	0	7	7	0	5	5	0	1	25	0	1	1	2	0	0	0	0	0	0	4
235	female	28	1 2 3 5	36	2 3	182	47	187	37	59.23	34.47	24.1	67.9	152.33	126.67	225.67	163.33	411.67	474	394	541.67	5	5.4	2.9	13.8	5.95	5.79	5.7	5.94	0	8	2	0	6	6	0	0	22	2	1	3	3	0	0	0	0	0	0	9
236	female	37	1 2 3 5	60	2	51	52	44	51	40.67	20.2	42.67	58.03	166.67	140.33	160.33	201.33	383	467.67	511.33	485.67	128.8	22.8	26.2	14.1	5.36	5.65	5.74	5.16	0	7	8	0	7	7	0	0	29	3	1	0	3	0	0	0	0	0	0	7
237	female	46	2 3 4 5	12	1 3	28	18	80	50	42	14.3	19.87	23.63	191.33	180	212	226.33	368	466.3	496	520.67	9.8	35.6	2.9	20.8	5.8	6.05	5.39	5.59	0	9	2	1	8	8	0	0	28	3	1	3	3	0	0	1	0	0	0	11
238	female	25	1 2 3 4 5	276	1	126	135	83	220	43.67	31.97	46.6	36.47	184	142.67	213.66	231.33	467	585	567.67	583.33	21.7	25.2	6.2	22.7	4.96	7.52	5.92	5.54	1	1	3	0	2	9	0	0	16	2	1	1	0	1	0	1	0	0	0	6
239	female	39	2 3 4 5	216	1 3	79	15	52	83	45.33	42.9	46.73	44.2	156.33	114.33	182	192.33	446.67	453.67	389.67	445.67	4.3	35	3.7	15.4	4.95	5.32	4.66	5.15	1	1	9	0	1	10	0	0	22	3	1	3	3	1	0	1	0	0	0	12
240	female	29	1 2 3 5	24	2	79	23	62	86	46.37	7.34	29.27	45.4	232.5	227.66	191	319	425	507.33	364.67	473	19	3.6	3.8	18.3	4.74	4.98	4.96	4.82	5	4	10	3	4	3	3	0	32	3	1	1	0	1	0	1	0	0	0	7
241	female	25	1 2 3 5	12	1 3	188	173	76	105	66.2	27.57	11.83	47.77	120.67	108.67	213	190	565.67	570.67	427.33	459.67	8.4	14.5	2.4	13.1	4.88	5.22	5.13	5.44	0	1	1	4	1	3	0	0	10	3	1	3	3	1	0	0	0	0	0	11
242	female	15	1 2 3 4	20	2 3	65	3	18	59	64.43	68.73	51.27	61.13	164	124.67	164.75	194.33	397.33	496.67	589.67	454.67	4	2.2	13.8	3	4.46	4.63	4.59	4.73	0	10	2	5	2	4	0	0	23	3	1	1	0	0	0	0	0	0	0	5
243	female	21	1 2 3 4 5	18	2	82	38	0	152	64.37	64.27	23.8	63.03	199.33	187.33	209.33	241.67	421.6	438.67	518.67	569.33	12.5	15.1	3.2	7.6	5.5	5.33	5.48	5.7	1	10	5	6	9	5	0	0	36	3	1	1	3	0	0	0	0	0	0	8
244	female	23	1 2 3 4 5	96	2 3	46	51	289	64	46.7	43.37	39.2	52.87	206	135.33	229.67	181	526.33	566.67	493.67	546.67	10.7	16.8	1.4	15.6	5.19	5.6	4.98	5.74	1	1	1	3	2	3	1	1	13	0	1	3	0	1	0	1	0	0	0	6
245	female	32	1 2 3 5	60	1	0	0	18	17	35.75	38.1	38.37	39.8	151.67	115.33	190.33	158	424.33	441.67	701.33	529	4.2	16.2	11.3	19.2	5.21	5.62	5.23	5.39	10	2	3	3	3	2	2	3	28	3	1	0	1	1	0	1	0	0	0	7
246	female	40	2 3 4 5	300	1	72	48	13	61	62.73	52.5	41.03	74.77	172.33	67	202.67	174.33	432	459.67	420	487.33	7.3	1.3	4	12.3	5.75	5.92	5.46	5.92	5	7	4	7	2	3	0	2	30	1	1	2	3	2	0	2	0	0	0	11
247	female	26	1 2 3 4 5	6	1	29	23	94	32	61.53	65.93	17.63	67.67	185	241	296.67	212	355	486.67	538.67	522.67	7.6	9.1	11.5	10.1	5.18	4.8	5.27	4.66	1	10	6	8	10	6	0	0	41	3	1	2	3	1	0	0	0	0	0	10
248	female	24	1 2 3 4	72	2	133	157	40	84	64.93	50.58	16.47	62	262.67	217.67	218	314.33	561.67	556.33	492.67	472	9.7	8.2	6.7	9.6	4.67	5.4	5.34	4.96	5	5	1	9	1	1	0	0	22	3	1	0	2	2	0	1	0	0	0	9
249	female	25	2 3 4	6	2 3	72	3	70	71	55.5	52.67	51.33	59.33	135.33	156	242	197	354.33	396	566	186.33	6.7	6.6	3.2	9.6	4.87	5.14	5.85	5.13	10	2	2	3	2	3	0	0	22	3	1	3	3	1	0	1	0	0	0	12
250	female	54	2 3 4 5	24	2 3	101	77	110	152	62.63	53.16	48.8	52.3	155.67	125.33	211	212.33	379	488	541.67	440	4.3	3.3	6.6	5.6	4.72	4.71	4.8	4.59	3	5	3	4	2	7	2	0	26	3	1	3	3	1	0	1	0	0	0	12
251	female	25	1 2 3 4 5	24	2	71	36	12	54	57.07	53.77	45.43	61.23	244.33	209.67	207.667	226.67	445.33	473	485.67	500	11.3	3.4	7.7	11.9	5.41	4.17	4.94	7.21	10	1	7	5	5	8	0	0	36	0	1	1	0	0	0	0	0	0	0	2
252	female	25	2 3 4	360	1 3	53	67	76	84	51.57	59.73	25.97	48.97	210.5	196.67	225	284.33	438.75	471.33	273.33	549.33	4	5	6.2	4.6	4.57	4.88	4.65	4.98	3	3	2	1	2	1	1	0	13	3	1	1	1	1	0	1	0	0	0	8
253	female	19	1 2 3 4 5	24	2 3	0	3	105	19	46.43	39.53	21.87	37	145	155.67	234.33	174	544.67	444.9	426.33	437	11.5	6.2	5.3	2.5	4.68	4.99	5.46	5.23	0	10	2	6	2	9	0	0	29	3	1	3	0	1	0	1	0	0	0	9
254	female	20	1 2 3 4 5	72	2 3	53	31	49	36	59.87	53.63	21.3	50.57	205.67	173.67	279	214.33	430.33	394.67	454	473.33	6.7	4.6	6	9	5.41	5.92	5.31	5.46	3	10	3	7	3	3	0	0	29	3	1	3	0	1	0	1	0	0	0	9
255	female	39	2 3 4 5	180	1	149	128	126	70	46.6	52.83	50.03	38.83	206.33	204.33	205.6	209	400.33	410.33	410	518	3.2	7	1.9	9.7	4.78	5.24	4.49	5.08	3	5	2	8	1	3	0	0	22	3	1	0	3	2	0	1	0	0	0	10
256	female	34	2 3 4 5	156	2 3	92	154	79	92	46.73	24.55	23.63	30.13	207.33	100	219	301.67	481	655.75	472	511.33	6.6	15.5	7.6	12.7	4.69	4.89	5.87	4.98	10	3	8	3	5	4	0	0	33	3	1	1	3	1	0	1	0	0	0	10
257	female	38	1 2 3 4 5	24	2	10	5	79	45	59.27	35.53	36.47	74.1	134.67	106.67	215	186.67	392.33	373.67	474	496	12.7	2.2	2.8	10.7	4.7	4.49	5.78	4.5	4	2	7	6	5	2	0	0	26	3	1	1	2	2	0	1	0	0	0	10
258	female	20	2 3 5	60	1	44	43	0	66	61.83	45.47	44.2	42.67	280.33	336	255.3	413.67	459	575.67	467.67	567.67	11.6	2.6	1.8	15.3	4.27	4.88	4.86	4.79	10	5	6	8	3	8	0	0	40	3	1	1	3	2	0	2	0	0	0	12
259	female	34	1 3 4 5	24	2 3	157	70	63	43	51.27	52.27	17.3	47.4	138.67	113.67	246	172.67	394	325.67	437	389.67	5.3	5	11.7	5	4.83	4.86	5.54	5.27	0	10	9	1	1	3	0	0	24	0	1	3	3	0	0	0	0	0	0	7
260	female	27	2 3 4 5	36	1 3	10	3	12	6	23.8	31.67	5.2	49.87	164.67	173.67	188.33	211	301.33	386	498.67	364.67	4.3	7.7	4.3	4.8	5.23	2.16	5.45	5.34	9	5	5	1	4	1	7	1	33	2	1	3	2	2	0	2	0	0	0	12
261	female	49	1 2 3 5	36	2 3	98	52	105	77	61.57	62.75	16.43	52.7	186.33	162	163.33	191.33	511.7	416.67	353	427.33	1.5	3.3	2.7	4.6	5.7	5.9	4.99	5.85	6	2	1	8	1	1	0	0	19	3	1	3	3	2	0	1	0	0	0	13
262	female	25	1 2 3 5	120	2	67	48	48	74	55.7	71.23	34.2	79.57	259.33	337	280.33	221.67	438.33	543.67	580.67	553.67	6.2	6.1	8	10	5.05	4.92	5.06	4.8	4	5	4	8	3	3	2	5	34	2	1	2	0	1	0	1	0	0	0	7
263	female	30	1 2 3 5	120	2	121	82	133	168	65.97	69.43	11.73	62.13	190	145	166.67	192.67	443.33	446.33	469	597.33	5.3	6.2	5.6	8.7	4.78	5.5	5.78	5.94	9	5	5	10	5	3	0	0	37	3	1	1	3	2	0	2	0	0	0	12
264	female	34	1 2 3 5	12	2	50	26	50	40	52.97	52.67	3.8	50.37	294.67	255.33	298.5	301	564.67	531.67	582.33	693	6	8.3	6	10.8	4.82	4.85	4.62	4.65	9	10	2	8	7	8	0	0	44	3	1	1	2	2	0	0	0	0	0	9
265	female	22	1 2 3 4 5	24	1	94	66	0	78	56.13	31	47	61.7	245.33	222.33	260.4	235.67	436.33	509	294	556.67	11.9	14.4	7.3	12.4	5.28	5.42	5.17	5.46	0	10	10	8	5	9	0	0	42	3	1	1	1	0	0	0	0	0	0	6
266	male	23	1 2 3 4 5	6	1 3	34	40	81	136	34.2	52.07	18.7	49.57	147.33	138	201.07	197.33	359.33	462	526	520.67	7.6	30.3	11.7	8.7	5.39	5.36	5.46	5.31	3	1	3	0	9	10		1	27	0	1	3	2	1	0	1	0	0	0	8
267	female	26	1 2 3 4 5	48	1 3	33	56	62	42	58.03	50.23	30.03	45.03	191	166.33	183	188	404.33	442	408	572	5	2.6	4.9	19.2	4.36	4.79	4.62	2.9	10	1	2	0	10	3	0	2	28	3	1	3	3	1	0	1	0	0	0	12
268	female	48	1 2 3 4 5	60	2 3	91	69	83	59	36.2	59.9	22.77	63.27	253.67	251	262.33	304	473	552	625.67	550.33	7	27	7.2	10.1	5.59	5.78	5.35	5.87	0	10	10	0	5	4	0	0	29	0	0	0	2	0	0	0	0	0	0	2
269	female	40	2 3 4	72	1 3	168	30	65	81	63.3	70.53	21.3	52.3	196.33	131.33	232.67	207.75	542.2	565	449	455	5.4	6.8	5.1	4.1	4.63	4.86	4.26	4.73	0	7	2	0	2	5	0	0	16	0	1	3	2	0	0	2	0	0	0	8
270	female	45	2 3 4 5	12	2 3	188	72	48	246	39.97	52.9	13.37	46.07	187	187.33	205.33	219.67	333.66	431.33	563	515.33	2.3	2.8	1.7	6.8	5.4	5.7	5.18	5.02	0	7	10	0	5	6	0	0	28	0	0	3	0	0	0	0	0	0	0	3
271	male	51	1 2 3 4 5	96	1 3	61	11	135	55	50	33.73	45.8	56	185	184	279	290.3	358	333.3	505	514.3	7.5	2.8	7.9	4.6	4.64	4.82	4.6	4.76	6	5	6	5	1	7	1	0	31	2	1	3	3	1	0	1	0	0	0	11
272	female	46	1 2 3 4 5	60	1	168	30	65	81	25.13	56.93	44.17	57.3	241.33	226	201	317.67	479.67	560	497	625	4.9	5.8	5.3	3.9	4.96	5.4	5.26	5.17	0	8	1	0	7	8	0	0	24	1	1	1	3	0	0	0	0	0	0	6
273	female	25	2 3 4	10	2 3	105	71	221	44	50.47	72.27	36.97	63.83	224	197.33	267	292.5	465.33	455.67	530.33	449	3.3	7.3	6.3	4.6	4.59	4.84	4.59	2.49	3	8	10	0	8	9	0	0	38	3	1	3	3	0	0	0	0	0	0	10
274	female	28	2 3 4 5	72	1	1	0	25	3	71.9	61.13	5.83	65.43	120.3	110	203.67	188.33	245.33	257	412	409.33	3.9	11.9	1.7	7.9	5.68	6.55	5.11	5.2	0	9	10	0	9	10	0	0	38	1	1	0	1	0	0	0	0	0	0	3
275	female	35	1 2 3 4 5	12	2 3	13	37	84	55	63.3	70.53	21.3	52.3	175.67	224.33	259	258.67	280.33	334	343.67	514	2.5	4.9	6.5	2.6	4.89	5.11	4.49	4.82	10	2	1	0	10	3	0	0	26	0	1	3	3	0	0	0	0	0	0	7
276	female	41	1 2 3 5	42	2	63	40	85	24	69.43	57.47	42.13	78.27	196.67	166.67	216.33	214	452.67	453	449	355	5.4	6.8	5.1	4.1	4.8	4.33	4.52	4.54	1	8	4	0	4	3	0	0	20	1	1	0	3	2	0	2	0	0	0	9
277	female	24	2 3 5	24	2 3	58	25	73	140	64.3	79.5	71.43	80.63	208	179	264	231.33	386.67	334.33	472	546.67	7.5	2	2.9	11.2	4.63	4.86	4.26	4.73	0	6	1	0	5	4	0	0	16	1	1	3	3	0	0	0	0	0	0	8
278	female	19	1 2 3 5	18	2	61	4	88	57	57.7	25.77	28.53	46.37	196.33	131.33	232.67	207.75	419	323.67	332	443.5	4	16	6.7	8.3	4.9	5.09	5.33	5.49	0	7	10	0	5	8	0	0	30	3	1	2	3	0	0	0	0	0	0	9
279	female	25	1 2 3 4 5	12	1 3	9	16	66	70	35.3	74.99	37.97	69.67	151	134.33	161	293.33	512.667	498.67	502.33	547	1.4	4.4	5	5.3	5.13	5.16	5.42	5.17	0	3	5	0	2	7	0	0	17	3	1	3	3	0	0	1	0	0	0	11
280	female	23	2 3 4 5	12	1 3	17	32	80	24	56.47	70.27	22.23	67.2	199.67	160.67	227.67	217	344	353.33	414	454.33	2.4	3.8	2.6	4.5	4.92	4.91	4.9	4.92	10	8	2	0	1	6	0	1	28	3	1	3	3	0	0	0	0	0	0	10
281	female	46	1 2 3 4 5	12	1 3	68	31	110	116	58.93	54.8	40.17	36.4	205.33	156.67	218.33	224.67	416.67	357	359.33	533	3.4	1.6	3.8	13.6	4.87	3.33	5.02	5.21	9	5	2	0	5	5	2	0	28	3	1	3	3	0	0	1	0	0	0	11
282	female	40	1 2 3 4 5	24	2	62	18	45	62	37.8	33.17	6.7	45.57	143	115.67	159.67	159	345.67	409	336.3	430	6.9	4.1	5.2	2.9	5.56	5.36	5.33	5.09	10	9	2	0	7	3	0	2	33	2	1	1	0	0	0	0	0	0	0	4
283	female	46	1 2 3 4 5	48	1 3	44	8	14	55	62.9	51.43	33.63	72.67	166.33	199.67	208	298.5	462.33	650.33	474	602.5	6	2.4	1.5	6.3	4.37	5.62	5.38	5.61	9	1	2	1	8	3	0	0	24	3	1	3	3	0	0	1	0	0	0	11
284	female	37	1 2 3 4 5	6	1	16	12	32	18	48.13	47.93	26.4	52.4	180.33	178	281.5	230	442.33	507.33	560.2	391.67	16.1	20	7.2	10.9	5.59	7.8	4.86	4.81	3	2	1	0	2	8	0	0	16	3	1	1	3	1	0	1	0	0	0	10
285	female	27	1 2 3 4 5	60	1 3	150	70	267	94	62.1	58.43	53.2	66.53	164.67	134	199	230	616.67	532.33	586.33	523.33	8.5	2.2	8.1	15.1	5.12	5.3	4.83	4.64	3	6	5	3	5	4	4	3	33	3	1	3	3	0	0	1	0	0	0	11
286	female	31	1 2 3 4 5	6	2 3	18	26	37	52	28.63	76.43	43.73	59.17	144.33	126.5	177.33	173	321	248	493	418.33	5.7	7	6.6	5.1	5.22	6.51	5.38	5.37	7	5	1	0	9	5	1	0	28	3	1	0	2	2	0	1	0	0	0	9
287	male	21	2 3 4 5	24	2 3	129	72	175	279	56.68	56.82	60.63	40.63	268	204.67	269.33	262	425.67	392	346.33	514	0.2	5.7	10.8	5.8	5.72	6.03	5.55	5.78	1	6	2	1	10	4	1	0	25	3	1	3	0	1	0	0	0	0	0	8
288	female	24	1 2 3 4 5	60	1 3	47	13	61	51	45.07	59.43	45.25	50.32	199	176	218	185.33	373.67	348	380	411	7.3	8.5	11.7	9.3	4.87	5.77	5.78	5.99	0	3	1	0	1	4	0	0	9	2	1	3	1	1	0	1	0	0	0	9
289	female	23	2 3 4	36	2 3	72	35	152	114	55.7	71.23	34.2	79.57	188	174.67	231	232	460.67	365	231	232	7.8	2.2	7.2	5.6	4.9	6.05	6.1	6.23	0	6	6	8	5	8	0	0	33	0	1	3	2	0	0	2	0	0	0	8
290	male	15	1 2 3 5	48	2	72	6	91	74	56	35	43.32	58.31	187	163.67	217.5	215	413.5	328.67	320.5	433.67	10.3	7.4	1.7	8.4	4.95	5.05	4.85	5.17	1	3	3	1	5	9	0	0	22	1	1	1	0	1	1	1	0	0	0	6
291	male	13	2 3 4	48	2 3	84	71	63	68.5	53.9	83.5	41.35	60.9	193.33	194	201.2	271	429.33	284	504.8	450.67	2.8	3.1	7.4	5.5	5.41	5.5	5.19	5.64	4	2	2	0	5	10	2	5	30	0	0	2	0	1	0	1	0	0	0	4
292	female	27	2 3 5	60	1	55	36	100	68	65.7	54.1	40.7	73.5	182.33	115.33	209	161.67	455.67	325	419.67	474.67	4.4	4.7	3.8	8.6	5.76	5.87	5.59	5.69	2	6	2	0	9	3	3	0	25	3	1	0	3	0	0	0	0	0	0	7
293	male	56	1 2 3 4 5	96	2 3	188	129	253	138	26.2	44	34.3	40.7	223	209.5	186.33	209	449.5	412	470.33	621.67	9.3	7.2	4.5	8.3	6.07	5.79	5.9	5.6	0	7	3	0	9	3	2	0	24	0	1	0	3	0	0	0	0	0	0	4
294	female	16	1 2 3 4 5	24	1	80	69	96	51	60.9	61.8	38.7	63.2	186.5	136.5	206	218.33	410.5	350.5	351.67	420.67	5.9	7.2	7.3	6.6	5.83	5.97	4.91	4.78	0	8	6	0	9	6	4	0	33	2	1	1	0	0	0	0	0	0	0	4
295	female	16	1 2 3 4 5	12	1 3	62	86	67	126	53.3	61.06	54.2	60.87	169.67	139.33	198.67	148.33	272	269.67	328.33	465.33	4.8	3.1	5	4.6	5.12	5.04	5.23	5.43	0	1	1	0	1	7	2	0	12	3	1	3	0	0	0	0	0	0	0	7
296	female	18	2 3 4	8	2 3	70	66	89	43	54.23	61.67	21.5	67.9	209.33	127.5	222	212.67	344.33	428.75	395.33	455.67	4.6	3.7	1.3	3.5	4.99	5.6	5.43	5.55	1	9	1	0	5	5	5	1	27	3	1	3	3	1	0	1	0	0	0	12
297	female	36	1 2 3 4 5	96	1	52	21	21	0	57.4	77.5	52.6	55.5	168	344	227.5	252	604	466	432	755	10	7	5.3	12.2	6.01	6.17	5.91	6.03	0	6	7	0	7	8	2	0	30	3	1	0	2	0	0	0	0	0	0	6
298	male	66	2 3 4 5	7	2 3	58	42	55	128	58.17	74.5	52.8	67.3	190.67	176	216.2	200	357	457	539	498.5	15.8	2.4	7.2	13.9	4.78	4.93	4.76	4.62	9	5	3	0	9	2	3	3	34	0	2	3	3	2	0	2	0	0	0	12
299	female	38	1 2 3 4 5	24	1 3	80	37	53	48	42.6	62.77	46	74.97	179.33	140.67	249.5	192	370.33	436.67	406	511	2.5	1.5	6	2.9	4.43	4.63	4.71	4.59	2	8	2	1	8	3	2	1	27	3	1	3	1	1	0	0	0	0	0	9
300	female	46	1 2 3 4 5	144	2	143	96	138	190	50.8	55.9	55.17	41.33	210.67	147.33	227	202.33	481	450.33	507.67	507.33	1.9	5.2	6.8	4.1	4.5	5.88	5.4	5.73	0	9	8	0	5	3	6	0	31	0	1	0	3	0	0	0	0	0	0	4
301	female	38	1 2 3 4 5	36	1	79	59	183	84	70.83	65.8	27.07	56.5	149.33	128.33	217	203.33	458	404.67	458	459	6.5	3.3	4.3	4.5	5.69	5.33	4.56	5.09	1	3	9	0	3	10	3	0	29	3	2	1	1	1	0	1	0	0	0	9
302	female	32	1 2 3 4	48	2 3	85	29	65	48	68.63	64.67	50.2	67.63	199.33	144.67	215	227.67	483.33	367	447	403.67	2.2	2.1	1.9	4.2	4.87	5.83	5.88	5.84	0	7	5	0	7	0	2	0	21	3	1	3	3	0	0	0	0	0	0	10
303	female	24	2 3 4 5	24	2 3	128	53	62	64	66.37	70.5	36.4	67.43	165.67	123	189	196	357	516.33	372	431.33	0.7	1.8	0.7	5.7	5.49	5.4	4.85	4.92	0	8	6	1	9	0	4	0	28	2	1	3	0	0	0	0	0	0	0	6
304	female	47	2 3 4 5	12	1	0	35	57	209	65.9	40.9	23.4	45.7	148.67	166.33	168.67	211	280.67	440	401.33	546.67	0.7	7.2	5.4	7.1	5.44	5.68	5.63	5.32	2	9	7	0	8	0	2	0	28	3	1	1	3	1	0	0	0	0	0	9
305	female	38	1 2 3 4 5	60	2 3	73	81	60	76	65.53	70.8	32.33	73.1	218.33	238	204	204.33	482.67	593	396	159.33	2.4	6.3	5.4	4.3	5.83	5.82	5.52	5.7	0	7	2	0	10	2	7	0	28	1	2	3	0	0	0	0	0	0	0	6
306	female	21	1 2 3 4 5	24	2 3	42	57	35	45	66.33	69.95	26.03	48.4	119	161	233	100	644	440.67	483.67	763.33	3.9	2.9	3.6	10.8	4.69	3.23	4.95	5.07	1	1	4	0	1	0	4	0	11	3	1	3	0	1	0	1	0	0	0	9
307	female	36	1 2 3 4 5	60	1 3	182	209	161	75	68.77	47.6	51.13	71.8	174.67	172.67	177.33	213.33	446	390.67	379.33	468	2.3	2.3	4.2	0.9	5.26	5.39	5.22	5.42	2	6	2	0	5	0	2	0	17	0	1	3	3	1	0	1	0	0	0	9
308	female	42	1 2 3 5	60	1	91	71	124	64	67	67.8	42.53	69.37	173	148.67	206.33	195.33	365.33	369.67	414.33	380.33	1.3	6.2	4.3	1.7	4.72	5.04	4.9	4.9	9	5	2	0	5	0	9	0	30	3	1	1	2	1	0	1	0	0	0	9
309	female	19	2 3 4	24	1 3	122	55	69	54	57	69.7	32.47	68.83	212.67	164.33	219	211.67	364.67	261.67	364	456.33	2.3	4.5	2.1	3.9	5.33	5.41	5.03	5.21	0	1	1	1	2	0	1	0	6	3	1	3	1	0	0	1	0	0	0	9
310	female	28	1 2 3 4	36	1	77	99	50	150	34.17	26.93	37.23	43.43	260	324	289	297	469.67	501.33	543.67	563.67	2.3	4.6	5.2	3.7	4.93	5.35	5.32	5.5	0	8	8	3	5	0	2	0	26	0	1	1	2	0	0	0	0	0	0	4
311	female	29	1 2 3 5	72	1 3	68	63	54	71	47.8	50.53	50.13	50.6	156.67	130.33	203	163.33	359.33	520.33	392.33	469.33	1.7	11.7	1.3	10.1	4.4	5.85	5.88	5.85	4	4	4	1	4	0	2	0	19	3	1	3	1	2	0	2	0	0	0	12
312	female	22	1 2 3 5	24	1 3	65	18	78	87	56.67	70.57	29.9	71.8	161	140.33	231.67	198.33	332	297.33	452.33	622	2.9	1.9	4.8	2.6	5.65	5.65	5.38	5.53	1	1	1	0	1	0	2	0	6	3	1	3	1	1	0	1	0	0	0	10
313	female	25	2 3 4 5	60	2 3	82	33	110	57	78.8	63.23	36.33	73.47	157	136	226	175	312	514.67	416	493.67	4.4	7	6.1	1.7	4.63	5.69	6	5.87	0	4	1	0	3	0	9	0	17	3	1	3	1	1	0	1	0	0	0	10
314	female	22	1 2 3 5	60	2	79	18	162	94	46.7	39.84	26.77	61.67	172.33	162	224.67	213.33	505	374	463.67	535.67	11.1	6.2	17.7	3.5	4.8	5.57	5.48	5.47	1	1	9	0	2	0	2	0	15	0	1	2	0	1	0	1	0	0	0	5
315	female	48	1 2 3 5	60	1	136	22	139	60	34.33	39.23	49.9	51.37	214	126.33	242	204.33	306	292.33	350	448.67	1.9	6.6	1.7	6	5.76	5.8	5.6	5.74	1	1	3	0	1	0	20	1	27	3	1	1	3	1	0	1	0	0	0	10
316	male	17	1 2 3 4 5	240	2 3	55	86	59	131	20.03	31.1	34.17	35.77	306	300.667	198.33	311.667	558.667	545.667	286	501.333	13.6	17.7	6.4	10.3	5.47	5.59	5.87	5.49	0	9	9	1	7	0	2	0	28	0	0	3	0	0	0	0	0	0	0	3
317	female	18	2 3 4	24	1 3	20	7	47	79	56.2	29.2	47.8	57.2	176	107.33	219.33	229.75	299	451.667	443.67	455	4.6	3.1	10.6	5	5.15	5.95	5.49	5.43	2	7	8	3	9	1	0	0	30	3	1	3	3	1	0	0	0	0	0	11
318	female	54	1 2 3 4	180	1	74	59	56	116	55.1	53.3	56.67	55.9	177.33	145	199.33	172	505	523.5	307.67	519	12.3	21.9	6.5	9.3	4.9	4.92	5.44	4.92	2	2	7	0	2	0	2	0	15	1	1	0	3	1	0	1	0	0	0	7
319	female	48	1 2 3 4	6	2 3	38	62	42	91	55.53	54.23	18.8	50.5	182	119	165.67	303	506	507.33	472	411.67	6.1	4.3	5.5	13.9	5.48	5.29	5.83	5.06	1	1	1	0	5	0	0	0	8	1	2	3	1	1	0	1	0	0	0	9
320	female	39	2 3 5	6	1	16	45	69	28	60	58.07	46.7	54.6	125	76	215.67	121.67	533	409	339.3	252	5.5	6.4	7.5	10.5	4.54	4.84	4.69	4.97	1	1	1	0	1	0	1	0	5	3	1	2	3	1	0	1	0	0	0	11
321	female	31	2 3 5	8	2	53	16	145	45	58.93	43.73	11.8	55.77	196.67	145.67	218.33	226.33	210.67	396.33	390.67	564.67	13.2	17.2	4.1	16.8	4.86	4.29	5.26	4.98	7	4	4	0	3	1	2	0	21	1	1	2	3	2	0	2	0	0	0	11
322	female	18	1 2 3 5	6	2 3	34	9	110	27	40.03	34.83	39.37	29.67	210	203.67	219	196.67	369.33	500.67	369.67	482.33	15.3	25	3.2	22	4.78	5.36	4.72	5.86	1	9	1	0	10	0	0	0	21	3	1	3	3	1	0	1	0	0	0	12
323	female	27	1 2 3 4 5	96	1	52	11	42	7	59.53	55.43	18.83	56.6	131.67	131.67	222	185	359.67	503	261.67	509	4.7	4.6	5	8.1	4.61	4.62	5.33	4.58	7	7	5	5	5	0	0	0	29	3	3	3	3	2	0	2	0	0	0	16
324	female	18	1 2 3 4 5	6	1 3	0	4	159	0	24.57	34.34	43.43	27.53	179.33	152.33	181	211.33	477.33	499	469.33	528.67	21.5	27.2	10.7	30.8	5.55	5.35	4.93	5.74	2	4	3	1	4	1	2	1	18	3	1	3	0	2	0	2	0	0	0	11
325	female	35	1 2 3 4 5	144	1	92	28	144	102	51.93	57.23	50.6	35.57	283.75	196	215.33	305.33	500	464	622	602.33	7.8	0.4	3.2	8.1	5.33	5.78	5.29	5.76	9	5	2	0	6	1	0	0	23	3	1	2	1	2	2	0	0	0	0	11
326	female	41	1 2 3 4 5	42	1	159	37	47	171	49.03	50.67	28.23	49.7	173	154.33	254	228	454	480	493.67	552	11.6	9.2	0.9	9.1	5.31	5.84	4.16	5.86	6	6	4	3	9	0	2	5	35	1	3	3	0	2	1	2	0	0	0	12
327	female	37	1 2 3 4 5	156	2	47	11	182	20	44.67	57.03	11.53	65.3	150.33	131.67	230.33	199.67	304	414.33	535.67	331.67	5.2	6.9	7	9.1	5.41	5.64	5.43	5.03	6	6	2	0	3	5	1	1	24	3	3	3	1	3	0	3	0	0	0	16
328	female	19	1 2 3 5	12	1	56	33	91	23	51.63	49.4	45.8	52.97	165.33	134	220.33	179.33	378	344	446	435.67	6.3	42.2	7.1	16.2	5.17	6.56	5.16	5.49	1	1	1	0	1	1	1	1	7	3	1	2	2	0	0	0	0	0	0	8
329	female	26	2 3 4	156	1 3	42	11	82	32	55.63	47.93	57.27	58.4	169	173	236	232.5	362.33	453.33	365.33	509.5	6.8	3.4	16.1	9.4	5.44	5.74	5.4	6	4	2	4	4	8	0	4	4	30	3	1	3	0	2	1	0	0	0	0	10
330	female	18	1 2 3 5	12	1	69	72	77	102	48.67	48.37	20.17	67.36	98.8	81.67	208	192.67	361.2	357.33	364.67	412	8.4	8.1	1.6	10.4	5.29	5.44	5.33	5.42	2	1	0	0	2	2	0	0	7	3	1	1	0	1	0	1	0	0	0	7
331	female	34	1 2 3 5	12	1 3	145	46	68	43	70.63	75.6	43.43	90.4	217.67	184.67	203.67	277.33	393.63	442	469.67	526	8.7	6.9	1.4	6.9	4.16	4.14	5.33	1.35	5	5	8	0	5	5	0	0	28	3	1	3	3	2	0	2	0	0	0	14
332	female	47	1 2 3 4 5	24	2 3	94	28	65	62	40.6	48.2	1.8	60.67	217.33	178.67	197	205.67	481.67	510	381.67	501	5.3	41.2	3.7	6.6	5.43	5.59	4.17	5.46	7	7	4	3	2	2	2	0	27	3	1	3	3	2	0	2	0	0	0	14
333	male	44	1 2 3 4 5	24	2	94	89	93	81	54	32	18.7	65.2	173	119	173	246	362	354	412	527	13.8	19.8	6.4	23.5	5.16	5.81	5.9	5.7	4	4	0	0	2	0	0	0	10	3	1	0	3	2	0	2	0	0	0	11
334	female	30	1 2 3 4	12	1 3	54	58	85	75	32	25.8	26	40	160	158	196	228	286	358	478	438	5.5	6.9	10.8	14.9	5.4	5.62	5.33	5.17	2	1	4	0	1	0	1	0	9	3	1	3	3	1	0	0	0	0	0	11
335	female	51	1 2 3 4 5	156	1	96	119	159	90	68.23	31.27	13.07	73.6	164.33	148	163.67	152.33	443.67	382	460.33	233.33	3.6	3.9	2.4	6.6	5.33	5.39	5.59	5.47	5	6	5	0	9	2	3	0	30	1	1	2	3	2	0	0	0	0	0	9
336	male	32	1 2 3 5	48	1	20	1	99	92	61.53	80.2	20.8	71.7	149	168.67	197.33	181	307.67	404.33	541.33	430	4.9	4.4	3.6	7.3	5.2	5.6	5.78	5.52	0	8	2	0	5	0	0	2	17	3	1	1	0	0	0	0	0	0	0	5
337	female	46	2 3 4	72	1 3	232	85	175	87	45.8	69.87	24.5	70.4	195.33	180.66	279	254.33	472	417.67	598.67	513.67	8.5	17.4	11.1	9.2	5.31	5.25	5.53	5.28	5	5	5	0	5	0	0	0	20	3	1	1	1	2	0	2	0	0	0	10
338	female	20	1 2 3 4 5	6	1	54	79	19	122	57.27	36.83	36.57	67.17	215	219.67	211.5	236	339.3	314.67	363.2	679	2.7	3.9	6	2	5.38	5.55	5.73	5.6	0	5	2	0	9	0	0	0	16	3	1	1	0	0	0	2	0	0	0	7
339	female	22	2 3 4 5	6	1	12	6	20	56	80.17	80.27	55.2	83.03	149.3	146	190	184.33	311.67	405.33	411.67	401.1	10.6	44.6	21	15.3	4.42	4.59	4.58	2.39	7	6	0	1	10	0	0	0	24	3	1	0	0	0	0	0	0	0	0	4
340	female	49	1 2 3 5	96	1 3	69	16	25	39	70.23	69.7	30.63	61.17	170.33	133	180	232	423.33	527	417	473.67	6.5	24.9	11.7	11.7	4.96	5.33	5.38	5.45	7	8	0	0	9	0	0	0	24	3	1	3	1	0	0	0	0	0	0	8
341	female	35	1 2 3 4 5	24	2 3	121	70	161	95	65.13	61.7	52.77	59.77	202	148	244.67	188	434	391.67	412.67	453	5.5	6.3	4.3	6.6	5.31	4.38	4.95	5.09	2	2	0	0	1	0	0	0	5	3	1	3	0	1	0	1	0	0	0	9
342	female	26	2 3 5	24	1	72	117	95	51	40.43	53.37	12.7	46.2	223.67	126.67	213	187	464.33	445	497	416.33	17.5	4.5	3.9	7.4	5.15	5.32	5.13	5.38	5	8	7	3	5	5	4	2	39	1	1	0	0	2	0	3	0	0	0	7
343	female	42	1 2 3 5	48	1	5	0	7	20	55.83	78.13	18.77	64.07	168.33	142.67	200.33	205	369	404.33	419	513	4.1	4.1	4.8	17	4.43	5.12	4.5	4.54	7	6	1	0	9	0	0	0	23	3	1	1	3	0	0	0	0	0	0	8
344	female	32	2 3 5	6	2 3	94	70	40	58	31.3	52.53	40.8	52.59	239.33	220.67	205.67	296	458.67	484.33	577	542.3	10.2	4.3	5.6	7.1	5.18	5.33	4.96	5	7	1	3	0	8	0	0	0	19	2	1	3	0	0	0	1	0	0	0	7
345	female	42	1 2 3 5	240	2	35	12	50	42	52.33	60.53	42.33	53.73	163.5	136	223.67	159.33	238.75	335	407.67	407.33	5	8	4	6.1	4.6	5.9	4.65	5.82	7	8	0	0	7	0	0	0	22	3	1	1	2	0	0	0	0	0	0	7
346	female	29	1 2 3 4 5	24	2 3	46	51	43	64	46.7	43.37	16	52.87	206	135.33	264.4	181	526.33	566.67	503.33	564.67	10.7	16.8	7.7	15.6	5.19	5.6	8.4	5.74	3	2	3	3	6	0	0	1	18	3	2	3	0	2	0	2	0	0	0	12
347	female	23	1 2 3 4 5	24	2 3	93	16	152	115	38.67	66.47	31.92	66.03	136.33	102	200	148	401.33	365.33	379	486.5	3.2	6.8	3.1	1.4	5.17	5.05	4.8	4.98	7	2	5	0	5	0	0	0	19	3	1	3	1	1	0	2	0	0	0	11
348	female	24	1 2 3 4 5	6	2	143	13	31	126	44.3	60.5	42.37	65.67	194.67	82	216.67	173.67	397.67	440	405.67	467.33	9	19	5.6	9.2	5.04	5.09	5.23	4.88	5	5	0	4	4	0	0	0	18	3	1	0	3	1	0	0	0	0	0	8
349	female	25	1 2 3 4 5	72	1	121	20	40	43	40.18	52.4	45.52	56.38	153	177.33	217	204.33	414	389.67	496.67	504.67	4.1	6.3	5.3	6.4	5.6	5.73	5.51	5.19	7	6	6	1	1	6	1	2	30	3	1	1	1	3	0	1	0	0	0	10
350	female	39	1 2 3 4	240	1	13	1	24	46	49.5	45	46	46.4	130	118	236	191	225.7	321	447	469.33	4.4	7.9	4.9	14.6	5.2	5.14	5.76	5.43	7	1	1	0	5	0	0	0	14	3	2	2	2	0	0	1	0	0	0	10
351	female	24	2 3 5	96	1	65	41	57	53	46.7	31	44	55.9	226	201.67	242.5	223.5	329	563.67	482	526.5	9.3	21.9	4.8	6.3	5.45	5.75	5.12	5.14	7	6	0	0	5	0	0	0	18	3	1	2	3	0	0	3	0	0	0	12
352	female	42	1 2 3 5	60	1	196	206	234	221	58.87	27.43	57.8	52.17	203.67	154	214.33	213.67	513.67	351.5	466	518	4.7	7.4	1.7	7.3	5.48	5.72	4	5.88	2	2	2	0	5	0	2	0	13	3	1	0	3	1	0	1	0	0	0	9
353	male	27	1 2 3 4	72	1 3	172	68	213	136	44.37	27.57	25.93	48.2	165	135.33	218	221.33	449.33	425	501.33	466	6.3	8.4	6.5	6.4	4.89	4.99	4.56	5	7	9	1	4	5	0	0	4	30	3	2	3	1	0	0	0	0	0	0	9
354	female	24	2 3 4	96	1 3	42	55	209	47	19.77	16.33	66	29.67	250	215.33	202	324	364.33	496	464.33	389.67	14.5	27.2	6.7	29.3	4.76	5.72	5.31	5.56	5	1	4	0	5	0	4	0	19	3	1	3	3	2	1	0	0	0	0	13
355	female	50	2 3 5	8	2	50	29	55	98	43.8	35	49.57	49.2	153.33	114.67	223.67	219.33	382.33	414.67	369	434.33	5.8	6.9	6.4	5.6	5	5.13	5.15	5.28	7	6	0	0	10	0	0	0	23	0	1	0	3	0	0	0	0	0	0	4
356	female	25	2 3 4	48	1	41	44	138	65	38.07	31.57	61.57	49.43	299.1	202.67	168.33	291.33	425.33	526	458.67	572.67	9.6	1	7.8	12.8	4.32	4.55	4.43	4.62	2	3	7	0	9	0	0	0	21	3	1	1	0	1	0	1	0	0	0	7
357	female	32	1 2 3 4	96	2 3	8	6	227	13	31.57	50.9	37.7	47.1	139.67	99	239.33	157	321.33	364	318.75	468.3	6.1	5.4	7.1	5.6	5.78	5.22	5.18	5.6	7	2	0	0	9	0	0	0	18	3	1	3	1	0	0	0	0	0	0	8
358	female	41	1 2 3 4 5	6	2 3	128	94	138	83	39.3	56.93	61.7	48.87	190.67	157	163.5	239.33	470	530.33	526.33	432.33	4.4	7.2	0.8	7.2	5.29	5.59	5.6	5.84	1	3	3	0	3	0	6	6	22	3	1	3	0	1	1	0	0	0	0	9
359	female	26	1 2 3 4	24	2 3	75	39	75	60	58.27	49.97	53.37	72.6	103	148	206	226.33	423.67	472.67	401.33	502.33	2.9	5.1	7.9	2.4	5.02	4.87	3.19	4.84	3	8	6	6	3	3	3	2	34	0	1	3	3	2	0	0	0	0	0	9
360	female	23	1 2 3 4 5	48	2	109	37	74	71	39.47	53.57	38.13	35.5	221.67	172.33	272	186.33	522.67	442	416.33	601	4.8	3.8	11.6	9.1	5.28	7.55	4.17	5.73	4	6	1	0	8	0	2	0	21	3	1	1	3	1	0	0	0	0	0	9
361	female	27	1 2 3 4 5	72	2	89	64	116	75	64.1	67.6	52.53	75.1	253.33	211	259.33	208.33	481	473.67	513	585.33	9	41	5.5	10	5.48	5.87	5.04	5.64	1	3	7	0	1	0	3	0	15	3	1	1	3	1	0	1	0	0	0	10
362	female	25	1 2 3 4 5	12	2 3	150	58	65	131	47.8	51.5	26.03	52.37	217.67	188.67	232	221.33	414.33	368	542.3	509	7.8	5.4	16	9.2	5.43	4.99	5.6	5.03	7	8	0	0	10	0	0	0	25	3	1	3	1	0	0	0	0	0	0	8
363	female	22	1 2 3 4 5	24	2 3	68	33	196	71	47.75	51.43	25.67	45.37	155.33	115.67	171.67	208.37	374.33	456.33	389.67	636	2.4	3.6	3.9	5.7	4.77	5.3	5.2	5.09	2	6	2	3	8	2	5	2	30	3	1	3	3	1	0	0	0	0	0	11
364	female	20	2 3 5	48	2 3	94	68	172	82	61.43	34.83	64.1	54.83	213.66	164	206	238	443	539	517	520	9.4	19.33	4	8	4.88	1.3	5.12	5.35	2	2	2	1	1	2	1	0	11	3	1	3	0	1	0	1	0	0	0	9
365	female	20	1 2 3 4	48	2 3	68	69	112	68	36.53	43.63	13.4	58.57	228	190.67	271.67	290.67	357	356.67	555	470	8.6	7	4.5	5.5	5.28	4.95	5.15	5.15	7	9	0	0	5	0	0	0	21	3	1	1	1	0	0	0	0	0	0	6
366	female	32	2 3 4 5	48	2 3	88	45	152	52	41.2	51.13	42.37	66.47	339.33	315.67	282.33	393.67	511.67	544.67	631	560.67	2.1	4.7	4.6	10.9	5.25	5.31	5.32	5.32	7	6	0	0	10	0	0	0	23	3	1	3	1	0	0	0	0	0	0	8
367	female	39	1 2 4 5	48	2	23	23	22	183	34.67	75.63	41.6	74.03	199.67	220.67	239.5	272	421.33	371.67	379	566.33	1.5	2.2	5.9	3.8	5.72	5.5	5.3	5.33	7	8	0	0	9	0	0	0	24	1	3	3	1	0	0	0	0	0	0	8
368	female	35	1 2 3 5	48	2 3	116	34	70	100	64.63	73.6	54.7	70.33	190.67	183	198	259.33	386	384.5	463.37	583	5.7	7.6	11.5	8.5	5.16	3.26	4.53	4.87	5	8	8	0	8	8	8	0	45	2	1	3	3	3	0	3	0	0	0	15
369	female	49	1 2 3 4	60	1 3	65	3	192	62	33.37	62.33	43.6	66	174.33	150.33	209	232	404	410.33	429	407	9.2	1.3	6.8	5.7	5.81	5.7	5.32	5.5	3	3	3	0	9	0	0	0	18	3	2	3	3	2	0	2	0	0	0	15
370	female	36	1 2 3 4 5	60	2	209	87	185	254	61.27	71.7	37.7	49.57	181	149	216.7	171.67	464.67	425	396.67	440.67	2.5	1	1	3.6	5.28	4.34	5.12	5.33	7	9	1	0	8	0	1	0	26	2	1	0	2	0	0	0	0	0	0	5
371	female	19	1 2 3 5	60	2 3	55	26	58	61	61.4	70.93	24.07	61.57	185	162	244	246.33	365	258.3	445	356	4.4	7.5	4.8	5.7	5.41	5.24	5.18	5.23	7	1	2	0	0	0	0	0	10	2	1	3	0	0	0	1	0	0	0	7
372	female	28	1 2 3 4 5	72	2 3	138	173	210	149	49.03	29.23	47.53	57.7	196.33	214	165.33	181	427.67	416.67	463.67	638.67	5.5	7.1	1.1	11	5.43	5.74	5.63	5.83	9	6	1	0	5	0	0	1	22	3	1	1	0	1	0	0	0	0	0	6
373	female	46	1 2 3 4 5	60	2	227	180	197	190	47.93	50.97	45.67	57.77	261.67	230	273	268.33	457.33	494	622.8	502.33	2.1	3.3	1	3.5	5.39	5.05	5.13	5.23	9	6	0	0	7	0	0	0	22	3	1	1	3	1	0	0	0	0	0	9
374	female	15	2 3 4 5	12	2 3	138	53	178	90	61.47	48.33	55.87	59.77	211.67	187.33	293.1	170.33	517	496	610.1	619	10.3	4.7	7.6	7.5	5.77	5.49	5.75	5.72	6	3	0	0	5	0	0	0	14	3	1	3	3	2	0	1	0	0	0	13
375	female	37	1 2 3 4 5	48	1	75	85	86	63	36.3	35	41.17	49.93	205.67	188.33	213.8	279.33	502.67	546.33	538.33	594.33	6.3	8.9	16.4	5.8	5.04	4.36	4.65	5.48	9	5	0	0	5	0	0	0	19	2	1	1	2	0	0	0	0	0	0	6
376	female	34	1 2 3 4 5	120	2 3	74	37	100	44	61.3	64.97	21.23	53.73	200	125.33	229.33	182.67	478	514.33	532	444	7	8.3	4.4	6.2	5.21	4.97	4.83	5.03	9	2	5	0	9	0	0	0	25	3	1	3	3	1	0	1	0	0	0	12
377	female	21	1 2 3 4 5	24	2 3	116	69	209	156	53.2	49.83	36.23	60.8	222	130	216	186	275	318.33	338	435.67	2.8	5.8	3.1	3.6	5.22	5.63	4.3	5.59	1	5	2	3	2	0	1	1	15	3	1	3	1	1	0	1	0	0	0	10
378	female	45	1 2 3 4 5	24	1	66	45	116	72	58.53	77.7	19.8	78.57	287.67	151	221.33	181	442	407	437	402.67	3.5	3.9	3.4	4.6	5.22	5.33	5.09	5.43	7	8	0	0	9	0	0	0	24	0	1	1	3	0	0	3	0	0	0	8
379	female	37	1 2 3 4 5	120	1	76	32	67	86	49.83	45.23	40.97	43.77	181	183	221.33	236	341.33	421	363	267	8.1	8.2	4.1	6.2	4.67	5.73	5.86	5.77	5	6	5	1	1	1	0	0	19	1	1	0	1	2	0	2	0	0	0	7
380	female	27	1 2 3 5	7	2 3	46	58	142	29	43.03	60	24.27	67.4	133.67	147.5	213.67	165	362.67	322.5	357.67	242	0.8	4.8	5.9	4.2	5.44	5.78	5.73	5.83	7	2	2	0	7	0	0	0	18	3	1	3	0	0	0	1	0	0	0	8
381	female	44	2 3 4 5	12	2	70	24	209	82	32.37	37.5	64.63	54.4	194.33	150.33	232	171.67	482.33	571.33	421.33	626.33	7.9	2.5	1.7	16.2	5.25	5.6	5.25	5.68	5	9	0	0	8	0	0	0	22	3	1	1	3	2	0	0	0	0	0	10
382	female	46	1 2 3 4 5	24	2 3	41	55	55	43	47.93	55.77	23.37	52.33	175	156.67	231	139.67	425	510.67	386	534.33	11.6	15.6	7.2	16	5.18	5.32	0.8	5.31	5	6	0	0	5	0	0	0	16	0	0	3	0	2	0	0	0	0	0	5
383	female	26	2 3 4 5	6	2	56	29	108	29	46.87	37.37	21.27	63.23	187	158	206.33	202	572	366	404	552.5	5.5	4.4	5.9	5.2	4.6	5.12	5.6	5.19	7	9	0	0	5	0	0	0	21	3	1	2	3	0	0	0	0	0	0	9
384	female	32	1 2 3 4 5	7	2 3	75	55.5	227	60	36.1	32.9	21.4	43.4	158	106	181	171.67	330	435	464.67	459	18	2	3.9	15.1	4.68	4.85	4.68	4.86	5	5	0	3	4	0	0	0	17	3	2	3	3	2	0	2	0	0	0	15
385	female	32	1 2 3 4	48	1	39	28	138	83	67.1	74.27	49.03	69.13	198	164	268.33	277	397.33	373.67	365	537	3.9	3.5	1.3	8	5.31	4.26	5.31	5.31	9	5	5	3	2	0	2	0	26	2	3	3	0	1	0	2	0	0	0	11
386	female	24	1 2 3 4 5	12	2 3	52	51	75	55	60	54.93	30.33	68.63	178	131.67	240.33	182.67	310.33	329	502.33	465.67	4	2.8	2.3	3.1	5.44	5.45	5.44	5.54	9	0	0	0	1	1	2	2	15	3	1	3	0	1	0	0	0	0	0	8
387	female	25	2 3 4 5	12	2 3	9	4	74	46	32.9	33.13	66	44.87	132	122	191.33	157	300.33	408.67	619	423.67	4.5	3	1.7	1.5	5.57	5.69	5.57	5.33	7	0	0	0	8	0	0	0	15	3	1	3	0	0	0	0	0	0	0	7
388	female	45	1 2 3 4 5	48	1	7	38	36	8	61.87	62.23	49.57	41.03	180.5	51	235.67	291	397	493.67	638.67	580	6.2	6.6	11.1	5.3	5.09	5.38	5.09	5.27	9	2	0	0	2	1	0	1	15	3	1	1	1	1	0	1	0	0	0	8
389	female	55	1 2 3 4 5	144	2 3	89	152	260	51	52.3	26.53	47.17	51.43	184.3	160	222.33	179.67	392	416.33	452	549	4.8	25.8	6.2	9.8	5.09	3.28	5.16	5.09	7	3	5	0	5	5	0	0	25	3	1	3	3	3	0	1	0	0	0	14
390	female	35	1 2 3 5	144	2 3	35	13	32	13	64.93	56.7	16.63	44.6	147.67	101.7	214	170.33	329.67	358.33	372	407.33	9.8	18.5	2.2	10.8	5.38	6.53	5.38	5.4	5	5	2	0	2	5	0	0	19	1	1	3	0	2	0	1	0	0	0	8
391	female	40	1 2 3 4 5	6	1 2	39	31	44	37	28.5	35.6	38.93	47.47	206.3	153	230	245.3	428.67	516.67	425	263	7.8	1.9	7.7	8	5.62	5.92	5.33	5.55	1	0	0	1	9	0	0	1	12	3	1	1	3	0	0	0	0	0	0	8
392	female	27	1 2 3 4	12	2	220	154	207	178	51.87	66.1	53.6	56.3	168.33	151	212	210.67	438.33	384.33	513.33	448	3	6.6	3.1	8.1	4.55	5.9	5.41	5.35	1	1	1	0	1	0	0	0	4	0	1	0	2	0	0	0	0	0	0	3
393	female	21	2 3 4 5	60	1 3	48	6	20	21	48.73	64.67	49	42.17	191.33	174.67	186	261	241	218	333.33	444.5	4.9	2.4	3.8	13.7	5.78	5.63	5.52	5.72	3	4	1	3	5	0	2	0	18	3	1	3	0	1	0	1	0	0	0	9
394	female	20	2 3 5	60	1	8	6	74	36	54.9	47.8	49.4	33.7	135.67	125.5	212.67	161.5	304	509	437	494	8.7	2.8	6.1	9.3	5.42	5.81	5.52	5.56	5	2	1	0	1	0	0	0	9	3	1	0	3	2	0	2	0	0	0	11
395	female	52	2 3 5	96	1 3	40	52	30	49	69.4	60.1	50.1	76.44	182.33	194.67	250	154.5	299.33	401.67	376	410.5	7.2	7.6	2.5	6.3	4.99	5.73	5.39	5.61	8	5	8	5	10	7	0	8	51	3	1	3	3	2	0	2	0	0	0	14
396	female	37	1 2 3 4	60	2	70	54	135	54	64.7	59	52.3	73.83	164.67	144	206.67	183	343.67	400.67	424	625	5.9	8.6	11.4	6.1	4.91	5.87	5.64	5.66	8	0	2	3	9	0	0	2	24	3	1	1	3	3	0	0	0	0	0	11
397	male	27	2 3 4	12	2 3	89	65	157	65	60.57	64.4	54.73	55.47	226.67	248.67	224.67	317.67	400.67	522.33	705	514	3.9	5.8	1.6	7.3	4.05	6.08	3.1	5.53	1	5	1	0	4	1	0	0	12	3	3	3	1	1	0	2	0	0	0	13
398	female	26	1 2 3 5	24	1	114	71	138	186	64.83	70.13	35.93	54.03	198	112.33	201.67	194.67	402.33	330.33	386	560.67	1.3	2.2	2.4	3.5	4.83	5.28	5.1	5.19	1	1	6	6	5	4	8	1	32	3	1	0	3	1	0	1	0	0	0	9
399	female	23	1 2 3	24	1	0	0	114	0	35.73	12.97	28.33	38.17	155.33	103	168.33	190.3	525.33	361.67	438.33	562.67	19.3	20.3	7.2	13.9	5.51	5.73	4.91	5.41	3	10	3	3	8	2	2	1	32	3	1	0	1	1	0	1	0	0	0	7
400	female	39	1 2 3	12	1	13	6	0	30	46.57	32.57	51.33	46.2	144	111.667	191.33	185	339.667	418	281	640	21.7	27.3	11.2	19.1	5.38	5.67	5.53	5.84	5	5	2	0	2	1	0	0	15	3	2	0	2	2	0	2	0	0	0	11
401	female	40	1 2 3	72	2	42	12	13	32	38.77	34.53	35.67	73.03	164.33	197.5	235.67	181	366.33	533.75	304	516	11.1	20.9	6.5	10.7	5.36	5.75	5.45	5.64	1	1	0	0	7	0	0	0	9	3	1	1	1	1	0	1	0	0	0	8
402	female	37	1 2 3	24	2	124	121	42	65	43.9	25.33	42.33	56.27	210	153.67	182.33	269	396.75	496.33	299.33	528	6.2	7	5.9	10.9	0.5	2.8	6.03	1.7	8	0	1	0	5	0	0	0	14	2	0	1	0	0	0	1	0	0	0	4
403	female	40	1 2 3	48	1	128	38	124	28	40.05	20.97	47.5	44.9	165.667	162.667	164.67	200.33	446.667	432	343.67	494.667	8.4	1	6.2	0.6	4.87	5.85	4.97	5.98	8	0	3	3	8	0	0	0	22	2	1	1	2	1	0	2	0	0	0	9
404	female	17	1 2 3	6	2 3	30	27	128	17	41.53	47.17	51.87	55.4	134.33	68.33	206.67	163.33	438.67	422	400.67	483.33	29.3	24.9	7.9	19.9	5.38	5.4	4.71	5.41	8	1	1	3	5	0	0	0	18	3	1	3	1	2	0	1	0	0	0	11
405	female	35	1 2 3	24	2	66	112	260	109	60.13	41.93	28.73	53	178	132.33	161.5	193	488.33	508.67	513.33	476.67	2.8	5	2.9	10.3	5.08	5.47	5.44	5.19	3	4	3	4	4	0	0	0	18	3	0	1	3	1	0	1	0	0	0	9
406	female	22	1 2 3	12	2 3	21	51	32	37	60.2	51.2	34.9	53.83	190	160	215.3	217	362	488	333.33	497	5.5	3.6	5.5	7	5.51	4.31	5.03	5.4	5	1	3	1	2	1	0	1	14	3	2	3	0	2	0	1	0	0	0	11
407	female	53	1 2 3	156	1	25	15	44	29	57.73	46.3	49.4	54.97	149.67	111.33	183	216.67	361.33	493	437	524.67	3.3	7.2	7.4	6.5	5.3	5.32	5.55	5.38	8	8	3	1	5	8	0	0	33	1	3	2	3	2	0	3	0	0	0	14
408	female	24	1 2 3	6	2	2	1	267	3	31.3	36.23	46.6	34.97	145	166	217.67	288.67	297	399	330.33	429.67	59	1.8	7	15	4.6	4.87	4.19	1.53	9	3	2	0	9	0	0	0	23	3	1	1	2	1	0	1	0	0	0	9
409	female	46	1 2 3	6	1	25	15	171	35	40.57	66.4	48.23	51.67	127	125.33	214.67	153	377	419.33	361.67	494.33	3.1	5.5	6.3	10.8	5.41	5.77	4.16	6	4	4	3	3	0	0	0	0	14	3	2	1	0	1	0	1	0	0	0	8
410	female	28	1 2 3	24	2	44	33	20	33	53.8	54.37	55.9	58.33	145.67	114.33	233.3	190.67	466.33	478.67	56.67	538.67	11.4	2.3	6	6.9	5.32	5.46	4.43	5.47	5	1	0	0	2	0	0	0	8	3	2	0	0	2	0	1	0	0	0	8
411	female	65	1 2 3	60	1	7	20	84	42	43.6	20.3	52.67	61	109	84.33	213.67	177.67	420.3	460.67	384.5	297	17.7	7	6.4	24.6	4.35	4.7	4.91	4.67	3	3	0	3	0	0	0	0	9	3	3	3	3	1	0	1	0	0	0	14
412	female	42	1 2 3	48	2	13	21	140	79	45.39	39.23	52.97	65.47	168.33	110.33	161.67	214.67	316.33	317.67	494	413.67	8.5	13.3	7.1	7.1	5.44	5.42	5.53	5.48	1	1	1	0	2	0	0	0	5	3	1	1	2	1	0	1	0	0	0	9
413	female	40	1 2 3	48	2	54	62	135	62	54.3	67.07	30.33	62.73	311.7	197.33	215.67	211.67	577.67	496	410.5	490	6.4	6	2.4	4.8	5.1	5.41	5.45	4.87	7	0	2	0	0	0	2	0	11	3	1	1	3	0	0	1	0	0	0	9
414	female	39	1 2 3	60	1	122	24	157	44	44.9	56	37.3	60	213	191	217	235	394	521	430	527	6.2	2.9	2.5	15.3	4.19	5.03	6.03	4.85	9	2	2	0	0	0	0	0	13	3	2	1	3	1	0	1	0	0	0	11
415	female	26	1 2 3	96	2	54	12	138	69	52.97	68.3	26.97	69.3	157.67	132.33	157	146.67	373.67	429.33	437.33	473	4.6	2.6	6.8	7.7	5.16	5.85	4.97	5.51	8	0	0	0	0	0	2	0	10	0	1	1	1	1	0	0	0	0	0	4
416	female	20	1 2 3	24	2 3	42	10	74	30	30.33	34.17	16.33	42	172.67	176	262	233.3	316.67	456.67	425.67	414	5.8	25.2	11.7	15.2	4.43	4.94	5.38	4.81	4	3	0	0	0	0	0	0	7	3	1	3	0	1	0	0	0	0	0	8
417	female	44	1 2 3	12	2 3	27	36	94	97	57.27	77.9	34.37	73.4	161.67	183	296	250.67	354.33	379.33	446	526.67	9.3	2.9	16.1	11.2	4.91	5	4.68	4.88	8	2	2	3	0	0	0	2	17	0	2	3	0	1	0	1	0	0	0	7
418	female	21	1 2 3	8	2 3	124	34	75	141	54.5	62.67	52.2	56.1	193.67	176	266.33	220.67	467.23	447.33	497.67	486	2.2	6	5.3	6.5	5.53	5.46	4.69	5.17	3	0	3	0	1	2	0	0	9	3	2	3	3	1	0	0	0	0	0	12
419	female	38	1 2 3	24	2	33	36	94	81	58.1	47.9	23.9	54.37	203.33	163.33	229	224	517.6	533	512	533	6.4	5.1	3.5	5.9	5.45	5.71	5.42	5.36	1	1	1	1	1	1	1	0	7	3	3	1	0	1	0	0	0	0	0	8
420	female	38	1 2 3	60	2	124	19	26	22	51	50	36	46.6	183	209	207	243	508	548	620	695	7.1	39	4.4	9.2	4.03	5.6	4.86	5.55	2	3	3	0	0	2	0	0	10	3	0	1	3	0	0	0	0	0	0	7
421	female	28	1 2 3	24	2	28	0	69	0	35.97	60.87	52.97	48.23	142	161.2	190.67	170.67	253	368	635	367	8.4	1.1	7.9	7.9	4.97	5.51	5.55	4.99	3	0	3	0	4	0	3	0	13	3	1	1	3	1	0	0	0	0	0	9
422	female	32	1 2 3	72	2 3	22	31	30	28	43.78	59.4	30.33	55.9	148	103	177.67	173	369	471	664	466	8.5	1.7	7.5	9.9	4.71	4.67	4.47	4.76	5	1	0	1	2	0	2	0	11	3	0	3	0	1	0	1	0	0	0	8
423	female	29	1 2 3	60	1	187	18	0	198	45.47	48.67	0	52.67	200	149.67	209	263.67	472	505.33	552	424	4.3	1.2	6.9	6.2	5.44	5.59	9	5.56	6	5	0	0	2	0	2	0	15	1	3	3	2	1	0	0	0	0	0	10
424	male	41	1 2 3	60	1	44	26	142	44	39.33	78.47	13.87	81.2	214.33	194.33	280	248	368	419	449	510.33	4.7	5.5	7.7	7	5.03	5.41	4.85	5.24	2	3	0	0	0	0	0	0	5	3	3	1	3	0	0	1	0	0	0	11
425	female	32	1 2 3	24	1	50	21	42	103	46.47	39.17	35.4	59.97	198	182.67	176	267.61	265.67	351.33	444.67	521.33	10.2	38.3	11.7	18.9	5.55	5.48	5.29	5.24	2	2	2	0	0	2	0	5	13	0	3	3	3	1	0	1	0	0	0	11
426	female	40	1 2 3	240	1	73	26	38	163	51.5	52.1	31.7	64.73	168.33	172.33	195.33	212.67	457.33	443.33	347	467	2.5	4.7	1.6	4.4	4.47	4.71	4.67	4.66	8	0	2	0	0	1	0	0	11	0	1	1	2	1	0	1	0	0	0	6
427	female	24	1 2 3	24	1	70	36	62	25	62.2	70.8	56.2	63.65	183.6	154.5	203.33	206.67	555	380.5	449.33	578.5	6.4	5.4	7.2	9.8	5.84	6.08	6.17	5.85	1	0	0	1	0	0	0	1	3	1	0	2	1	0	0	2	0	0	0	6
428	female	24	1 2 3	24	2	66	37	135	105	41.87	45.57	78	44.37	202	163.33	282.4	276.33	460.33	502.33	610	520.67	8.4	2.3	7.9	9.2	5.39	5.6	9.2	5.79	1	0	0	1	0	0	0	1	3	2	1	1	3	0	0	0	0	0	0	7
429	female	34	1 2 3	12	1	46	19	102	136	55.7	82.4	54.27	20.1	188.83	130.67	214.75	231.83	329.33	267.67	495.75	467.67	4.3	2	11.7	9.4	5.14	5.29	4.56	5.13	1	0	0	1	0	0	0	1	3	3	0	0	2	1	0	1	0	0	0	7
430	female	20	1 2 3	60	2	118	5	96	19	45.2	42.37	47	65.37	170	226	295	317.3	451	537	566.7	505.3	7.9	29.6	6.8	12.7	4.26	4.71	0.8	1.5	2	3	0	0	0	0	0	0	5	3	3	3	1	1	0	0	0	0	0	11
431	female	31	1 2 3 4 5	12	2 3	138	35	100	34	61.3	64.97	11.23	53.73	200	125.33	229.33	182.67	478	514.33	444	444	7	8.3	4.4	6.2	5.21	4.97	4.83	5.03	3	6	5	3	6	4	4	3	34	3	1	3	3	0	0	0	0	0	0	10
432	female	59	1 2 3 4 5	24	2 3	116	19	209	153	53.2	49.83	36.23	60.8	222	130	156	186	215	318.33	338	435.67	2.8	5.8	3.1	3.6	5.22	5.63	4.7	5.59	2	3	0	0	0	0	0	0	5	2	3	0	2	2	0	0	0	0	0	9
433	female	30	1 2 3 4 5	24	2 3	166	25	116	52	31.53	77.7	19.8	78.57	287.67	151	221.33	181	462	407	437	402.67	3.5	3.9	3.4	4.6	5.22	4.33	5.09	5.43	2	3	0	0	0	0	0	0	5	3	1	3	1	1	0	0	0	0	0	9
434	female	44	1 2 3 4 5	60	1	56	22	57	86	39.83	45.23	40.97	43.77	181	183	221.33	236	341.33	421	363	226	8.1	8.2	4.1	6.2	4.8	5.73	4.8	5.77	5	1	3	1	2	1	0	1	14	3	3	1	3	3	0	1	0	0	0	14
435	female	51	1 2 3 5	7	2	46	26	42	121	53.03	60	14.27	67.4	133.67	147.5	237	165	362.67	322.5	357.67	642	0.8	4.8	5.9	4.2	5.44	5.78	5.73	5.83	5	1	3	1	2	1	0	1	14	1	2	2	1	1	0	0	0	0	0	7
436	male	54	2 3 4 5	12	2	30	16	28	24	32.37	37.5	45.47	54.4	194.33	150.33	212.67	171.67	482.33	571.33	419	626.33	7.9	1.5	8.1	16.2	5.25	5.6	5.31	5.68	5	1	3	1	2	1	0	1	14	1	1	0	0	1	0	0	0	0	0	3
437	female	20	1 2 3 4 5	24	2 3	41	35	82	43	47.93	55.77	39.33	52.33	175	156.67	206.67	139.67	508	510.67	351.33	534.33	11.6	15.6	0.8	16	5.18	3.32	5.44	5.31	5	1	3	1	2	1	0	1	14	1	1	3	0	1	0	1	0	0	0	7
438	female	34	2 3 4 5	6	2 3	56	29	44	29	46.87	37.37	19.47	63.23	187	158	276.33	202	525	366	443.33	552.5	5.5	3.4	7.9	5.2	4.7	5.12	5.57	5.19	4	1	2	5	0	2	0	0	14	3	2	3	0	0	0	1	0	0	0	9
439	female	52	1 2 3 4 5	7	2	75	50.5	113	60	46.1	52.9	51.5	43.4	158	106	231.83	171.67	330	443	380.5	459	6	0.2	11.6	15.1	4.68	4.85	5.09	4.86	4	1	2	5	0	2	0	0	14	1	3	1	3	0	0	0	0	0	0	8
440	female	32	1 2 3 4	48	2 3	39	28	61	83	67.1	74.27	32.2	69.13	198	164	217.3	277	397.33	373.67	502.33	537	3.9	3.5	5.5	8	5.31	4.26	5.09	5.31	4	1	2	5	0	2	0	0	14	1	1	3	0	2	0	1	0	0	0	8
441	female	23	1 2 3 4 5	12	2	52	140	25	55	60	54.93	53.87	68.63	178	131.67	198	182.67	310.33	329	267.67	465.67	4	2.8	1	3.1	5.44	5.45	5.38	5.54	2	3	0	0	0	0	0	0	5	1	0	1	0	1	0	1	0	0	0	4
442	female	33	2 3 4 5	144	2	9	4	105	46	32.9	33.13	55.7	44.87	132	122	168.33	157	300.33	408.67	520.67	623.67	4.5	3	3.9	1.5	5.57	5.69	5.62	5.33	2	3	0	0	0	0	0	0	5	0	1	2	1	0	0	0	0	0	0	4
443	female	43	1 2 3 4 5	48	1	8	38	36	8	61.87	62.23	66	41.03	125.7	51	183.33	323	397	493.67	467.67	580	6.2	6.6	24	5.3	5.09	4.38	5.73	5.27	2	3	0	0	0	0	0	0	5	1	1	0	1	2	0	2	0	0	0	7
444	female	41	1 2 3 4 5	240	2	106	31	188	51	52.3	26.53	47.17	51.43	183	160	222.33	179.67	392	416.33	452	649	4.8	21.8	4.5	9.8	5.09	5.28	2.6	5.09	2	5	5	3	2	0	2	0	19	1	2	0	1	1	0	1	0	0	0	6
445	female	36	1 2 3 5	12	2 3	35	83	32	13	34.93	56.7	16.63	44.6	147.67	199	224	170.33	329.67	358.33	372	407.33	9.8	18.5	2.2	10.5	5.38	7.53	5.38	5.4	2	5	5	3	2	0	2	0	19	2	1	3	3	2	0	0	0	0	0	11
446	female	37	1 2 3 4 5	6	1 2	39	31	39	37	48.5	35.6	38.93	47.47	206.3	153	230	245.3	428.67	516.67	425	260	7.8	1.9	7.7	8	5.62	5.92	5.33	5.55	2	5	5	3	2	0	2	0	19	3	1	2	1	2	0	1	0	0	0	10
447	female	40	1 2 3 4	90	2	198	24	267	178	51.87	66.1	53.6	56.3	168.33	151	212	210.67	438.33	384.33	513.33	448	3	6.6	2.1	8.1	4.65	5.9	5.41	5.35	8	0	2	0	0	1	0	0	11	1	2	2	0	0	0	1	0	0	0	6
448	female	34	2 3 4 5	60	1	38	110	20	21	28.73	64.67	49	42.17	191.33	174.67	186	261	281	328	333.33	444.5	4.9	2.4	3.8	13.7	5.78	5.63	5.52	5.72	8	0	0	0	1	2	0	0	11	1	1	1	1	0	0	1	0	0	0	5
449	female	24	2 3 5	60	1	8	36	85	36	34.9	47.8	49.4	33.7	135.67	125.5	172.67	161.5	304	509	437	494	8.7	2.8	5.1	9.3	5.42	5.81	5.52	5.56	8	2	0	0	0	0	0	0	10	0	1	0	0	0	0	1	0	0	0	2
450	female	50	2 3 5	240	2 3	40	22	112	149	69.4	60.1	50.1	76.44	182.33	194.67	247	154.5	207.8	401.67	376	410.5	7.2	7.6	2.5	6.3	4.99	5.73	5.39	5.61	8	2	0	0	0	0	0	0	10	1	2	3	2	2	1	3	0	0	0	14
451	male	44	1 2 3 4	276	2	70	24	141	54	64.7	59	52.3	73.83	164.67	144	196.67	183	343.67	400.67	424	465.67	5.9	8.6	11.4	6.1	4.71	5.87	5.64	5.66	8	0	8	0	0	0	0	0	16	1	2	2	1	1	0	1	0	0	0	8
452	female	53	2 3 4	90	2 3	111	22	150	65	60.57	64.4	54.73	55.47	226.67	248.67	224.67	317.67	400.67	522.33	705	514	3.9	5.8	6.6	7.3	4.05	6.08	1.16	5.53	3	9	4	9	8	0	3	0	36	2	1	1	1	1	0	2	0	0	0	8
453	female	34	1 2 3 5	24	1	124	71	131	191	64.83	70.13	15.93	54.03	198	112.33	209.67	194.67	402.33	330.33	386	560.67	1.3	2.2	3.4	3.5	4.83	4.28	5.1	5.19	3	9	4	9	5	0	3	0	33	1	2	1	2	0	0	0	0	0	0	6
454	female	50	1 2 3	24	1	0	104	167	0	35.73	12.97	14.93	38.17	155.33	103	258.33	190.3	605.33	361.67	516.67	156	19.3	20.3	6.6	13.9	5.51	5.73	5.41	5.41	5	9	3	7	5	3	2	0	34	1	2	1	2	1	0	0	0	0	0	7
455	female	50	1 2 3	90	1	113	118	32	30	46.57	32.57	28.5	46.2	144	111.667	216.67	185	339.667	418	384.33	479	21.7	27.3	2.4	19.1	5.38	5.67	5.32	5.84	5	9	3	7	5	3	2	0	34	1	1	2	1	1	0	0	0	0	0	6
456	female	43	1 2 3	90	2 3	142	112	38	32	69.77	34.53	51.87	73.03	164.33	299	284.33	181	366.33	533.75	343.67	516	11.1	20.9	7.8	5.7	5.36	5.75	4.35	5.64	5	9	3	7	7	3	2	0	36	1	1	3	2	1	0	2	0	0	0	10
457	female	47	1 2 3	24	2	124	20	167	65	43.9	25.33	28.73	56.27	210	153.67	288	269	396.75	496.33	400.67	528	6.2	7	7.6	10.9	1	1	5.44	1.9	5	2	7	3	0	0	0	0	17	1	1	2	2	1	0	1	0	0	0	8
458	female	50	1 2 3	48	1	128	38	20	28	40.05	20.97	34.9	44.9	165.667	162.667	209	200.33	446.667	432	402.33	494.667	8.2	31	11.7	24	5.67	5.85	5.09	5.98	5	2	7	3	0	0	0	0	17	1	3	3	2	0	0	0	0	0	0	9
459	female	33	1 2 3	6	2	30	27	81	17	41.53	47.17	29	55.4	134.33	68.33	401.67	163.33	438.67	422	405.33	326.33	29.3	24.9	2.3	19.9	5.38	5.4	5.38	5.41	5	2	7	3	0	0	0	0	17	1	1	2	1	1	0	0	0	0	0	6
460	female	36	1 2 3	24	2	36	12	120	109	60.13	41.93	56.7	53	178	132.33	200.6	193	488.33	508.67	339.667	476.67	2.8	50.5	19	10.3	5.08	5.47	5.62	5.19	5	2	7	3	0	0	0	0	17	1	1	2	1	1	0	1	0	0	0	7
461	female	34	1 2 3	72	2	21	51	145	37	60.2	51.2	35.6	53.83	190	160	206.3	217	362	488	366.33	497	5.5	3.6	7.1	7	5.51	3.31	5.65	5.4	8	0	0	0	1	2	0	0	11	1	1	1	1	0	0	1	0	0	0	5
462	female	43	1 2 3	240	1	25	115	157	29	57.73	26.3	16.1	54.97	149.67	111.33	168.33	216.67	361.33	493	449.33	524.67	3.3	7.2	20.8	6.5	5.3	5.32	5.78	5.38	5	0	5	0	0	2	3	0	15	1	1	0	1	2	0	2	0	0	0	7
463	female	41	1 2 3	6	2	2	121	138	123	31.3	36.23	24.67	34.97	145	166	191.33	129.67	297	399	407.33	429.67	46	1.8	7.9	15	4.6	4.87	5.45	1.53	5	0	5	0	0	2	3	0	15	1	2	0	1	1	0	1	0	0	0	6
464	female	36	1 2 3	6	2 3	25	45	44	35	68.57	66.4	56.3	51.67	127	125.33	267	153	377	419.33	360.3	494.33	3.1	5.5	11.6	10.8	5.41	5.77	5.69	6	5	0	5	0	0	2	3	0	15	3	1	3	3	2	0	0	0	0	0	12
465	female	37	1 2 3	24	2	44	43	127	33	53.8	54.37	42.17	58.33	145.67	114.33	170.33	190.67	466.33	478.67	448	538.67	11.4	2.6	5.5	6.9	5.32	5.46	5.38	5.47	5	0	5	0	0	2	3	0	15	3	1	2	1	2	0	1	0	0	0	10
466	female	40	1 2 3	60	1	7	120	20	42	43.6	40.3	33.7	61	129	84.33	230	177.67	420.3	460.67	384.5	296.7	17.7	7	16	24.6	4.35	4.7	5.28	4.67	8	0	1	0	0	2	0	0	11	1	2	2	0	0	0	1	0	0	0	6
467	female	33	1 2 3	36	2	13	21	70	79	45.39	39.23	52.97	65.47	168.33	110.33	210.67	214.67	214.33	317.67	494	413.67	8.5	43	1.9	7.1	5.44	5.42	5.53	5.48	5	0	5	0	0	2	3	0	15	0	1	2	1	0	0	0	0	0	0	4
468	female	23	1 2 3	36	2	54	22	122	62	54.83	67.07	30.33	62.73	300.67	197.33	244	211.67	577.67	496	410.5	290	6.4	6	4	4.8	5.1	5.41	4.92	4.87	5	0	5	0	0	2	3	0	15	1	0	1	0	1	0	1	0	0	0	4
469	female	51	1 2 3	60	1	22	24	135	44	44.9	56	37.3	60	213	191	217	235	394	521	430	478	6.2	3.9	4.5	15.3	4.19	5.03	5.05	4.85	5	0	5	0	0	2	3	0	15	1	2	2	1	1	0	0	0	0	0	7
470	male	54	1 2 3	240	2	54	62	157	69	52.97	68.3	26.97	69.3	157.67	132.33	157	146.67	373.67	429.33	466.33	473	4.6	1.6	6.8	7.7	5.16	5.85	5.39	5.51	5	0	5	0	0	2	3	0	15	1	1	0	0	1	0	0	0	0	0	3
471	female	20	1 2 3	24	1 3	42	105	54	30	32.33	34.17	16.33	42	172.67	176	262	233.3	316.67	456.67	425.67	414	7.8	25.2	11.7	15.2	4.43	4.94	5.38	4.81	5	0	5	0	0	2	3	0	15	1	1	3	0	1	0	1	0	0	0	7

## Sheet: nasal group
			Demographic features															Physiological indicators of epidermal barrier function															Values of self-reported symptoms										Doctor-evaluated grading severity
Number	Sex	Age	Invovled site	Duration	Stage	Oil content(μg·m-2)					Water content				Melanin				Haemoglobin				TEWL				PH			Burning	Dry	Itching	Stinging	Skin tension	Swelling	Ant line sense	Pain	Overall symptoms	Flushing	Non-transient erythema	Papulopustules	Telangiectasia	Burning/stinging	Plaques	Dry	Edema	Outside the facial symptoms	Phymatous	Total
				(months)		Forehead	Cheek	Nose	Chin	Forehead	Cheek	Nose	Chin	Forehead	Cheek	Nose	Chin	Forehead	Cheek	Nose	Chin	Forehead	Cheek	Nose	Chin	Forehead	Cheek	Nose	Chin
1	female	50	4	10	4	72	50	39	56	43.8	33.87	62.17	46.03	198	156	253	215.67	274	271	353.33	347	1.9	5.6	5.6	6.8	5.36	5.42	5.14	5.25	0	0	5	3	0	0	0	0	8	0	1	1	0	0	0	0	0	0	1	3
2	male	23	4	24	4	37	38	68	42	33.93	26	65.73	52.33	196.67	160.67	242.33	255.67	350	539.33	303	408.33	5.1	5.4	7.2	7.4	4.93	5.08	5.04	4.93	4	1	1	0	0	2	2	3	13	2	1	0	0	1	0	1	1	1	2	9
3	female	24	4	12	4	12	12	97	72	36	43.3	37.3	36.2	422	233	344	200	501	250	471.67	359	3.6	5.2	4.4	5	5.83	5.48	5.12	5.2	3	5	3	2	3	3	1	4	24	1	2	1	1	1	0	1	0	0	2	9
4	male	24	4	36	4	87	72	119	27	41.8	21.63	51.57	49.87	130	147.67	235	220	493	494.67	738	421.67	4.2	7.1	1.3	6	5.06	5.1	5.51	5.1	4	0	0	0	0	0	0	0	4	1	1	2	1	0	0	0	0	0	2	7
5	male	43	4	36	4	13	14	260	15	54.9	28.13	65.5	51	244	224	235.33	279.3	369	406	300	493.3	4.1	2.4	1.6	3.6	5.43	5.33	5.02	5.54	1	1	3	1	0	0	0	0	6	1	2	2	1	0	0	1	0	0	1	8
6	male	27	4	6	4	67	103	93	102	56.7	53.7	67	19.23	184	256	248.33	271	461	555	405.33	496	11.7	4.9	9.6	13.4	5.46	4.73	5.09	5.42	2	0	2	0	0	4	0	0	8	1	3	2	2	1	3	2	2	0	2	18
7	female	44	4	18	4	49	7	21	39	62.17	69.47	34.7	77.5	226	215.67	248.5	253	315	325.67	569	385	2.3	1.8	4.6	7.5	4.68	4.4	5.7	4.46	0	0	3	0	0	0	0	0	3	0	1	0	3	0	0	0	0	0	3	7
8	female	34	4	6	4	77	23	59	28	65.73	67.5	41.53	50.43	213	160	221.33	242.33	326.67	342.33	532.33	447.67	5.6	5.5	2.4	9.1	5.06	5.03	4.78	4.85	3	3	1	2	0	2	2	6	19	1	2	1	2	1	0	1	0	0	2	10
9	male	21	4	12	4	40.67	50	161	97.33	37.3	61.6	36.53	49.23	288	192.67	327.67	354	385	308.67	494	387.33	5	4.9	1.8	4.2	5.69	4.89	4.98	4.65	0	0	0	0	0	3	0	0	3	1	2	1	1	0	0	0	0	0	2	7
10	female	29	4	12	4	187	128	197	119	51.57	41.97	57.53	73	222.67	200.25	295	225	347.33	320.5	522	522	4.8	1.2	17.2	7.5	4.81	5.16	5.01	4.95	0	0	0	0	0	0	0	0	0	1	3	2	3	0	0	0	0	0	3	12
11	male	26	4	36	4	225	107	176	220	65.5	34.4	36.27	38.27	331.33	214.33	251.67	234.67	377.67	333.67	637.67	635	5.3	8	7.4	4	4.78	5.05	5.2	5.11	0	2.5	0	0	0	6	0	4	12.5	1	3	1	3	1	0	0	0	0	2	11
12	female	35	4	12	4	92.67	12	145	93	67	73.6	55.9	43.6	230.33	128	222.33	238.33	445.33	258	624	453	2.3	1.7	7	7.7	5.62	5.89	4.92	5.69	0	0	0	0	0	0	0	0	0	1	2	0	1	0	2	0	0	0	1	7
13	male	40	4	7	4	84	78	68	21	53.3	38.5	56	57.5	307	209.5	239.5	362.5	450	436.5	630	537	9.5	2.6	6.7	7.7	5.14	5.3	4.89	4.91	3	4	3	1	3	0	0	0	14	1	3	0	3	2	1	0	0	0	2	12
14	male	39	4	24	4	119	125	143	196	35.67	40.83	58.53	21.57	228.33	220.83	245.67	265.33	431	505.83	595.33	587.67	4.4	7.1	8.2	8.9	5.94	5.54	5.52	5.66	0	0	0	0	0	0	0	0	0	0	2	1	0	0	0	0	0	0	2	5
15	male	44	4	12	4	99	84	98	60	38.9	46.3	39.1	42.56	389	204	325	441	686.5	432	661	606	2.2	11.1	7.5	8.3	5.12	5.27	5.02	4.86	0	0	0	0	0	0	0	0	0	0	3	1	2	0	2	0	0	0	3	11
16	female	25	4	24	4	34	7	69	53	42	65.4	15.6	62.5	179	162.67	227.33	216	358	233.33	554	463.67	4.4	1.7	9.6	7.6	5.51	5.29	5.38	5	0	0	1	0	0	0	0	0	1	2	2	1	3	0	2	0	0	0	1	11
17	female	15	4	24	4	150	30	91	50	51.37	49.7	59.13	51.67	137	116.33	237.67	199.67	353.33	230.67	513	300.33	2.3	8.5	4.6	2.5	5.02	5.28	5.06	5.17	0	0	0	0	0	0	0	0	0	0	1	1	0	0	0	0	0	0	1	3
18	female	26	4	12	4	13.33	4	48	41	81.37	81.03	60.6	74.6	176.33	144	189.33	204.67	303	269.67	408	306	4.6	1.3	7.7	7.3	5.09	5.25	4.86	5.26	0	0	0	0	0	0	0	0	0	0	1	1	0	0	0	0	0	0	1	3
19	female	43	4	36	4	245	136	293	239	55.33	53.33	39.7	64.27	267.33	254.33	169	313	471.67	471.33	506.67	583.33	1.2	2.6	14.1	17.8	5.7	5.37	5.06	4.94	3	4	3	0	0	1	0	3	14	3	1	0	1	3	0	3	0	0	2	13
20	female	19	4	12	4	149	48	66	154	50.5	89.3	65.53	55.6	215.33	169.33	224	231	338	213	556.33	401.67	5	1.8	7.4	0.8	4.78	5.07	4.84	4.89	0	0	0	0	0	0	0	0	0	2	3	0	3	0	0	0	0	0	1	9
21	female	21	4	24	4	73	55	107	188	74.57	65.4	59.23	73.3	183	179	262	274.67	300	455.67	477	520	3.3	10.4	12	6.1	5.12	5	5.2	4.99	0	0	3	0	1	4	2	4	14	1	0	0	0	0	0	0	0	0	3	4
22	male	17	4	6	4	49	48	186.67	44	48.43	46	31.2	46.02	173	160	106.33	254	405.33	341	785	525	3.8	3.1	10.6	6.9	4.97	4.65	4.92	4.78	0	0	0	0	0	0	0	0	0	0	1	1	1	0	0	0	0	0	3	6
23	male	80	4	18	4	26	21	81	54	62	46.17	34.2	50	262	299	92	292	390	463	736	490	2	10.1	5	8.8	4.23	4.58	4.76	4.95	3	3	3	0	1	1	2	0	13	2	3	1	0	1	3	2	2	0	3	17
24	female	28	4	6	4	74	38	93	57	35.87	56.7	46.57	66.47	183	153	208	184	315.67	336.67	454	504.33	2.8	2.4	7.6	1.1	5.47	5.41	5.13	4.97	0	4	0	0	0	0	0	0	4	1	1	1	1	0	0	0	0	0	2	6
25	female	40	4	10	4	72	50	39	56	46.8	34.7	30.17	46.03	198	156	253	215.67	274	271	353.33	347	4.9	7.6	5.6	6.8	5.36	5.42	5.14	5.25	0	0	1	0	0	2	1	0	4	0	1	2	0	0	0	0	0	0	1	4
26	male	48	4	24	3	36.33	38	68	42	33.93	26	65.73	49.33	196.67	160.67	242.33	265	350	439.33	503	409.33	4.9	5.4	7.2	7.4	4.93	5.18	5.14	4.93	4	6	6	2	0	0	6	3	27	3	1	2	1	2	0	2	0	0	0	11
27	female	40	4	12	4	12	12	97	32	36	43.3	37.3	36.2	422	233	344	200	521	250	471.67	389	2.8	1.2	4.4	5	5.83	5.48	5.12	5.2	0	0	0	0	0	0	0	0	0	0	1	1	2	0	0	0	0	0	1	5
28	male	23	4	48	4	87	72	119	147	41.8	31.63	53.57	49.87	170	147.67	235	220	493	494.67	738	417.67	4.2	7.1	1.3	6	5.06	5.1	5.11	5.1	0	3	1	0	0	0	0	0	4	0	1	0	0	0	0	0	0	0	2	3
29	male	19	4	36	4	17	12	260	15	54.9	38.13	65.5	53.3	241	224	234.67	279.3	369	406	640	500.3	8.1	2.3	1.6	3.6	5.43	5.33	5.02	5.54	0	0	2	0	0	0	3	4	9	3	1	1	2	0	0	0	0	0	1	8
30	male	46	4	12	4	67	104	93	142	56.7	53.3	67	19.23	184	256	248.33	271	461	555	405.33	476	11.7	4.9	11.6	15.4	5.46	4.73	5.09	5.42	3	4	5	0	0	2	0	0	14	0	1	0	1	1	0	0	0	0	1	4
31	female	50	4	72	4	49	7	21	39	62.17	69.47	34.7	77.5	223	215.67	248.5	253	315	325.67	569	385	2.3	5.8	4.6	7.5	4.68	4.3	5.7	5.46	3	5	5	0	5	0	0	0	18	3	1	1	1	1	0	2	0	0	3	12
32	male	30	4	6	4	77	23	59	38	70.73	67.5	41.53	50.43	213.67	160	121.33	242.33	316.67	342.33	532	474.67	8.6	5.5	5.4	9.1	5.06	5.03	4.78	5.15	0	5	2	0	1	0	1	5	14	0	0	0	0	0	0	0	0	0	1	1
33	female	16	4	12	4	60	50	161	93	37.3	61.6	36.53	49.23	288	191.37	334.67	348	388	298.67	494	387.33	5	4.9	1.8	2.2	4.49	4.89	4.98	4.65	0	0	0	0	0	0	0	4	4	2	0	1	0	0	0	0	0	0	1	4
34	female	49	4	12	4	197	128	197	179	51.57	61.97	37	73	222.67	200.25	295	235	347.33	320.5	522	522	4.8	2.2	17.2	7.5	4.81	5.16	5.01	4.95	0	0	0	0	0	0	0	0	0	0	1	3	3	0	0	0	0	0	1	8
35	male	19	4	36	2	227.33	117	126	257	65.5	34.4	36.27	38.27	331.33	214.33	251.67	234.67	377.67	323.67	638	635	4.8	9	7.4	4	4.78	5.17	5	5.11	0	4	0	0	0	0	0	0	4	0	1	1	0	0	0	0	0	0	0	2
36	male	20	4	12	4	101	14	145	33	67	73.6	37.9	43.6	230.33	128	222.33	248.33	545.33	258	644	453	3.3	1.7	12.3	7.7	5.62	5.89	4.57	5.69	0	0	0	0	0	0	0	0	0	0	0	1	0	0	0	0		0	2	3
37	male	37	4	7	3	84	78	168	21	53.3	38.5	56	58.5	267	219.5	239.5	352.5	450	451.5	630	537	9.5	4.6	7.7	7.7	5.14	5.3	4.89	4.91	0	0	0	0	0	0	0	0	0	0	1	2	0	0	0	0	0	0	0	3
38	male	48	4	24	4	119	125	143	196	35.67	46.83	38.53	21.57	230.33	230.83	245.67	246.33	431	505.83	595.67	557.67	1.6	2.1	7.2	8.9	5.84	5.54	5.52	5.66	0	0	0	0	0	0	0	0	0	3	1	0	3	0	0	0	0	0	1	8
39	male	48	4	12	4	99	84	98	59	38.9	46.3	36.2	42.56	389	245	325	441	686.5	432	661	606	3.2	11.1	6.5	8.3	5.12	4.87	5.02	4.86	0	0	0	0	0	0	0	0	0	2	2	2	1	1	0	0	0	0	1	9
40	male	32	4	24	4	34	7	69	53	42	65.4	15.6	62.5	172	112.67	127.33	210	358	274.67	554	463.67	4.4	7.7	11.6	7.6	5.51	5.29	5.38	5	2	0	3	0	0	0	0	0	5	1	3	0	0	0	0	0	0	0	1	5
41	male	34	4	24	4	140	30	159	50	51.37	49.7	59.13	51.67	137	116.33	237.67	180.67	453.33	270.67	713	360.33	5.3	10.1	4.6	2.1	5.02	5.18	5.06	5.17	4	0	0	0	0	0	0	3	7	1	3	1	1	1	0	0	0	0	1	8
42	male	50	4	12	4	16	4	48	11	81.37	79.13	60.6	74.6	176.33	144	189.33	204.67	303	269.67	387.67	306	3.6	6.3	8.1	6.9	5.09	5.25	4.86	5.26	0	0	3	0	0	4	0	0	7	0	1	0	3	0	0	0	0	0	1	5
43	male	25	4	6	4	242	136	293	199	55.33	53.33	39.7	64.27	327.33	254.33	309	313	481.67	475.33	506.67	583.33	11.2	2.6	14.1	17.8	5.7	5.37	5.06	4.94	1	0	0	0	0	2	0	0	3	1	1	1	0	1	0	0	0	0	2	6
44	female	16	4	48	4	149	48	66	154	53.33	89.3	65.53	34	215.33	169.33	124	231	318	220	556.33	401.67	10	6.8	8.4	1.5	4.68	5.07	4.84	4.89	3	0	3	0	0	0	0	0	6	0	0	2	0	0	0	0	0	0	2	4
45	male	25	4	24	4	73	55	99	138	74.57	65.4	35	73.3	183	169	262	274.67	290	315.67	477	520	1.9	2.1	17	6.1	5.12	5	5.2	4.99	1	0	0	0	1	1	0	3	6	0	3	3	2	1	0	1	0	0	1	11
46	female	32	4	6	4	59	48	125	64	48.43	46	31.2	46.02	173	160	106.33	254.33	418.33	341	785	505	7.8	4.1	10.6	6.9	4.97	4.65	4.92	4.78	2	0	0	0	0	2	0	0	4	3	0	0	1	1	0	0	0	0	1	6
47	female	51	4	18	4	26	21	81	54	62	46.17	34.2	50	262	299	92	292	388	463	736	489	10.5	3	5	8.8	4.13	4.58	4.76	4.95	1	0	1	0	1	1	0	5	9	3	1	0	2	1	0	1	0	0	1	9
48	female	18	4	18	2	74	38	93	57	36.87	56.7	44.57	66.47	143	153	208	178	315.67	336.67	454	504.33	1.1	5.4	7.2	1.3	5.51	5.41	5.13	4.97	1	0	5	0	0	0	0	0	6	0	1	0	0	1	0	0	0	0	0	2
49	male	40	4	12	4	49	7	38	39	62.17	69.47	34.7	77.5	226	215.67	248.5	253	315	325.67	529	385	7.8	7.8	11	7.5	4.68	4.3	4.8	4.46	4	0	3	1	0	5	0	0	13	0	0	0	0	0	0	0	0	0	2	2
50	female	48	4	6	4	77	23	59	68	65.73	67.5	41.53	50.43	213	150	221.33	242.33	326.67	342.33	532.33	447.67	7.6	5.5	7.4	9.1	5.06	5.03	4.89	4.85	2	1.5	5	0	0	3	0	0	11.5	3	1	0	3	1	0	0	0	0	1	9
51	male	39	4	12	4	60	50	161	97	33.3	61.6	35.53	49.23	288	191.37	334.67	354	388	298.67	494	387.33	5	4.9	1.8	4.2	4.49	4.89	4.98	4.65	0	0	0	0	0	0	0	0	0	0	0	0	2	0	0	0	0	0	2	4
52	male	37	4	12	4	187	128	197	119	51.57	61.97	37.53	73	222.67	200.25	295	225	347.33	320.5	522	522	4.8	8.2	17.2	7.5	4.91	5.16	5.01	4.95	4	0	0	0	0	2	0	0	6	3	1	1	0	0	0	0	0	0	2	7

## Sheet: perioral group
			Demographic features															Physiological indicators of epidermal barrier function															Values of self-reported symptoms										Doctor-evaluated grading severity
Number	Sex	Age	Invovled site	Duration	Stage	Oil content(μg·m-2)					Water content				Melanin				Haemoglobin				TEWL				PH			Burning	Dry	Itching	Stinging	Skin tension	Swelling	Ant line sense	Pain	Overall symptoms	Flushing	Non-transient erythema	Papulopustules	Telangiectasia	Burning/stinging	Plaques	Dry	Edema	Outside the facial symptoms	Phymatous	Total
				(months)		Forehead	Cheek	Nose	Chin	Forehead	Cheek	Nose	Chin	Forehead	Cheek	Nose	Chin	Forehead	Cheek	Nose	Chin	Forehead	Cheek	Nose	Chin	Forehead	Cheek	Nose	Chin
1	female	43	5	30	3	133	42	95	60	32.75	48.05	58.3	59.3	160	131.33	174	201	311.5	384.33	448	488.5	4.1	6.3	8.3	14.2	5.41	5.68	5.39	5.53	3	3	3	0	0	6	2	6	23	1	1	2	1	1	0	1	0	0	2	9
2	female	26	5	6	3	78	59	88.5	82	72	49	54.1	34.17	146	153	215	237.67	390	441.67	429	594.67	4.4	2.1	4.4	5	6.15	5.94	5.79	6.05	3	5	6	5	3	0	0	0	22	1	2	2	1	1	0	0	0	0	1	8
3	female	23	5	6	3	77	56	95	58	54.2	31.5	37.1	44	188	111	193	108.67	384.2	569.33	518	632.33	3.9	6.5	8.9	12.9	5.83	5.93	5.01	5.43	2	5	2	1	0	3	0	0	13	0	1	3	2	0	0	1	0	0	1	8
4	female	16	5	6	3	53.8	17	86	18	71.35	47.97	46.9	37.87	242.6	141.67	243	201.67	421.67	388.67	454.67	449.33	5.4	7.9	6.3	9.1	5.81	6.17	5.34	5.44	0	6	5	0	2	0	0	0	13	0	1	2	0	0	0	1	0	0	0	4
5	female	16	5	30	3	37	47	42	74	48.97	54	40.97	22.9	199	162.33	197.5	213.67	341.66	412.33	447.67	401.67	8.5	10.1	4.1	14	5.8	5.86	5.44	5.6	0	5	3	6	0	0	0	0	14	0	1	1	0	0	0	1	0	0	0	3
6	female	37	5	6	3	33	8	77	22	47.53	54	64.27	38.87	320	211.33	200.33	301.67	422.33	452.33	410	545.33	8.7	9.7	5.6	25	5.9	5.43	5.57	5.61	0	6	0	8	0	8	5	8	35	0	1	2	1	1	0	0	1	0	0	6
7	female	38	5	7	3	131	38	62	53	47	50.69	45.5	22.37	200.2	135.67	186.67	162.67	264.33	365	451.33	577.33	9.6	8.8	4.2	20.5	5.64	5.65	5.69	5.99	3	7	7	0	3	3	5	0	28	1	2	2	1	2	1	2	0	0	0	11
8	female	21	5	30	3	101	94	125	123.35	48.8	50.87	39.33	37.97	229.67	168.33	198	245	394	482.67	443.33	530.67	7.2	7	5.9	15.7	5.37	5.37	5.09	5.68	3	2	0	0	0	0	0	0	5	1	2	2	1	0	0	2	0	0	0	8
9	female	24	5	6	3	54	57	109	50	44.43	78.8	38.47	39.2	190.33	150	186	168.67	429	459.67	450.66	539.33	8.6	7.2	8.1	13.2	5.08	5.61	5.38	5.63	5	6	6	5	3	5	4	3	37	2	1	2	2	2	0	1	0	0	0	10
10	male	46	5	96	3	68	72	96	86	54.37	57.1	46.5	35.5	232.5	228	204	318	428	457.33	486.33	477.33	9	4.6	4.8	18.3	4.74	4.98	5.82	4.89	3	1	6	0	4	3	4	3	24	1	1	2	1	2	2	1	0	0	0	10
11	female	45	5	240	3	168	167	55	105	64.1	57.57	62.2	37.77	100.67	108.67	181.67	149	465.67	470.67	437.67	519.18	6.8	4.5	7.8	17.3	4.88	5.22	5.73	5.38	4	2	1	5	0	5	4	1	22	0	2	1	2	2	2	1	1	0	0	11
12	female	47	5	72	3	16	5	48	15	81	81.8	53.87	26.6	176.38	144	189.33	203.67	303	369.33	458	543.67	6.7	6.3	9.6	6.9	5.09	5.7	5.16	5.66	3	6	6	0	5	5	0	3	28	3	1	1	0	1	0	2	0	0	0	8
13	female	40	5	30	1	142	136	93	99	55.5	53.2	39.7	44.27	267.3	244.76	295	305	473	475.33	503.67	583.33	9.2	10.6	10.5	17.8	5.7	5.65	5.06	4.94	0	1	1	0	0	0	0	0	2	3	1	0	0	1	0	1	0	0	0	6
14	female	45	5	180	3	149	48.3	66	85	53.33	63.3	60.53	56.56	215.15	169.33	224	230	338	220	556.33	401.67	2	2.8	8.4	6.5	4.78	5.07	4.84	4.89	0	0	1	0	0	0	0	0	1	3	1	1	0	0	0	0	0	0	0	5

## Sheet: cheek group
			Demographic features															Physiological indicators of epidermal barrier function															Values of self-reported symptoms										Doctor-evaluated grading severity
Number	Sex	Age	Invovled site	Duration	Stage	Oil content(μg·m-2)					Water content				Melanin				Haemoglobin				TEWL				PH			Burning	Dry	Itching	Stinging	Skin tension	Swelling	Ant line sense	Pain	Overall symptoms	Flushing	Non-transient erythema	Papulopustules	Telangiectasia	Burning/stinging	Plaques	Dry	Edema	Outside the facial symptoms	Phymatous	Total
				(months)		Forehead	Cheek	Nose	Chin	Forehead	Cheek	Nose	Chin	Forehead	Cheek	Nose	Chin	Forehead	Cheek	Nose	Chin	Forehead	Cheek	Nose	Chin	Forehead	Cheek	Nose	Chin
1	female	58	2 3	18	3	142	18	126	89	47.17	10.07	57.7	45.23	125	105	145.67	89	374	532	280	655	6.7	14.4	17.6	9.4	5.19	5.56	5.04	5.51	5	5	5	0	0	0	0	0	15	2	2	2	1	1	2	1	0	0	0	11
2	female	32	2 3	12	3	4	90	29	42	24.13	38.67	68.77	43.87	171	141	165	202	336	504	357.33	475	17.5	18.4	10.5	22.8	5.45	5.91	5.02	5.65	10	10	3	4	7	0	4	0	38	2	1	2	0	3	1	3	0	0	0	12
3	female	26	2 3	120	1	105	70	100	89	33	14.63	56.9	58.5	191.667	201.33	263.5	231	392.33	467	443.667	517	23.5	11	9.8	14.8	5.52	5.56	5.57	5.45	7	5	8	3	0	0	0	0	23	3	2	1	2	2	2	2	1	0	0	15
4	female	47	2 3	180	1	29	9	25	25	71.3	55.23	43	75.3	192	91	266.667	203	369.67	409.33	369.33	472.33	9.8	11.3	12.1	12.7	5.24	5.25	4.85	5.46	5	2	6	1	1	2	1	1	19	1	2	0	3	1	0	1	0	0	0	8
5	male	22	2 3	48	1	50	55	12	43	31.5	27.67	43.7	32.5	214.3	199.3	201.67	285.3	384	380	396.33	405.67	16.6	16.8	9.1	16.9	5.13	5.54	4.825	5.3	1	1	0	0	0	1	0	0	3	3	1	1	1	1	0	0	0	0	0	7
6	female	24	2 3	12	2	158	58	142	84	51.7	33	53.2	50.17	167	122	225.33	230	342	328	521.67	395	9.1	10.5	5	9.1	5.42	5.41	5.54	5.01	7	6	8	8	4	3	4	2	42	1	1	1	1	1	0	1	0	0	0	6
7	male	44	2 3	96	1	76	39	131	126	47.8	44.6	43.7	52.33	255	232.3	290.67	318.67	516.33	435.7	494	521.67	9.2	8.2	11.7	9	4.9	4.91	5.03	4.99	0	1	1	0	0	0	0	0	2	2	1	1	1	1	0	1	0	0	0	7
8	female	44	2 3	60	1	13	23	175	29	68.23	68.13	53.2	63.53	133	130	192.67	219.25	313.67	344	452.67	391.75	3.2	2.2	2.6	4.7	5.04	5.19	5.29	5.03	1	2	3	3	0	0	0	3	12	1	1	0	1	1	0	1	0	0	0	5
9	female	20	2 3	6	2	58	84	126	100	53.4	55	32.27	57.7	185	140.3	172.6	145.67	343	424	467	479	3	2.4	7.9	7	5.02	5.15	5.03	5.07	4	3	4	5	1	6	1	9	33	1	0	1	0	0	0	1	0	0	0	3
10	female	22	2 3	24	3	75	68	56	25	63.8	60.33	51.8	68.77	158.67	113	222	167.3	250	336.67	363.67	416	7	6.3	6.7	3.6	5.57	5.54	4.85	5.67	4	5	7	0	6	1	1	0	24	1	2	2	1	1	0	0	0	0	0	7
11	female	45	2 3	36	1	4	97	126	12	69.87	36.1	47.17	56.9	113.33	56.7	207.33	149	357.8	278	655	443	18.7	27.3	9.1	25.1	4.85	5.55	5.01	5.17	10	10	3	3	8	3	3	3	43	2	1	0	1	4	0	3	1	0	0	12
12	male	35	2 3	72	3	24	10	29	12	16.73	35.53	24.13	43	196.667	66.667	189	257	444	689.33	475	424	13.4	23.3	6.4	12.6	4.8	5.42	4.99	5.15	8	8	3	0	8	5	0	0	32	2	3	2	3	2	2	3	1	0	0	18
13	female	32	2 3	24	1	54	34	82	61	60.94	65.87	33.57	67.3	172.33	125	197	201	369.33	368	361	427	2.6	5.6	3.7	4.1	5.46	5.51	5.01	5.43	2	1	5	0	0	2	0	2	12	1	1	0	0	1	0	1	0	0	0	4
14	female	30	2 3	96	1	49	47	58	67	67.43	80.47	34.03	76.9	194.33	173	188.17	225	396.33	344.67	547.33	424.33	1.3	0.9	2.8	5	5.16	5.13	4.94	4.75	9	9	10	8	7	9	3	8	63	1	0	0	1	3	0	3	0	0	0	8
15	female	18	2 3	12	1	19	5	43	63	52.07	65.73	46.16	73.1	140.67	138	257	196	327	385	545	467.67	8.3	7.1	10.6	6.9	5.08	5.06	4.77	4.81	4	4	2	0	0	0	1	0	11	2	1	0	1	2	0	1	0	0	0	7
16	female	22	2 3	12	3	133	108	256	162	37.6	47.6	40.3	46.7	207.33	175	223.5	224	436.67	284	359	411.5	2.9	5.5	3.8	7	5.94	6.08	5.51	5.85	4	6	4	1	6	6	4	2	33	2	2	3	2	2	0	3	1	0	0	15
17	female	31	2 3	48	1	162	10	85	35	63.5	71.3	67.6	71	215	67	205.33	208	424.667	335	390.33	483.33	3.9	2.9	7.7	9.1	5.11	5.27	4.59	4.88	1	1	1	0	1	0	0	0	4	3	1	1	2	0	0	0	0	0	0	7
18	female	26	2 3	18	2	142	18	158	89	47.17	10	71.3	45.23	125	85	205	89	374	532	392.33	655	6.7	14	3	9.4	5.19	5.56	4.5	5.51	1	0	0	0	1	0	0	0	2	3	1	0	3	0	0	0	0	0	0	7
19	female	42	2 3	12	2	67	109	76	38	24.13	38.7	31.5	43.87	161	141	237	202	336	504	367	475	17	20.4	7.9	22.8	5.45	5.8	5.24	5.65	1	1	1	1	0	0	0	0	4	3	1	0	2	1	0	1	0	0	0	8
20	female	43	2 3	120	1	105	70	114	40	33	14.63	51.7	58.5	230.67	221.33	245	231	393	467	389	517	25	14	10.7	14.8	5.52	5.54	5.13	5.45	0	0	0	0	0	0	0	0	0	3	1	0	3	0	0	0	0	0	0	7
21	male	32	2 3	180	1	29	9	58	23.5	71.3	55	47.8	75.3	152	91	225	203	370	407	444.5	478	8.6	13.3	8.4	13	5.24	5.25	5.42	5.46	0	0	0	0	0	0	0	0	0	1	1	0	1	0	0	0	0	0	0	3
22	female	23	2 3	48	3	58	60	75	43	31.5	28	48.23	32.5	243.3	210.3	273.3	285.3	384	380	518.33	400	16	18	2.6	16.9	5.33	5.54	4.9	5.5	3	2	0	1	1	2	2	0	11	0	1	3	3	1	0	0	0	0	0	8
23	female	19	2 3	12	2	166	57	162	136	51.7	33	35.53	50.17	177	102	244.3	230	342	328	413.67	395	6.1	10	7.3	9.1	5.42	5.48	5.04	4.85	4	4	0	0	0	0	0	0	8	3	1	0	1	1	0	1	0	0	0	7
24	female	43	2 3	60	1	76	29	231	126	46.8	49	48.7	42.7	251	265	167	303.67	516.33	438	495	522	7.2	8	7.7	5	4.6	4.95	5.03	4.99	7	7	7	0	7	0	0	0	28	1	1	0	3	2	0	2	0	0	0	9
25	female	41	2 3	60	1	13	23	175	29	68.23	68.3	50.2	75.53	244	133.8	192.67	219.25	313.67	344	450	368	3.2	2	2.6	4	5.04	5.19	5.29	5.03	0	0	0	0	2	0	0	0	2	0	0	0	1	0	0	0	0	0	1	2
26	female	39	2 3	60	2	58	20	226	11	53.4	55.07	36	57.7	86.2	140.3	253	145.67	343	424	467	479	3	2.4	7.9	6	5.02	5.15	5.03	4.87	0	0	2	0	0	0	0	0	2	1	1	1	0	0	0	0	0	0	0	3
27	female	35	2 3	24	1	76	68	56	25	64.8	61.33	51.8	68.77	158	113	220	165	280	338	433.67	416	7.9	6	6.7	3.8	5.57	5.54	4.85	5.87	5	3	5	0	6	2	0	0	21	3	0	0	0	1	0	2	0	0	0	6
28	female	41	2 3	36	1	4	12	50	12	69.87	36	58.5	56.7	123.33	50.667	180	149	358	379	413	443	18.7	27.3	3.7	25.1	4.85	5.55	5.17	5.17	0	2	2	0	2	1	0	0	7	0	1	0	0	0	1	0	0	0	0	2
29	female	15	2 3	12	1	24	10	159	12	16.2	35.53	70.3	43	206	96.667	228	256.667	443.667	689.33	395	424	13.4	25	2	12.6	4.7	5.43	5.15	5.15	5	1	0	0	0	0	0	0	6	3	1	0	0	1	0	0	0	0	0	5
30	female	41	2 3	24	3	54	34	82	21	60.94	65.87	38.57	67.2	172.33	125	187	201.67	369.33	376	431	427	2.6	6	3.7	4.1	5.46	5.51	5.01	5.43	0	5	2	0	3	0	1	0	11	0	1	2	3	1	0	1	0	0	0	8
31	female	21	2 3	36	3	49	47	88	67	67.43	92.47	34.03	76.9	194	173	188.17	225.33	396.33	347	540	424	1.3	0.9	2.8	5	5.2	5.13	4.94	4.75	3	2	0	1	1	1	0	3	11	3	1	3	0	2	0	1	0	0	0	10
32	female	36	2 3	12	3	19	5	143	123	52.07	65.73	45.13	73.1	150.67	138.33	257	196	327	285	556	465.67	5.3	6.2	10.6	6.9	5.08	5.06	4.77	4.81	7	7	7	0	5	0	0	0	26	1	1	2	1	1	0	1	0	0	0	7
33	female	33	2 3	12	3	2	3	256	162	37.6	47	47.3	46.7	183	204	223.5	224	436.67	284	355	363.5	2	4.5	4.8	7	5.94	6.38	5.1	5.85	5	1	0	0	5	0	0	0	11	1	1	2	1	1	0	0	0	0	0	6
34	female	50	2 3	48	3	155	68	85	35	63.5	71	60.6	71	206	67	205.33	207.33	424.667	335	390.33	483.33	2.7	1.9	7.7	9.1	5.5	5.27	4.39	4.88	6	6	2	0	0	0	1	2	17	1	3	3	2	0	0	0	0	0	0	9
35	female	47	2 3	18	3	175	18	89	19	47.17	10.07	47.8	45.23	155	105	173	89	380	532	436.67	655	6.7	14	3.2	9.4	5.19	5.56	4.25	5.51	5	3	5	0	6	2	2	0	23	1	1	2	2	1	0	1	0	0	1	9
36	female	43	2 3	12	3	24	8	25	22	24.13	38.67	48	43.87	175	140	250	202	336	504	388	475	17.5	14.4	3	23	5.45	5.91	4.6	5.65	5	1	2	0	2	0	0	1	11	1	1	3	2	1	0	2	0	0	0	10
37	female	50	2 3	114	1	125	70	182	109	27	14.63	53.4	58.5	191.667	201.33	166	231	392.33	467	695.33	567	23.5	19.4	7.9	14.8	5.52	5.56	5.16	5.45	5	7	6	0	0	0	0	1	19	1	2	1	2	1	0	0	0	0	0	7
38	female	34	2 3	18	1	24	9	84	25	77.3	55.23	63.8	75.3	152	91	177	203	369	407.5	368.33	473	9.8	11.3	8.7	12.7	5.24	5.25	5.08	5.46	8	5	2	0	2	0	0	1	18	1	2	1	2	0	0	0	0	0	0	6
39	female	53	2 3	48	1	49	65	226	43	31.4	27.67	49.87	32.5	214.3	199.3	173	285.3	384	380	414.67	405	16.6	16	5	16.9	5.13	5.54	5.04	5.3	3	4	1	1	1	0	0	1	11	2	1	1	1	1	0	2	0	0	0	8
40	male	43	2 3	144	3	173	58	29	82	51.7	33	16.73	50.17	167	122	232.7	230	342	328	385.33	395	9.1	7.5	6.9	9.1	5.42	5.41	5.54	5.01	9	7	8	0	0	0	0	0	24	1	2	2	1	1	0	1	0	0	0	8
41	female	51	2 3	60	3	76	39	231	126	47.8	50.6	40.94	52.33	255	265	280.67	303.67	516.33	435.33	494	521	8.4	6.8	9.7	9	4.9	4.91	5.18	4.99	5	3	5.5	0	5.5	2	0	0	21	1	2	3	2	2	1	3	0	0	1	15
42	female	51	2 3	60	3	10	23	206	29	68.23	68.13	45.2	63.53	143	130	192.67	217.25	413.67	343.67	452.67	391.75	2.2	2.2	2.6	4.7	5.04	5.19	5	5.03	7	7	7	0	7	0	3	0	31	2	2	2	2	3	0	0	1	0	0	12
43	female	36	2 3	60	2	69	84	226	144	53.4	55.07	39.27	57.7	185	140.3	173	145.67	343	424	467	479	3	1.4	7.9	7	5.02	5.15	5.03	5.07	5	8	3	0	5	0	0	0	21	1	1	0	2	1	0	0	0	0	0	5
44	female	15	2 3	24	3	94	5	66	25	63.8	60.3	51.8	68.77	159	113	219.5	165	280	337	363.67	416	7.9	6.3	4.7	3.8	5.57	5.54	4.85	5.67	7	7	7	0	5	0	0	1	27	1	1	2	1	0	0	1	0	0	0	6
45	female	22	2 3	36	3	3	12	39	12	69.87	36.1	15.3	56.9	123.33	52	244.3	149	357.33	378.7	421.3	443	18.7	28	7	25.1	4.85	5.55	5.01	5.17	5	4	3	2	7	0	2	0	23	3	1	2	0	1	0	1	0	0	0	8
46	female	21	2 3	60	1	13	10	129	12	16.73	35.53	40.5	43	187	67	241.6	256.667	473.667	689.33	467	424	13.4	20	2.6	12.6	4.825	5.43	4.98	5.15	5	3	1	0	3	0	0	1	13	3	1	0	3	1	0	1	0	0	0	9
47	female	39	2 3	240	1	119	34	82	111	60.94	65.4	33.57	67.3	172	125	197	201.67	369	369	361	427	2	5.6	3.7	4.1	5.46	5.51	5.01	5.43	1	4	2	0	0	0	0	4	11	3	1	0	3	2	0	1	0	0	0	10
48	female	41	2 3	54	1	49	47	58	67	67.43	80.47	34.03	76.9	195	173	226	225.33	396.33	345	507	424.33	1.3	0.9	2.8	5	5.16	5.13	4.8	4.75	2	7	3	0	6	1	1	0	20	1	1	0	3	1	0	1	0	0	0	7
49	female	22	2 3	12	3	19	5	43	63	52.07	66.73	47	73.1	170	168.33	257	196	327	375	556	467.67	8.3	5.1	6	6.9	5.08	5.06	4.77	4.81	7	9	6	0	0	0	0	0	22	1	1	3	2	2	0	0	0	0	0	9

## Sheet: normal control
													Physiological indicators of epidermal barrier function
Number	Oil content(μg·m-2)					Water content				Melanin				Haemoglobin				TEWL				PH
	Forehead	Cheek	Nose	Chin	Forehead	Cheek	Nose	Chin	Forehead	Cheek	Nose	Chin	Forehead	Cheek	Nose	Chin	Forehead	Cheek	Nose	Chin	Forehead	Cheek	Nose	Chin
1	60	22	36	57	59.93	68.93	44.83	66.33	205	173	229	236.67	336.33	301	200.67	252.665	4.1	5.9	6.6	7.1	5.34	5.57	5.15	5.24
2	47	20	68	45	54.1	64.63	74.8	54.17	226	133.67	206.67	210.67	350	224.67	224.67	211	2.5	5.2	5.8	2.4	4.24	3.6	4.73	3.06
3	45	38	79	41	66.57	75.32	56.57	73.53	210	132	199.3	213.67	167.67	266.67	237.3	183.5	4.7	3.2	7.2	6.1	4.98	5.08	4.73	2.67
4	42	32	27	34	52.73	52.03	46.97	69.23	153.67	113.67	138	148	238	270	207.33	158	3.9	7	2.7	6.6	4.91	4.93	4.99	4.81
5	52	42	15	70	63.3	72.13	50.13	70.33	145	132	199.33	197.67	268.67	316.67	189	260.33	2.9	2.5	6.5	4.2	5.47	5.64	5.34	5.36
6	60	45	40	53	51.9	73.53	51.77	69.3	207	186.33	269	235.33	329.33	297.33	191.33	215	5.1	4	5.2	2	5.3	5.41	5.35	5.24
7	74	34	53	44	57.7	52.3	44.8	61.93	232.67	111.67	191	188.33	414.67	266.33	195.33	214.5	3.9	1.7	4.6	3.9	5.41	5.69	5.51	4.69
8	65	40	71	54	70.43	65.7	55.6	83.97	183.33	142	224.67	200	312.33	265.33	200.67	212.33	4.4	2.6	6.5	0.5	4.9	4.73	4.4	4.55
9	55	11	75	41	50.03	51.1	58.53	35.77	216	200.667	175.5	311.667	362.667	345.667	207.67	150.67	7.6	7.7	4	2.3	5.47	5.59	5.01	5.49
10	56	43	60	36	57.5	62.17	43.32	68.75	177.33	135	170.33	235.67	400	332	308	156.67	5.2	10.8	3.8	8.2	5.19	6.81	4.52	4.75
11	34	35	52	48	53.87	68.13	46.93	65.67	200	116.67	171.67	238	436.67	264.67	276.33	346.33	8.2	10.2	2.5	8.4	4.4	5.19	5.23	4.48
12	44	40	54	46	63	56.77	29.1	69.33	190.67	96.33	202.33	246.33	326.33	257	247	207.17	6.8	3.1	1.6	1.9	5.18	5.34	5.43	5.44
13	61	18	51	60	58.43	46.33	41.35	75.3	164	100.33	139.5	271.67	297.33	280	202	209	8.6	0.7	3.6	7.3	5.12	5.48	5.91	5.38
14	38	13	56	46	56.64	49.35	20.7	75.8	211.67	197	198	245.67	279.67	305.33	211.33	206.33	5.6	1.7	7.2	0.7	4.87	5.15	4.76	5.03
15	54	16	76	56	55.1	53.3	58.23	55.9	177.33	145	199.33	172	405	323.5	215	158.83	2.3	11.9	8.1	9.3	4.9	4.92	4.71	4.92
16	65	32	16	50	55	52.43	57.17	50.3	166.33	159	209	180	395.33	318	196	330	5.4	9.4	5.2	1.9	5.22	5	5.4	4.94
17	65	18	52	45	48.23	51.43	69.6	58.8	210.33	165.33	209	167.67	407.33	332.33	195	435	5.2	13.3	5.7	8.3	4.98	5.17	4.56	5.07
18	57	20	50	36	68.2	58.1	54.2	56.2	187	183	213.67	184.33	405.33	199	204	455	7.6	7.2	4.2	5.5	4.96	4.91	4.9	4.93
19	41	37	81	45	71.9	60.17	61.5	73.5	198	113	191	183	251	290	220	360	5.1	5	4.1	8	4.41	3.46	5.18	4.58
20	57	46	51	53	67.8	65.3	48.9	68.3	250.33	122.67	192.33	183	248	293	157.67	179.5	6.3	2.6	5	3.9	4.56	4.62	4.85	4.78
21	38	22	78	51	55.53	54.23	71.43	50.5	182	119	197	303	406	337.33	193	205.83	6.1	2.3	5.1	3.9	5.48	5.29	5.03	5.06
22	51	48	17	53	65.53	64.69	28.53	62.37	200.67	139.67	176	163.67	264.33	365	194.33	188.67	5.2	1.1	6	3.5	5.64	5.65	5.8	5.99
23	66	45	56	28	60	58.07	42.87	54.6	195	176	188.17	121.67	433	279	180	177.65	5.5	6.4	11	2.5	4.54	4.84	5.12	4.97
24	53	56	59	45	58.93	53.73	57.97	59.77	196.67	145.67	181.33	226.33	310.67	326.33	231	182.33	6.2	7.2	0.6	6.8	4.86	5.29	5.16	2.98
25	79	54	79	40	50.43	49.4	42.23	52.02	236.33	166.67	160.33	223	327.33	222	237	224	4.5	10.1	4.3	1.1	5.33	5.57	5.22	5.5
26	54	28	52	47	55.03	64.83	56.53	59.67	210	153.67	219.75	196.67	369.33	277.67	204	216.17	5.8	1.2	5.1	11	4.78	5.36	4.9	4.46
27	54	61	58	59	64.6	58.7	46.27	60.4	222.67	204	216.67	212.33	462.67	303.67	230	170.5	6.4	1.4	4.5	2.2	4.8	5.28	5.03	5.46
28	61	50	56	46	70.23	80.7	40.17	63.6	223.33	150.67	217	201.33	388.33	250.67	195.33	177.33	5.1	13.5	3.9	1.2	4.71	4.52	5.32	5.03
29	52	41	71	47	59.53	55.43	38.63	56.6	250.67	131.67	257	185	159.67	273	220.5	204.5	4.7	2.6	5.7	8.1	4.61	4.62	5.28	3.58
30	48	50	22	40	48.97	51.4	56.7	72.57	175	138	156	212.57	381.33	244	198.67	220	5.8	8.4	5.8	2.5	4.54	4.63	5.38	4.62
31	45	48	53	45	56.31	60.52	45.53	70.35	168	140	148	208.67	175.33	228.33	211	215.33	2.5	9.8	4.8	12	4.85	4.78	6	5.03
32	23	36	64	37	51.93	57.23	54.37	55.57	283.75	196	223.5	284.33	400	274	204.8	301.17	7.8	10.4	5.6	8.1	5.33	5.18	5.48	5.06
33	74	50	90	66	67.87	70.57	61.33	63.47	206	228	200	317.67	287.67	290	199.67	202.17	7.8	3.8	5.9	6.5	5.66	5.71	5.6	5.18
34	61	15	18	54	65.5	56.5	59.5	61.47	204	115	205.33	185	309	304	185	199.75	6.4	1.5	4	8	5.41	5.68	4.85	5.18
35	46	21	64	54	62	46.17	44.2	80	262	159	203.33	318	390	263	196	244.5	2.5	2.1	3.8	2.8	4.23	4.58	4.76	4.95
36	67	48	57	48	55.47	51.67	51	52.67	200	149.67	242.5	263.67	402	205.33	101.21	212	4.3	9.2	5.3	6.2	5.44	4.59	5.13	5.56
37	74	45	84	40	56.6	58.2	45.8	60.67	217.33	148.67	195.33	205.67	261.67	313	181.67	200.5	5.3	13.2	4.6	6.6	5.43	4.59	5.17	5.46
38	64	14	22	23	54	62	42.7	65.2	173	119	173	146	362	304	212	213.5	5.8	9.8	3.1	3.5	5.16	5.51	5.9	5.7
39	54	18	66	35	52	65.8	56	40	160	158	196	228	286	278	188	212	5.5	1.9	2.7	4.9	5.4	5.62	5.33	5.17
40	56	29	60	37	68.23	51.27	53.07	73.6	164.33	148	163.67	152.33	263.67	182	200.33	167.83	3.6	3.9	12.7	6.6	5.33	5.39	5.59	4.87
41	42	25	71	57	55.8	69.87	64.5	70.4	195.33	180.66	279	254.33	472	117.67	98.67	216	5.5	1.4	4.1	9.2	5.31	5.25	5.53	5.28
42	54	69	56	40	57.27	56.83	66.57	67.17	215	149.67	211.5	236	339.3	310.67	203.2	215	2.7	3.9	6	2	5.38	5.55	4.73	5.6
43	52	14	61	56	58.17	80.27	55.2	83.03	119.33	146	190	184.33	311.67	305.33	211.67	200.55	10.6	13.6	5.1	5.3	3.42	4.59	4.58	4.39
44	69	46	58	49	70.23	69.7	60.63	61.17	170.33	133	180	232	283.33	277	217	213	6.5	0.9	12	6.7	4.96	5.33	5.18	5.45
45	53	12	17	49	65.13	61.7	52.77	59.77	202	148	244.67	188	234	291.67	212.67	206	5.5	3.3	4.3	6.6	5.31	5.38	4.95	5.09
46	50	24	26	61	55.93	66.77	55.03	67.5	195	157.67	232.33	233	408	270.33	194	264.5	4.6	4.4	4.2	8	4.58	4.91	5.04	5.15
47	59	23	16	56	65.67	60.93	60.9	65.5	190.33	153.67	235.33	198	395	253.67	220.33	214.5	4.3	3.5	4.1	6.3	5.21	5.16	4.85	3.98
48	72	27	75	48	56.43	53.37	62.7	46.2	223.67	126.67	223	187	264.33	138	197	208.33	7.5	2.5	3.9	5.4	5.15	5.32	5.13	5.38
49	44	46	52	44	59.33	78.47	63.87	81.2	214.33	154.33	280	248	368	319	203	205.33	4.7	1.5	9.7	7	5.03	5.41	4.85	5.24
50	64	70	40	58	51.3	52.53	50.8	52.59	239.33	220.67	245.67	296	258.67	284.33	277	213	5.2	4.3	4.8	7.1	5.18	5.33	4.96	5
51	50	16	82	34	60.3	66.76	55.3	57.6	255.5	193	279	256.33	254	225	207	234	6.2	16.1	4.9	4.9	5.56	5.63	5.53	5.57
52	55	22	50	48	52.33	60.53	54.33	73.73	163.5	136	153.67	159.33	318.75	335	207.67	203.83	5	0.8	4	6.1	4.6	4.9	4.85	4.82
53	60	23	82	75	60.33	77.67	60	75.93	178	163.33	194	189.67	330	267.33	191	184.83	4.4	2.5	7	2.9	5.12	5.37	4.56	5.01
54	68	60	67	39	68.3	80.2	58.3	60.3	160.33	134.33	144	185.33	376	256.67	191.33	178	3.5	2.2	5	2	5.3	5.13	5.05	5.35
55	46	21	16	44	56.7	43.37	45.2	52.87	206	135.33	173.2	181	326.33	266.67	211.21	182.33	5.7	2.8	5.9	3.6	5.19	5.6	5.2	5.74
56	53	46	52	65	58.67	66.47	63.92	66.03	198.33	102	200	148	401.33	265.33	379	243.25	3.2	5.8	3.1	1.4	5.17	5.05	4.8	4.98
57	54	24	82	45	60.94	65.87	53.57	67.3	212.33	125	197	201.67	369.33	268.33	221	213.5	2.6	5.6	3.7	4.1	5.46	5.51	5.01	5.43
58	40	61	52	63	59.47	39.17	65.4	59.97	198	142.67	176	267.61	315.67	301.33	204.67	210.67	5.2	3.3	11.9	8.9	5.55	5.48	5.29	5.24
59	49	47	58	67	67.43	80.47	54.03	76.9	179.33	173	188.17	225.33	396.33	304.67	197.33	212.17	1.3	0.9	2.8	5	5.16	5.13	4.94	4.75
60	57	17	95	57	76.27	76.13	50.1	75.95	217.33	140.33	181.33	218.33	453.33	281.33	168.33	223.67	1.6	2.3	2	3.6	5.64	5.6	5.43	5.53
61	59	36	64	51	77.3	78.1	60.3	71.2	192.67	181	160.33	227	413.33	292.5	166	200.5	2	3.1	2.8	2.5	5.34	5.53	4.96	4.78
62	76	19	82	46	55.7	82.4	54.27	20.1	188.83	130.67	219.75	231.83	329.33	267.67	195.75	233.83	4.3	2	13.7	2.4	5.14	5.29	4.56	5.13
63	79	55	68	42	52.07	65.73	57.13	73.1	148.67	138.33	257	196	327	285.33	256	233.83	2.3	1.1	4.6	5.9	5.08	5.06	4.77	4.81
64	63	61	24	46	49.5	45	56	46.4	130	118	156	191	315.67	321	180	234.67	4.4	7.9	6.9	3.8	5.2	5.14	4.76	5.13
65	36	58	57	18	39.73	66.97	41.5	77.8	189.33	102.67	148	180	328	259.67	202.33	192	3.2	0.6	6.4	1.3	5.5	5.39	5.25	5.23
66	55	35	84	77	56.4	46.5	54.4	64.8	253	181	200	228.67	175.5	321	196	220.83	4.7	4.6	5	3.5	5.19	5	5.37	5.12
67	60	57	62	34	83.37	62.53	62.4	82.1	179.33	139	203.33	190.67	367.33	336.67	171	204.67	1.2	3.5	4.8	4	5.02	5.11	5.27	5.68
68	65	51	57	53	56.7	31	54	55.9	226	201.67	242.5	223.5	329	303.67	182	213.25	9.3	15.9	4.8	6.3	5.45	5.15	5.12	5.14
69	73	26	58	41	51.5	52.1	61.7	64.73	168.33	172.33	195.33	212.67	437.33	243.33	207	233.5	2.5	4.7	1.6	4.4	3.47	4.1	4.67	4.66
70	52	36	62	25	62.2	70.8	56.2	63.65	183.33	154.5	203.33	206.67	405	280.5	149.33	189.17	6.4	3.4	7.2	9.6	5.04	5.08	5.17	5.05
71	57	58	75	50	55.97	52.17	65.53	62.73	170.33	112	248.5	189	361	341	209	208.5	7.4	2.3	5.2	1.3	5.49	5.45	4.25	5.41
72	57	51	59	45	63.17	49.17	58.3	76.57	157.33	122.33	217	195.33	394	282.33	190	207.67	6.8	12	11.8	11.9	5.45	5.65	4.78	5.57
73	52	52	52	42	69.77	34.53	46.15	73.03	164.33	97.5	189	181	166.33	263.75	181.67	208	5.1	15.9	6	11.7	5.36	5.75	4.74	4.64
74	61	17	55	54	49	29.27	51.17	60.27	163.67	98	209.5	167.33	344	194.67	206.63	217.33	5.9	7.2	5.7	0.7	5.04	5.48	4.59	5.39
75	58	60	61	58	47.8	56.7	54.1	64.97	160.33	161.667	246	212	194.66	351	197	244	7.5	13.5	5.6	6.9	5.2	5.75	5.11	4.55
76	50.5	13	66	57	56.9	55.4	76.5	71.63	182	170	188.33	313.33	335	277.67	98.67	231.5	5.6	7.5	2.4	1.6	4.91	4.89	4.63	5.23
77	31	23	76	26	56.37	47.34	61.23	45.4	232.5	227.66	191.33	319	425	307.33	198.67	236.5	9	2.6	2.9	9.3	4.74	4.98	4.69	4.82
78	52	50	75	56	53.8	33.87	31.7	46.03	198	156	222.67	315.67	274	271	211	173.5	5.9	1.6	6.7	6.8	5.36	5.42	5.32	5.25
79	64	28	62	31	61.43	54.83	56.23	74.83	213.66	170.33	163.33	238	243	317	203	210	6.4	6.8	4.9	8	4.88	5.12	4.52	5.35
80	68	70	40	63	56.6	59.57	53.82	55.23	255.67	177.33	230.33	225.67	416.67	293.67	207	201.17	3.1	16	2.5	9.3	5.13	5.4	4.92	5.39
81	60	53	86	52	64.6	43.53	69.8	64.1	182	161	280.33	185.667	373.667	258	80.67	208	5.4	11.4	6.2	9.3	5.22	5.45	5.11	5.41
82	50	36	64	49	58.87	32.07	60.17	30.6	191	174	166.67	206	433.33	278.33	209	204.83	5.1	1.5	6.9	0.7	5.15	5.23	4.26	5.13
83	60	57	61	56	51.53	47.17	59.23	55.4	205.33	108.33	189	163.33	423.67	222	155	211.67	9.3	0.9	4	0.9	5.38	5.4	5.33	5.41
84	61	59	68	54	50.77	69.37	56.4	68.67	187.33	80.33	195.5	144.67	365.67	285.33	182.33	237.33	5.5	18.2	6.8	6.3	5.67	5.68	5.3	4.35
85	60	56	28	34	52.4	79.23	54.7	64.27	124.33	123.67	271	286	281.67	280	182.33	213	4.1	1.2	4.6	9.7	5.29	5.33	4.72	4.72
86	52	48	58	48	56.47	52.47	73.6	84	164.75	61	241	220.2	364	309.667	188.67	211.17	5.6	2.2	1.7	2.2	4.85	5.32	5.38	5.27
87	58	49	84	52	56.4	45.47	43.6	58.43	177.67	113	221.33	213.67	256	342.67	192.33	209.5	2	2.1	5.5	1.1	5.29	5.57	4.98	5.48
88	57	63	62	54	56.1	80.8	54.7	59.4	179.33	208	209	239.67	360.67	400	181.67	221.33	4	1.8	6.9	5	4.81	4.94	4.44	5.19
89	67	57	58	54	51.33	65.87	54.7	51.43	209.33	150	201.07	242	264.667	111.33	226	183.625	5.6	10.7	5.3	9.2	5.27	5.69	5.02	4.43
90	54	50	56	30	55.36	60.37	64.07	60.79	205.33	218.5	183	263.67	350.67	294.25	208	210.83	8.6	0.9	4.4	0.9	5.13	5.03	4.75	5.18
91	77	63	40	59	56.5	86.07	47.53	68.2	224	186	237.67	252	260	268	222	187	5.2	12.1	9	0.7	5.13	5.57	4.83	4.66
92	66	62	42	69	60.13	71.93	53.1	53	178	132.33	262.33	193	418.33	260.67	225.67	208.33	2.8	10.5	6.6	2.3	5.08	5.47	4.79	5.19
93	59	18	43	50	55.43	79.97	49.7	109.2	190.33	150.33	142.33	199.67	429	189.67	198.33	219.67	8.6	2.2	4.3	2.1	5.08	5.41	4.68	4.63
94	49	52	54	44	71.3	61.23	45.67	75.3	152	91	154.33	203	369.67	249.33	199.67	236.165	5.8	11.3	5.7	2.7	5.24	5.25	4.71	4.66
95	45	18	69	50	65.8	57.2	55.87	70.3	162	145	205.33	198	302.33	225.33	217.33	226.17	6.8	9.5	1.3	1.4	4.98	5.3	4.69	5.2
96	48	42	68	54	63.13	69.33	57.23	72.83	182.33	156.33	184.67	126	253.67	259.33	210	178.67	4.7	2.3	6.5	6.9	5.84	5	5.2	5.18
97	54	16	64	67	50.03	88.2	71.43	62.53	186.667	107.667	279	178	426	226.33	203	210	6.2	14.8	5.7	1.8	5.55	5.57	5.03	4.55
98	67	29	57	51	63.33	60.53	48.53	90.43	154	126.33	198.33	144.33	411	278	201.67	205	6.6	8.5	5.1	8	5.22	5.53	5.29	4.57
99	54	58	18	43	57.43	43.73	47.87	59.33	167	150	143.67	186.33	402	254	205	169.33	6.7	14.5	2.6	2.4	5.09	5.15	4.82	4.7
100	37	38	62	42	53.93	80	57.97	55.33	196.67	160.67	262	255.67	350	439.33	217	204.67	5.1	1.4	3.5	7.4	4.93	5.08	4.78	5.13
101	57	26	66	45	71.9	56.6	52.23	74.23	208	134.33	271	198.33	331	210	194	246.33	3.8	6.3	5.5	4.6	5.36	5.55	5.03	4.58
102	41	19	76	50	65.47	56.7	56.53	106.3	178.67	130.33	148	157.33	386	401	225.67	211.67	6.4	10	7.9	0.7	5.41	5.63	4.86	5.62
103	56	57	75	61	54.57	90	46.27	64.77	188	149	203.67	185	394	272	184.33	183	6	10.2	6	9.9	5.32	5.7	4.86	5.55
104	62	47	52	47	59.23	34.47	40.17	67.9	152.33	126.67	230	163.33	405.67	254	190.33	220.83	5	15.4	5	3.8	5.95	5.79	4.83	4.14
105	62	58	64	53	55.9	74.83	58.63	77.37	167.33	149.33	259	211.33	363.67	419	212	197.67	6	2.8	2.6	2.8	5.86	5.1	4.98	5.26
106	51	52	61	61	56.67	92.2	66.7	58.03	166.67	140.33	133.3	201.33	383	237.67	329	192.83	4.8	0.8	1.8	1.1	5.36	5.25	5.1	5.16
107	52	61	18	38	49.83	80.73	45.53	53.83	168.33	144	216.33	222	392.67	237.33	203.67	231.5	5.1	15.8	3.2	2.2	5.19	4.98	4.78	5.08
108	52	51	24	67	60.2	72.2	44.37	53.83	190	160	206.67	217	362	288	203	198.5	5.5	2.6	3.8	7	5.51	5.31	6.1	5.4
109	65	55	57	30	57.73	86.3	57.53	54.97	149.67	111.33	189	316.67	361.33	253	199	162.33	3.3	7.2	4.6	3.5	5.3	5.32	5.05	5.38
110	57	53	84	51	54.5	83.8	52.2	78.27	168	114	192.5	225	402	242	186	243	2.3	4.1	5.2	1.3	4.82	5.43	4.77	4.52
111	52	54	62	61	44.4	60.67	56.27	67.6	164	140.6	149	226	315	116.7	200	211.5	7.6	9.7	3.2	1.5	4.55	5	4.89	5
112	53	59	85	52	57.53	54	43.7	88.87	320	211.33	163.33	322.67	282.33	282.33	272	172.67	5.7	9.7	6.1	2.5	4.42	5.53	4.52	5.3
113	50	55	52	43	51.5	87.67	50.17	32.5	244.3	149.3	230.33	285.3	384	280	202	202.83	6.6	1.8	7.2	1.9	5.13	5.54	4.85	5.3
114	58	57	58	50	52	101.3	55.9	103.63	191.33	180	280.33	226.33	368	266.3	234.67	160.33	5.8	2.6	5.3	0.8	4.8	5.05	5	5.19
115	34	55	56	63	55.33	42.9	56	84.2	156.33	114.33	166.67	192.33	446.67	253.67	202.33	222.83	4.3	9.5	3.4	1.4	4.95	5.32	5.02	5.15
